# Supplementary material for: The synthesis of symmetrical disulfides by reacting organic halides with Na2S2O3·5H2O in DMSO
Source: Royal Society of Chemistry journal article supplement (doi:10.1039/c5nj01885d), 2015-11-20

## Supporting Information

**Synthesis of Symmetrical Disulfides by Reacting Organic  
Halides with  $\text{Na}_2\text{S}_2\text{O}_3 \cdot 5\text{H}_2\text{O}$  in DMSO**

**A typical scale-up procedure:**

A mixture of well-powdered  $\text{Na}_2\text{S}_2\text{O}_3 \cdot 5\text{H}_2\text{O}$  (30 mmol, 7.445 g) and *o*-chlorobenzyl chloride (30.75 mmol, 4.952 g) in wet DMSO (30 mL DMSO + 3 mL  $\text{H}_2\text{O}$ ) was stirred magnetically at 60-70 °C. The progress of the reaction was checked by litmus paper. After stirring for 4h, the color of litmus paper changed from yellow to red. The stirring was continued for further 2h under such conditions. Then the reaction was worked up by adding  $\text{H}_2\text{O}$  (10 mL) and extracted with 1:1 *n*-hexane/EtOAc (3×15 mL). The product was further purified by recrystallization from *n*-hexane to afford pure bis(2-chlorobenzyl) disulfide in 4.162 g, 88% yield.

**General Procedure:**

A mixture of an alkyl halide (2-2.1 mmol) and well-powdered  $\text{Na}_2\text{S}_2\text{O}_3 \cdot 5\text{H}_2\text{O}$  (2 mmol) in wet DMSO (2 mL DMSO + 0.2 mL  $\text{H}_2\text{O}$ ) was stirred magnetically at 60-70 °C. The progress of the reaction was checked by litmus paper. After changing the color of litmus paper from yellow to red (0.5-10 h), the stirring was continued for further 2h under such conditions to ensure the reaction completion. Next, the reaction was worked up by dilution with water (2 mL). The crude product was extracted and was further purified by recrystallization or chromatography on silica gel.

In this line, the oily products including **1, 2, 3, 4, 9, 10, 12, 13, 14, 15, 17** were extracted from the corresponding reaction mixtures using *n*-hexane in good purities and were further purified by chromatography on silica gel using *n*-hexane as eluent. Also, the solid disulfides including **5, 6, 8, 11,** and **16** were extracted with 1:1 *n*-hexane/EtOAc and subjected to recrystallization in 20:1 *n*-hexane/EtOAc to afford the corresponding disulfides in high purity. The crystalline disulfide **7** was obtained in 60% yield after extraction with 1:1 *n*-hexane/EtOAc and chromatography on silica gel using 5:1 *n*-hexane/EtOAc as eluent.

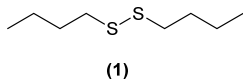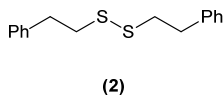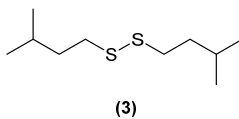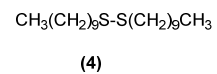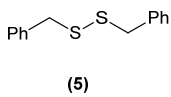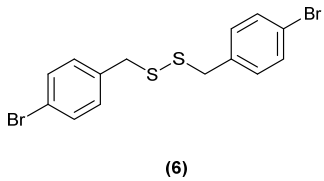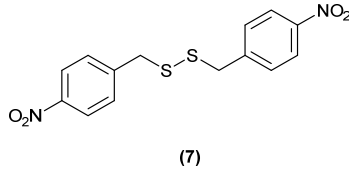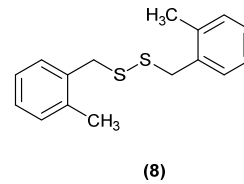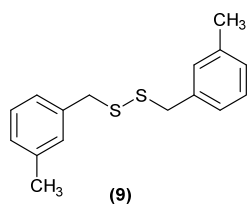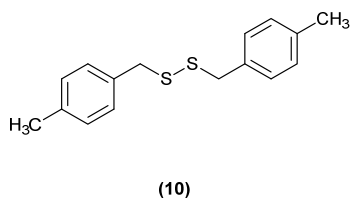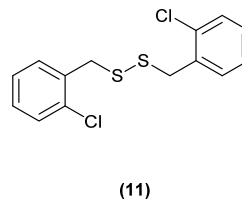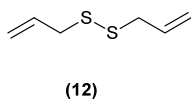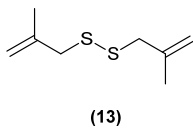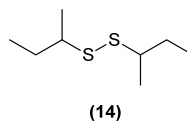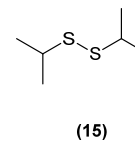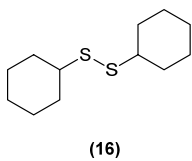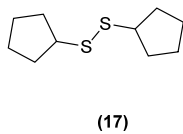

**Spectral Data & Analysis****Dibutyl disulfide (1):**

Colorless oil;  $^1\text{H}$ NMR (250 MHz,  $\text{CDCl}_3$ ):  $\delta$  2.69 (t,  $J = 7.4$  Hz, 4H), 1.71-1.66 (m, 4H), 1.48-1.40 (m, 4H), 0.93 (t,  $J = 7.3$  Hz, 6H);  $^{13}\text{C}$ NMR (62.5 MHz,  $\text{CDCl}_3$ ):  $\delta$  39.3, 31.7, 22.0, 14.0. Anal. Calcd for  $\text{C}_8\text{H}_{18}\text{S}_2$ : C, 53.88; H, 10.17; S, 35.95. Found: C, 53.73; H, 10.29; S, 35.98.

**Decyl disulfide (4):**

Colorless oil;  $^1\text{H}$ NMR (250 MHz,  $\text{CDCl}_3$ ):  $\delta$  0.80-0.85 (m, 6H), 1.21-1.35 (m, 28H), 1.59-1.73 (m, 4H), 2.64 (t,  $J = 7.3$  Hz, 4H);  $^{13}\text{C}$ NMR (62.5 MHz,  $\text{CDCl}_3$ ):  $\delta$  39.2, 31.8, 29.6, 29.5, 29.3, 29.2, 29.0, 28.5, 22.8, 14.2; Anal. Calcd for  $\text{C}_{20}\text{H}_{42}\text{S}_2$ : C, 69.29; H, 12.21; S, 18.50 %. Found: C, 69.35; H, 12.29; S, 18.36 %.

**Dibenzyl disulfide (5):**

White crystals; m.p. 68 – 70 (Lit.<sup>3</sup> 68-70 °C);  $^1\text{H}$ NMR (400 MHz,  $\text{CDCl}_3$ ):  $\delta$  7.34-7.26 (m, 10 H), 3.61 (s, 4H);  $^{13}\text{C}$ NMR (100 MHz,  $\text{CDCl}_3$ ):  $\delta$  138.6, 130.7, 129.7, 128.7, 44.5. Anal. Calcd for  $\text{C}_{14}\text{H}_{14}\text{S}_2$ : C, 68.25; H, 5.73; S, 26.02%. Found: C, 68.39; H, 5.66; S, 25.95%.

**Bis(4-Bromobenzyl) disulfide (6):**

Yellow crystals; m.p. 87–89 °C (Lit.<sup>2</sup> 88-89 °C);  $^1\text{H}$ NMR (250 MHz,  $\text{CDCl}_3$ ):  $\delta$  7.34-7.27 (m, 4H), 6.98-6.89 (m, 4H), 3.46 (s, 4H);  $^{13}\text{C}$ NMR (62.5 MHz,  $\text{CDCl}_3$ ):  $\delta$  136.3, 131.6, 131.2, 121.5, 42.5; Anal. Calcd for  $\text{C}_{14}\text{H}_{12}\text{Br}_2\text{S}_2$ : C, 41.60; H, 2.99; S, 15.86. Found: C, 41.65; H, 3.10; S, 15.77.

**Bis(2-methylbenzyl) disulfide (8):**

White crystals; m.p. 71-73 °C;  $^1\text{H NMR}$  (400 MHz,  $\text{CDCl}_3$ ):  $\delta$  7.26-7.13 (m, 8H), 3.67 (s, 4H), 2.38 (s, 6H);  $^{13}\text{C NMR}$  (100 MHz,  $\text{CDCl}_3$ ):  $\delta$  135.8, 134.0, 129.5, 129.4, 126.7, 124.9, 40.5, 18.2. Anal. Calcd for  $\text{C}_{16}\text{H}_{18}\text{S}_2$ : C, 70.02; H, 6.61; S, 23.37 %. Found: C, 69.91; H, 6.55; S, 23.54 %.

**Bis(3-methylbenzyl) disulfide (9):**

Colorless oil;  $^1\text{H NMR}$  (250 MHz,  $\text{CDCl}_3$ ):  $\delta$  7.30-7.07 (m, 8H), 3.62 (s, 4H), 2.39 (s, 6H);  $^{13}\text{C NMR}$  (62.5 MHz,  $\text{CDCl}_3$ ):  $\delta$  138.1, 137.3, 130.2, 128.4, 128.2, 126.5, 43.3, 21.4. Anal. Calcd for  $\text{C}_{16}\text{H}_{18}\text{S}_2$ : C, 70.02; H, 6.61; S, 23.37 %. Found: C, 69.97; H, 6.77; S, 23.26 %.

**Bis(2-chlorobenzyl) disulfide (11):**

Yellow crystals; m.p. 70-72 °C (Lit.<sup>4</sup> 74 °C);  $^1\text{H NMR}$  (250 MHz,  $\text{CDCl}_3$ ):  $\delta$  7.40-7.18 (m, 8H), 3.79 (s, 4H);  $^{13}\text{C NMR}$  (62.5 MHz,  $\text{CDCl}_3$ ):  $\delta$  135.0, 134.1, 131.6, 129.7, 128.9, 126.7, 41.1. Anal. Calcd for  $\text{C}_{14}\text{H}_{12}\text{Cl}_2\text{S}_2$ : C, 53.34; H, 3.84; S, 20.34%. Found: C, 53.44; H, 3.96; S, 20.19%.

**Bis(2-methyl-2-propenyl) disulfide (13):**

Colorless oil;  $^1\text{H NMR}$  (250 MHz,  $\text{CDCl}_3$ ):  $\delta$  1.80 (s, 6H), 3.27 (s, 4H), 4.77-4.86 (m, 4H);  $^{13}\text{C NMR}$  (62.5 MHz,  $\text{CDCl}_3$ ):  $\delta$  141.0, 115.1, 46.6, 20.7; Anal. Calcd for  $\text{C}_8\text{H}_{14}\text{S}_2$ : C, 55.12; H, 8.09; S, 36.79 %. Found: C, 55.25; H, 8.01; S, 36.74 %.

***iso*-Propyl disulfide (15):**

Colorless oil;  $^1\text{H NMR}$  (250 MHz,  $\text{CDCl}_3$ ):  $\delta$  1.30 (d,  $J$  = 6.9 Hz, 12H), 2.97 (m, 2H);  $^{13}\text{C NMR}$  (62.5 MHz,  $\text{CDCl}_3$ ):  $\delta$  22.6, 41.4; Anal. Calcd for  $\text{C}_6\text{H}_{14}\text{S}_2$ : C, 47.95; H, 9.39; S, 42.66. Found: C, 47.85; H, 9.44; S, 42.71 %.

**Cyclohexyl disulfide (16):**

White solid; m.p. 123-125°C (Lit.<sup>1</sup> 124-129 °C); <sup>1</sup>HNMR (250 MHz, CDCl<sub>3</sub>): δ 1.17-1.31 (m, 10H), 1.52-1.64 (m, 2H), 1.70-1.82 (m, 4H), 1.99-2.06 (m, 4H), 2.64-2.73 (m, 2H); <sup>13</sup>CNMR (62.5 MHz, CDCl<sub>3</sub>): δ 50.1, 32.7, 26.1, 25.7; Anal. Calcd for C<sub>12</sub>H<sub>22</sub>S<sub>2</sub>: C, 62.55; H, 9.62; S, 27.83. Found: C, 62.43; H, 9.77; S, 27.80 %.

**Cyclopentyl disulfide (17):**

Colorless oil; <sup>1</sup>HNMR (250 MHz, CDCl<sub>3</sub>): δ 3.45-3.39 (m, 2H), 1.97-1.94 (m, 4H), 1.69-1.51 (m, 12H); <sup>13</sup>CNMR (62.5 MHz, CDCl<sub>3</sub>): δ 50.7, 32.9, 24.7; Anal. Calcd for C<sub>10</sub>H<sub>18</sub>S<sub>2</sub>: C, 59.35; H, 8.97; S, 31.68. Found: C, 59.50; H, 9.01; S, 31.49%.

**References:**

- 1) Hajipour, A. R.; Mostafavi, M.; Ruoho, A. E.; *Phosphorus, Sulfur, Silicon Relat. Elem.* **2009**, *184*; 1920 – 1923.
- 2) Snyder, H. R.; Handrick; G. R. *J. Am. Chem. Soc.* **1944**, *66*; 1860-1863.,1862.
- 3) Soleiman-Beigi, M.; Mohammadi, F. *Synlett* **2015**, 911 – 914.
- 4) Srivastava, S. K.; Rastogi, R.; Rajaram, P.; Butcher, R. J.; Jasinski, J. P. *Phosphorus, Sulfur, Silicon Relat. Elem.* **2010**, *185*; 455-462.

# Spectra



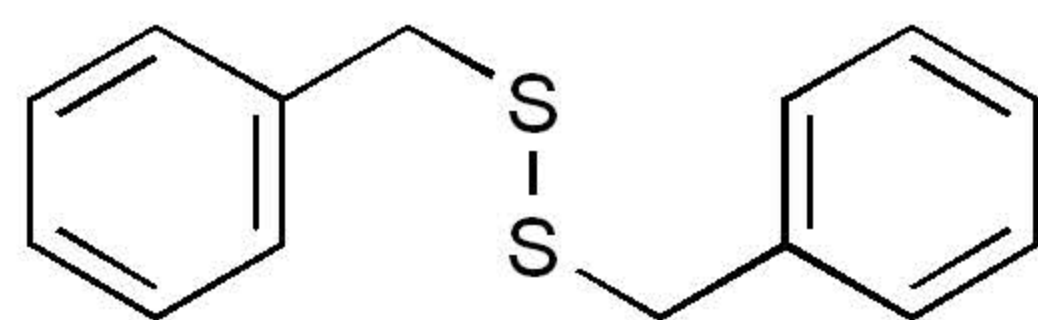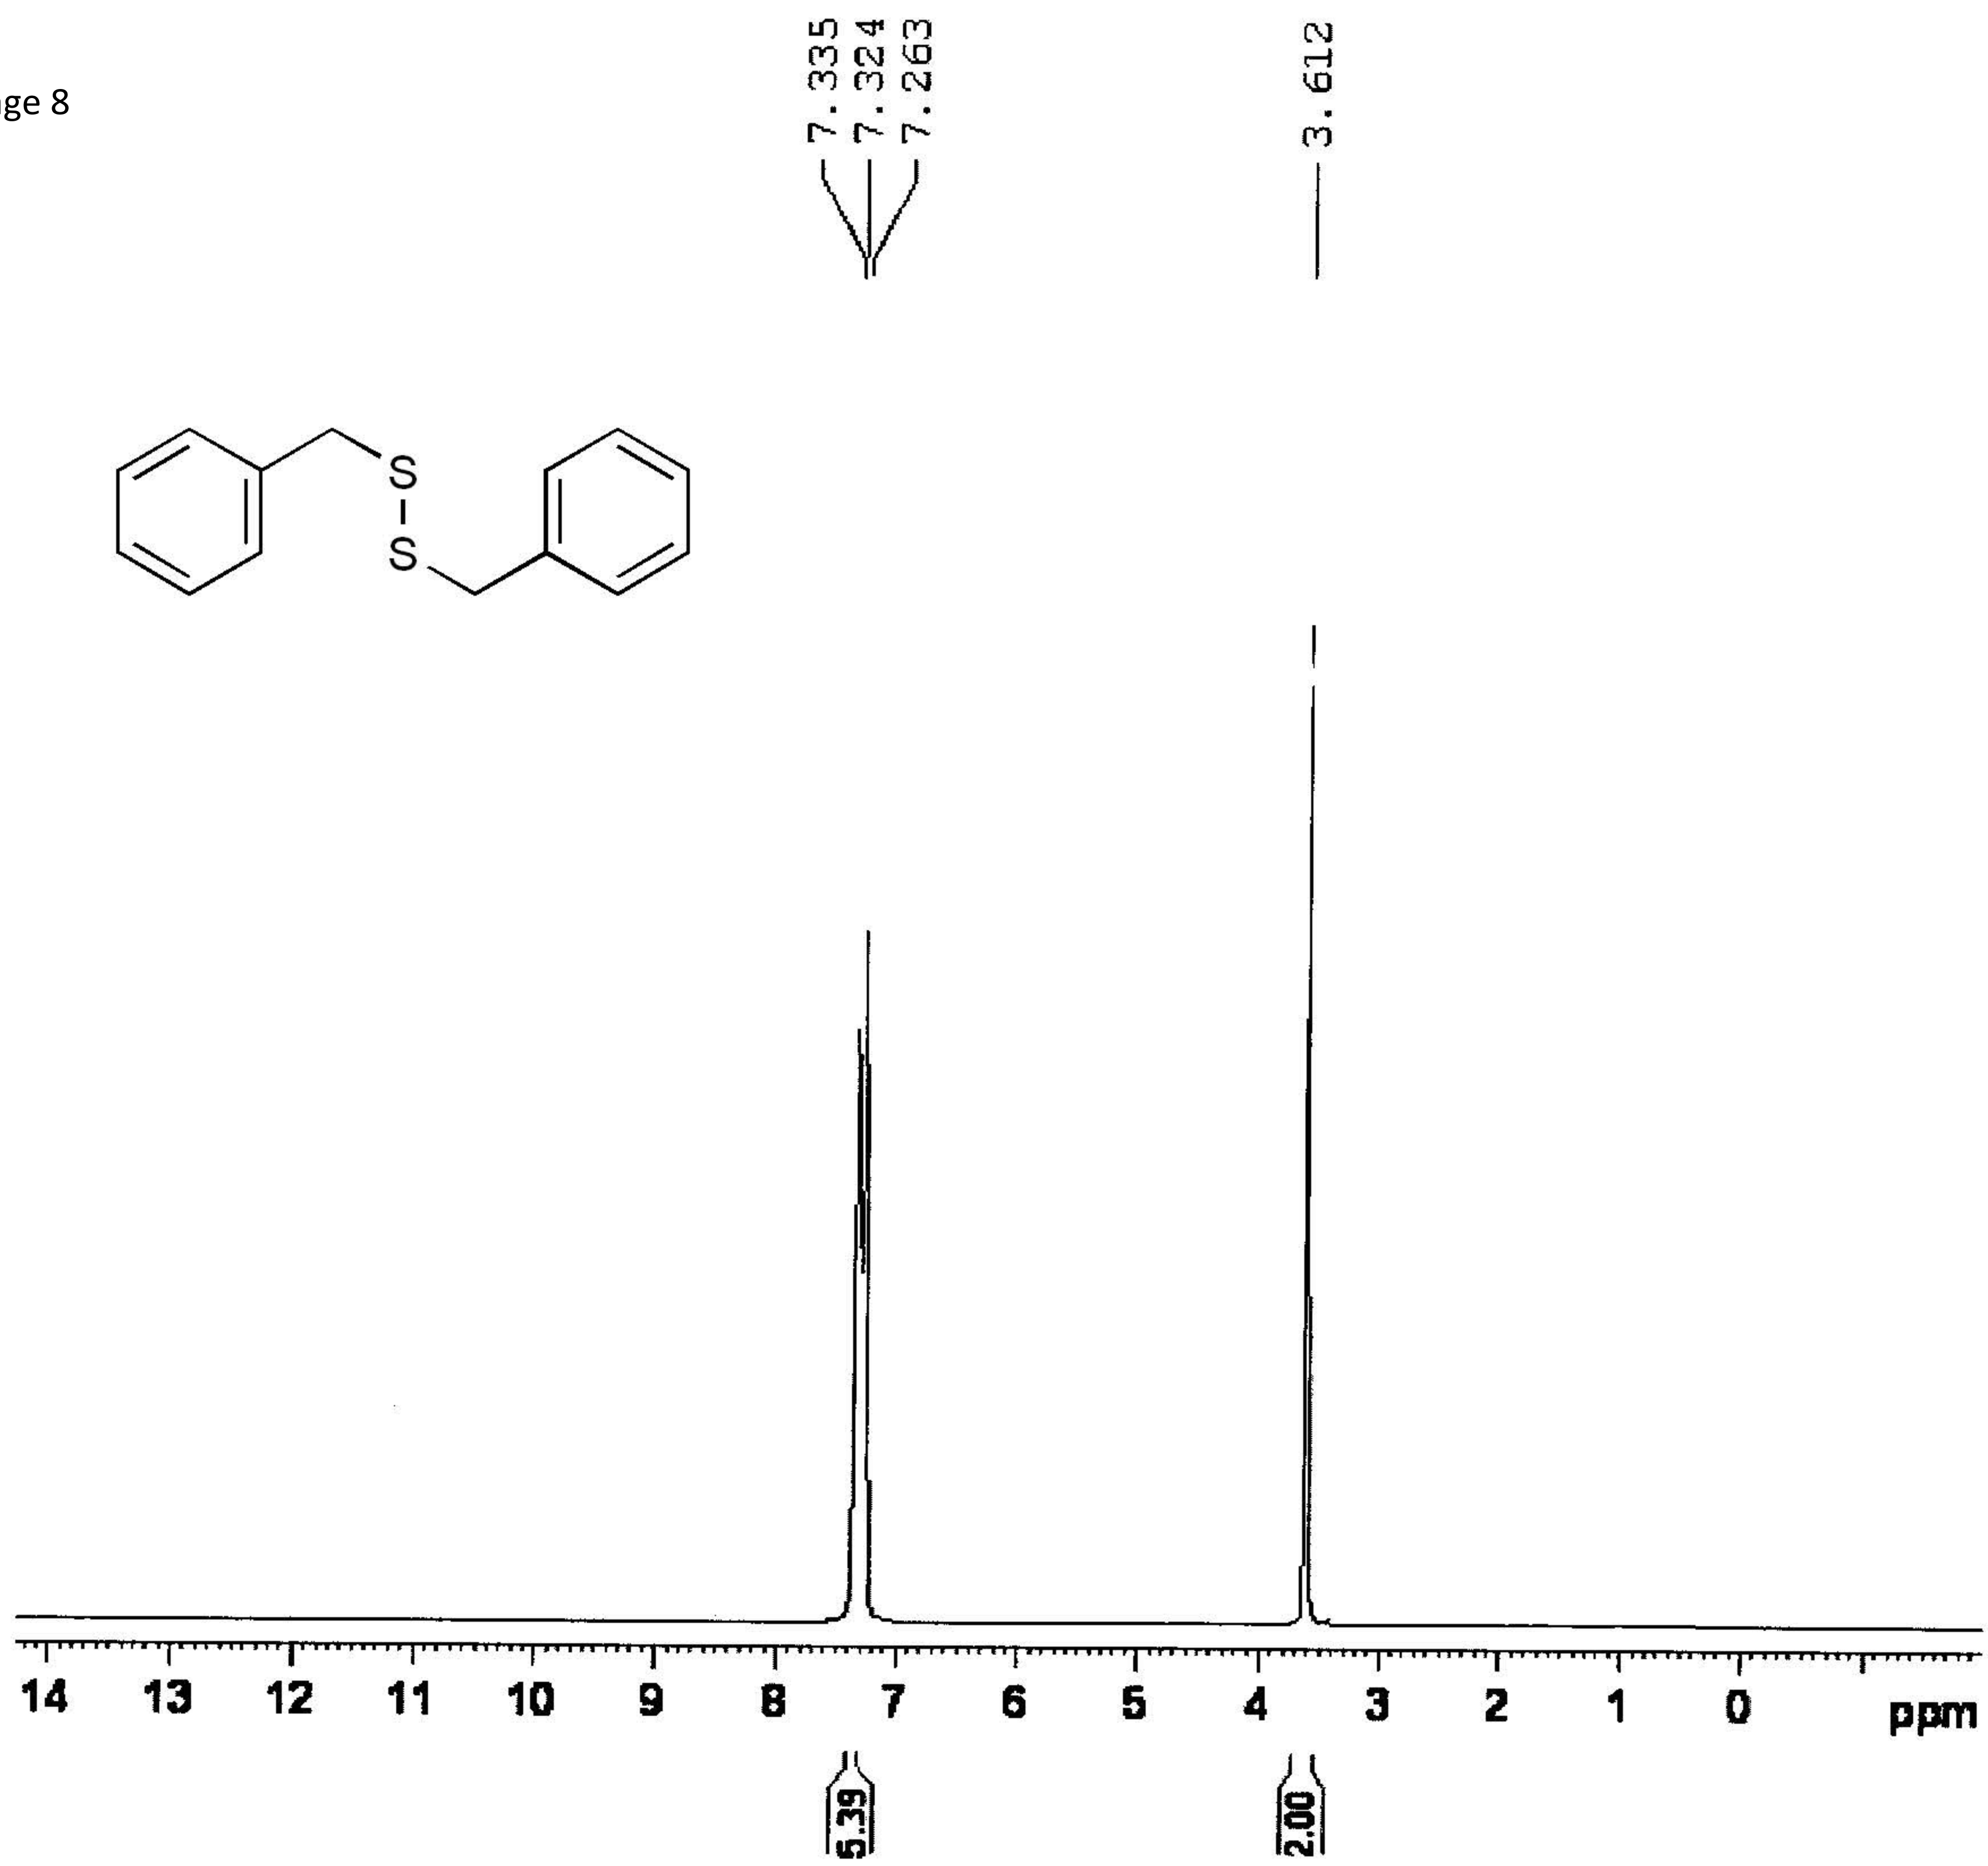

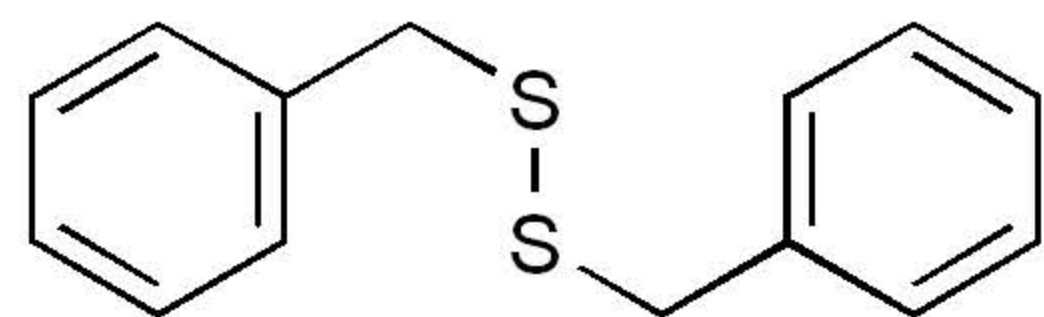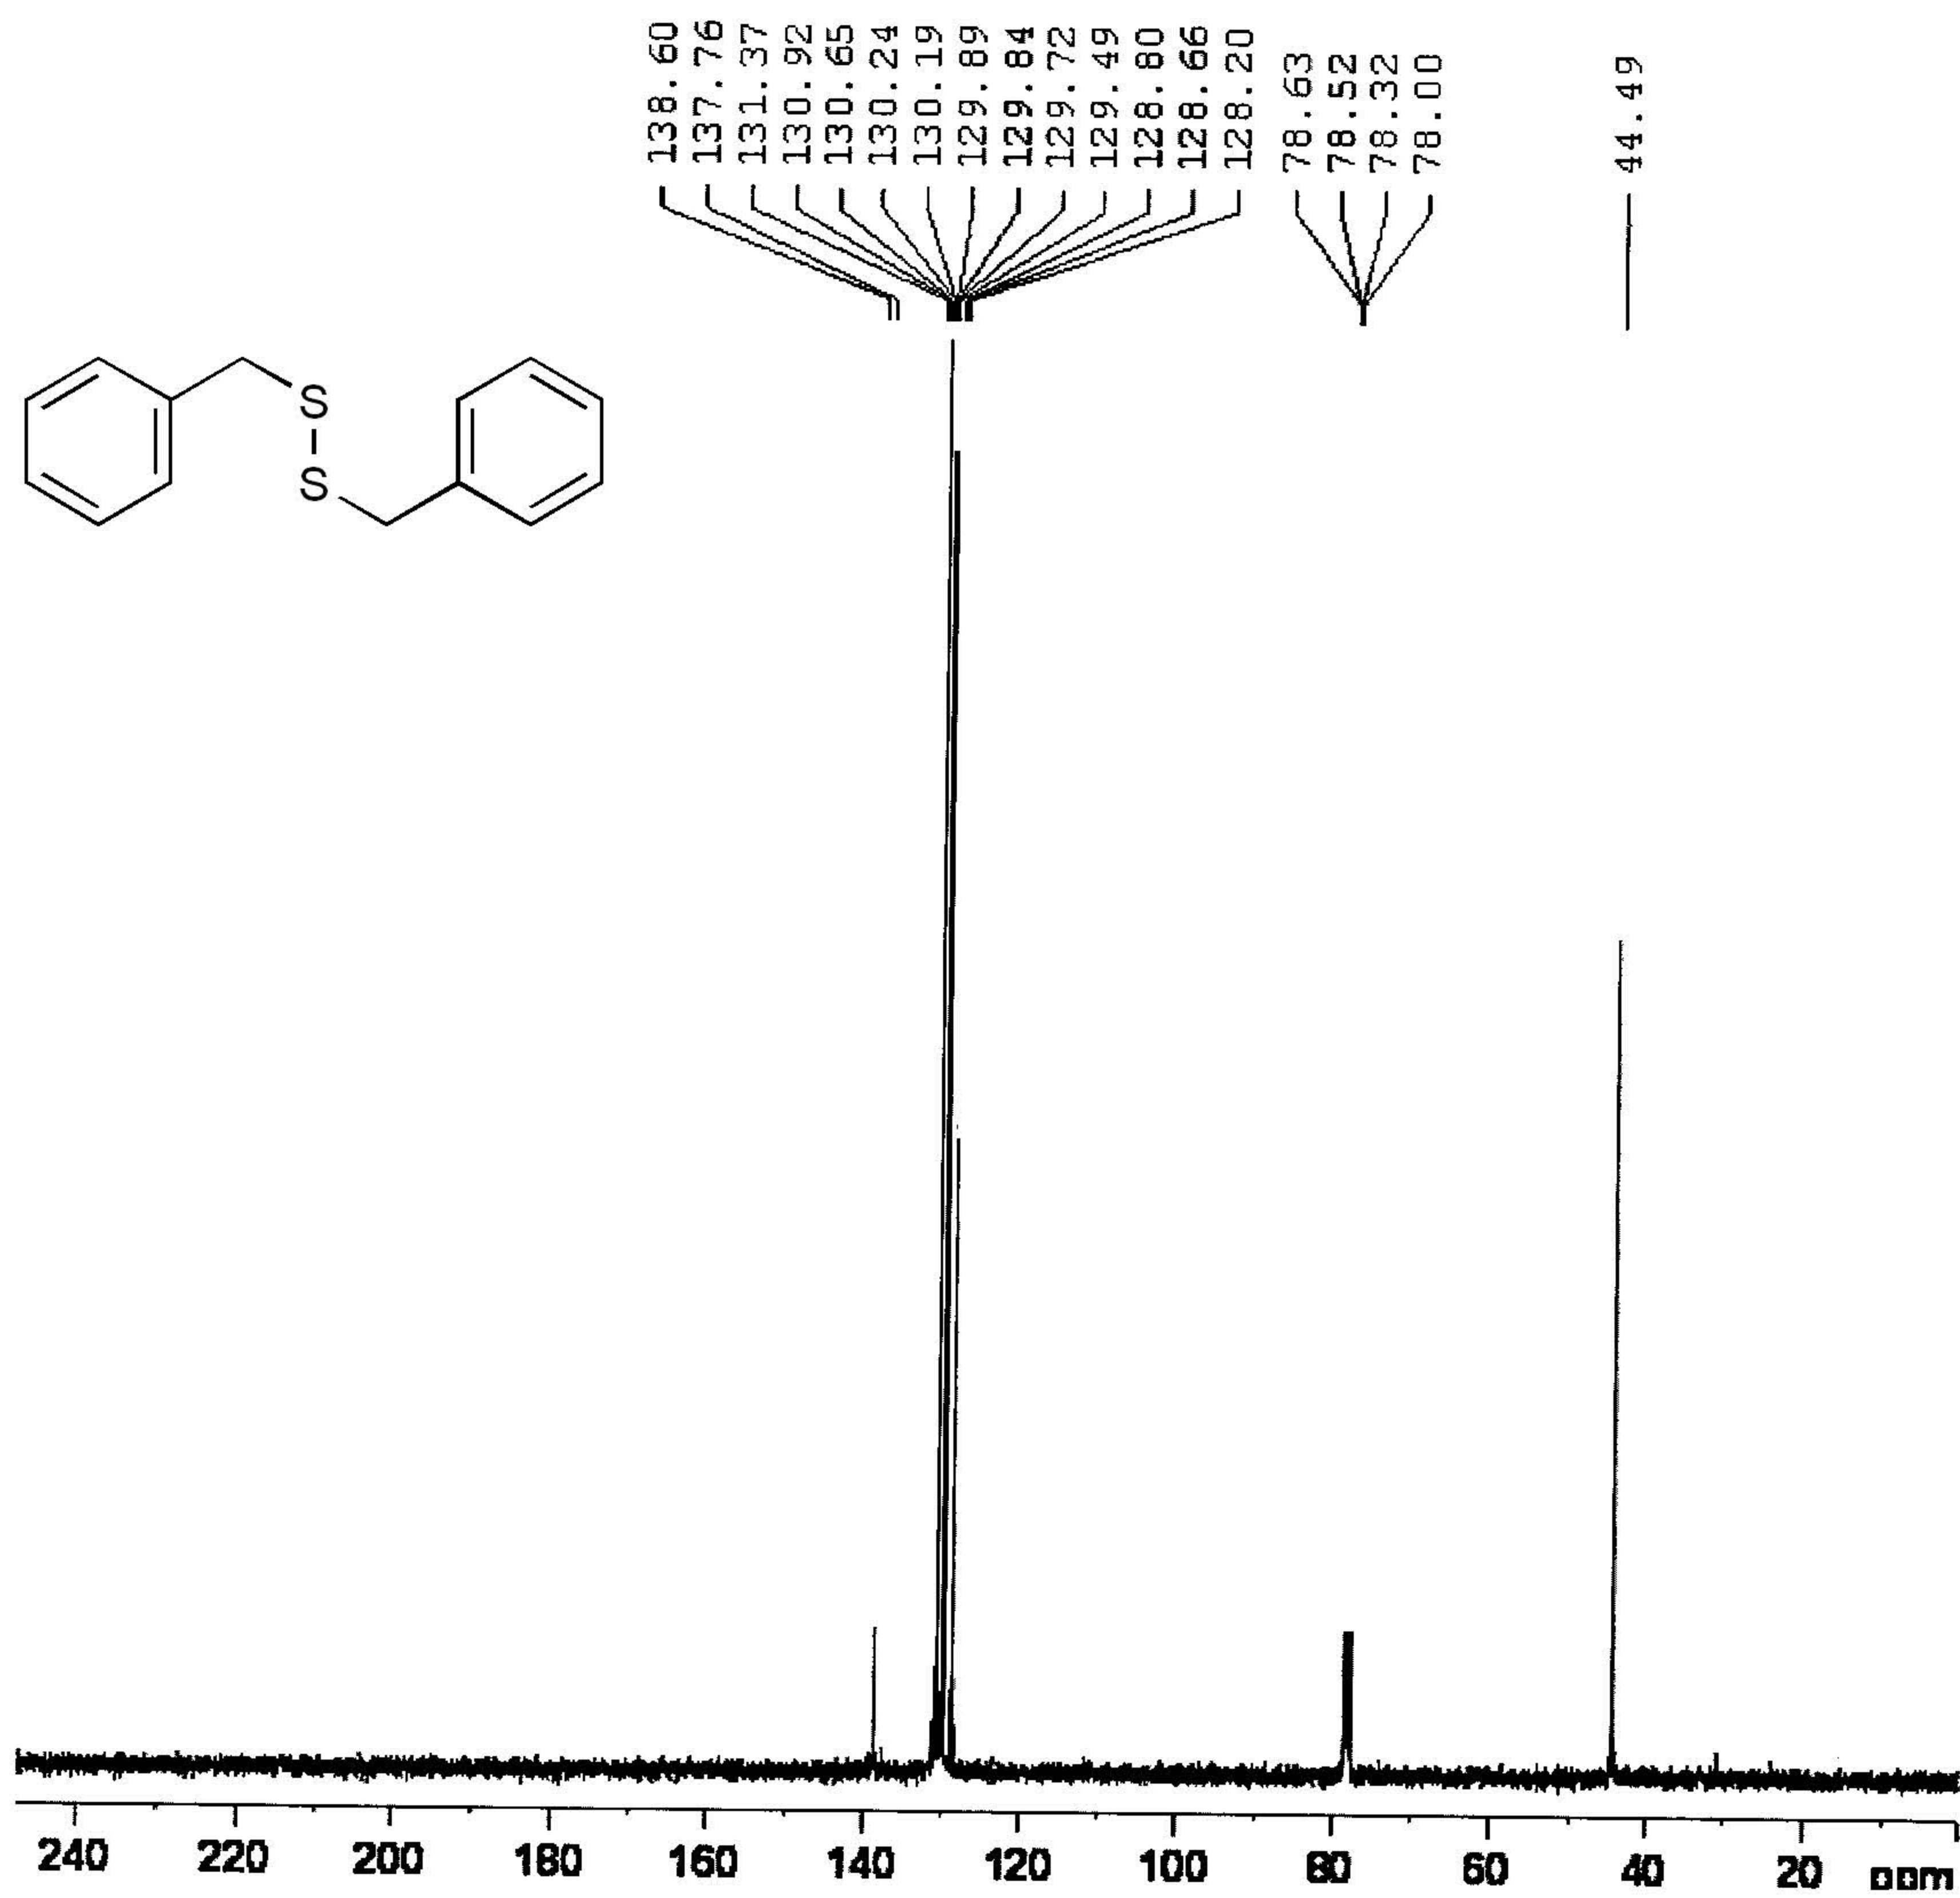

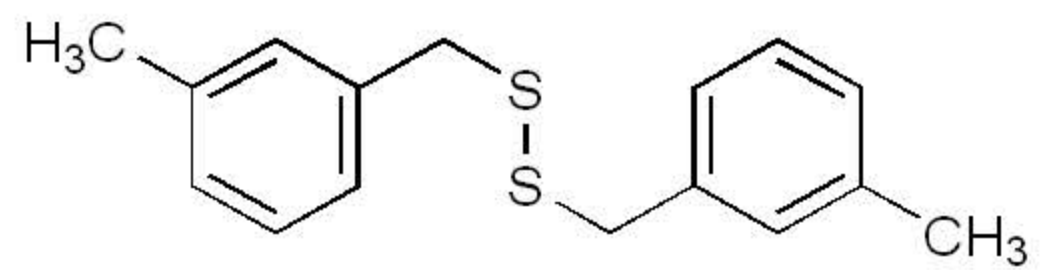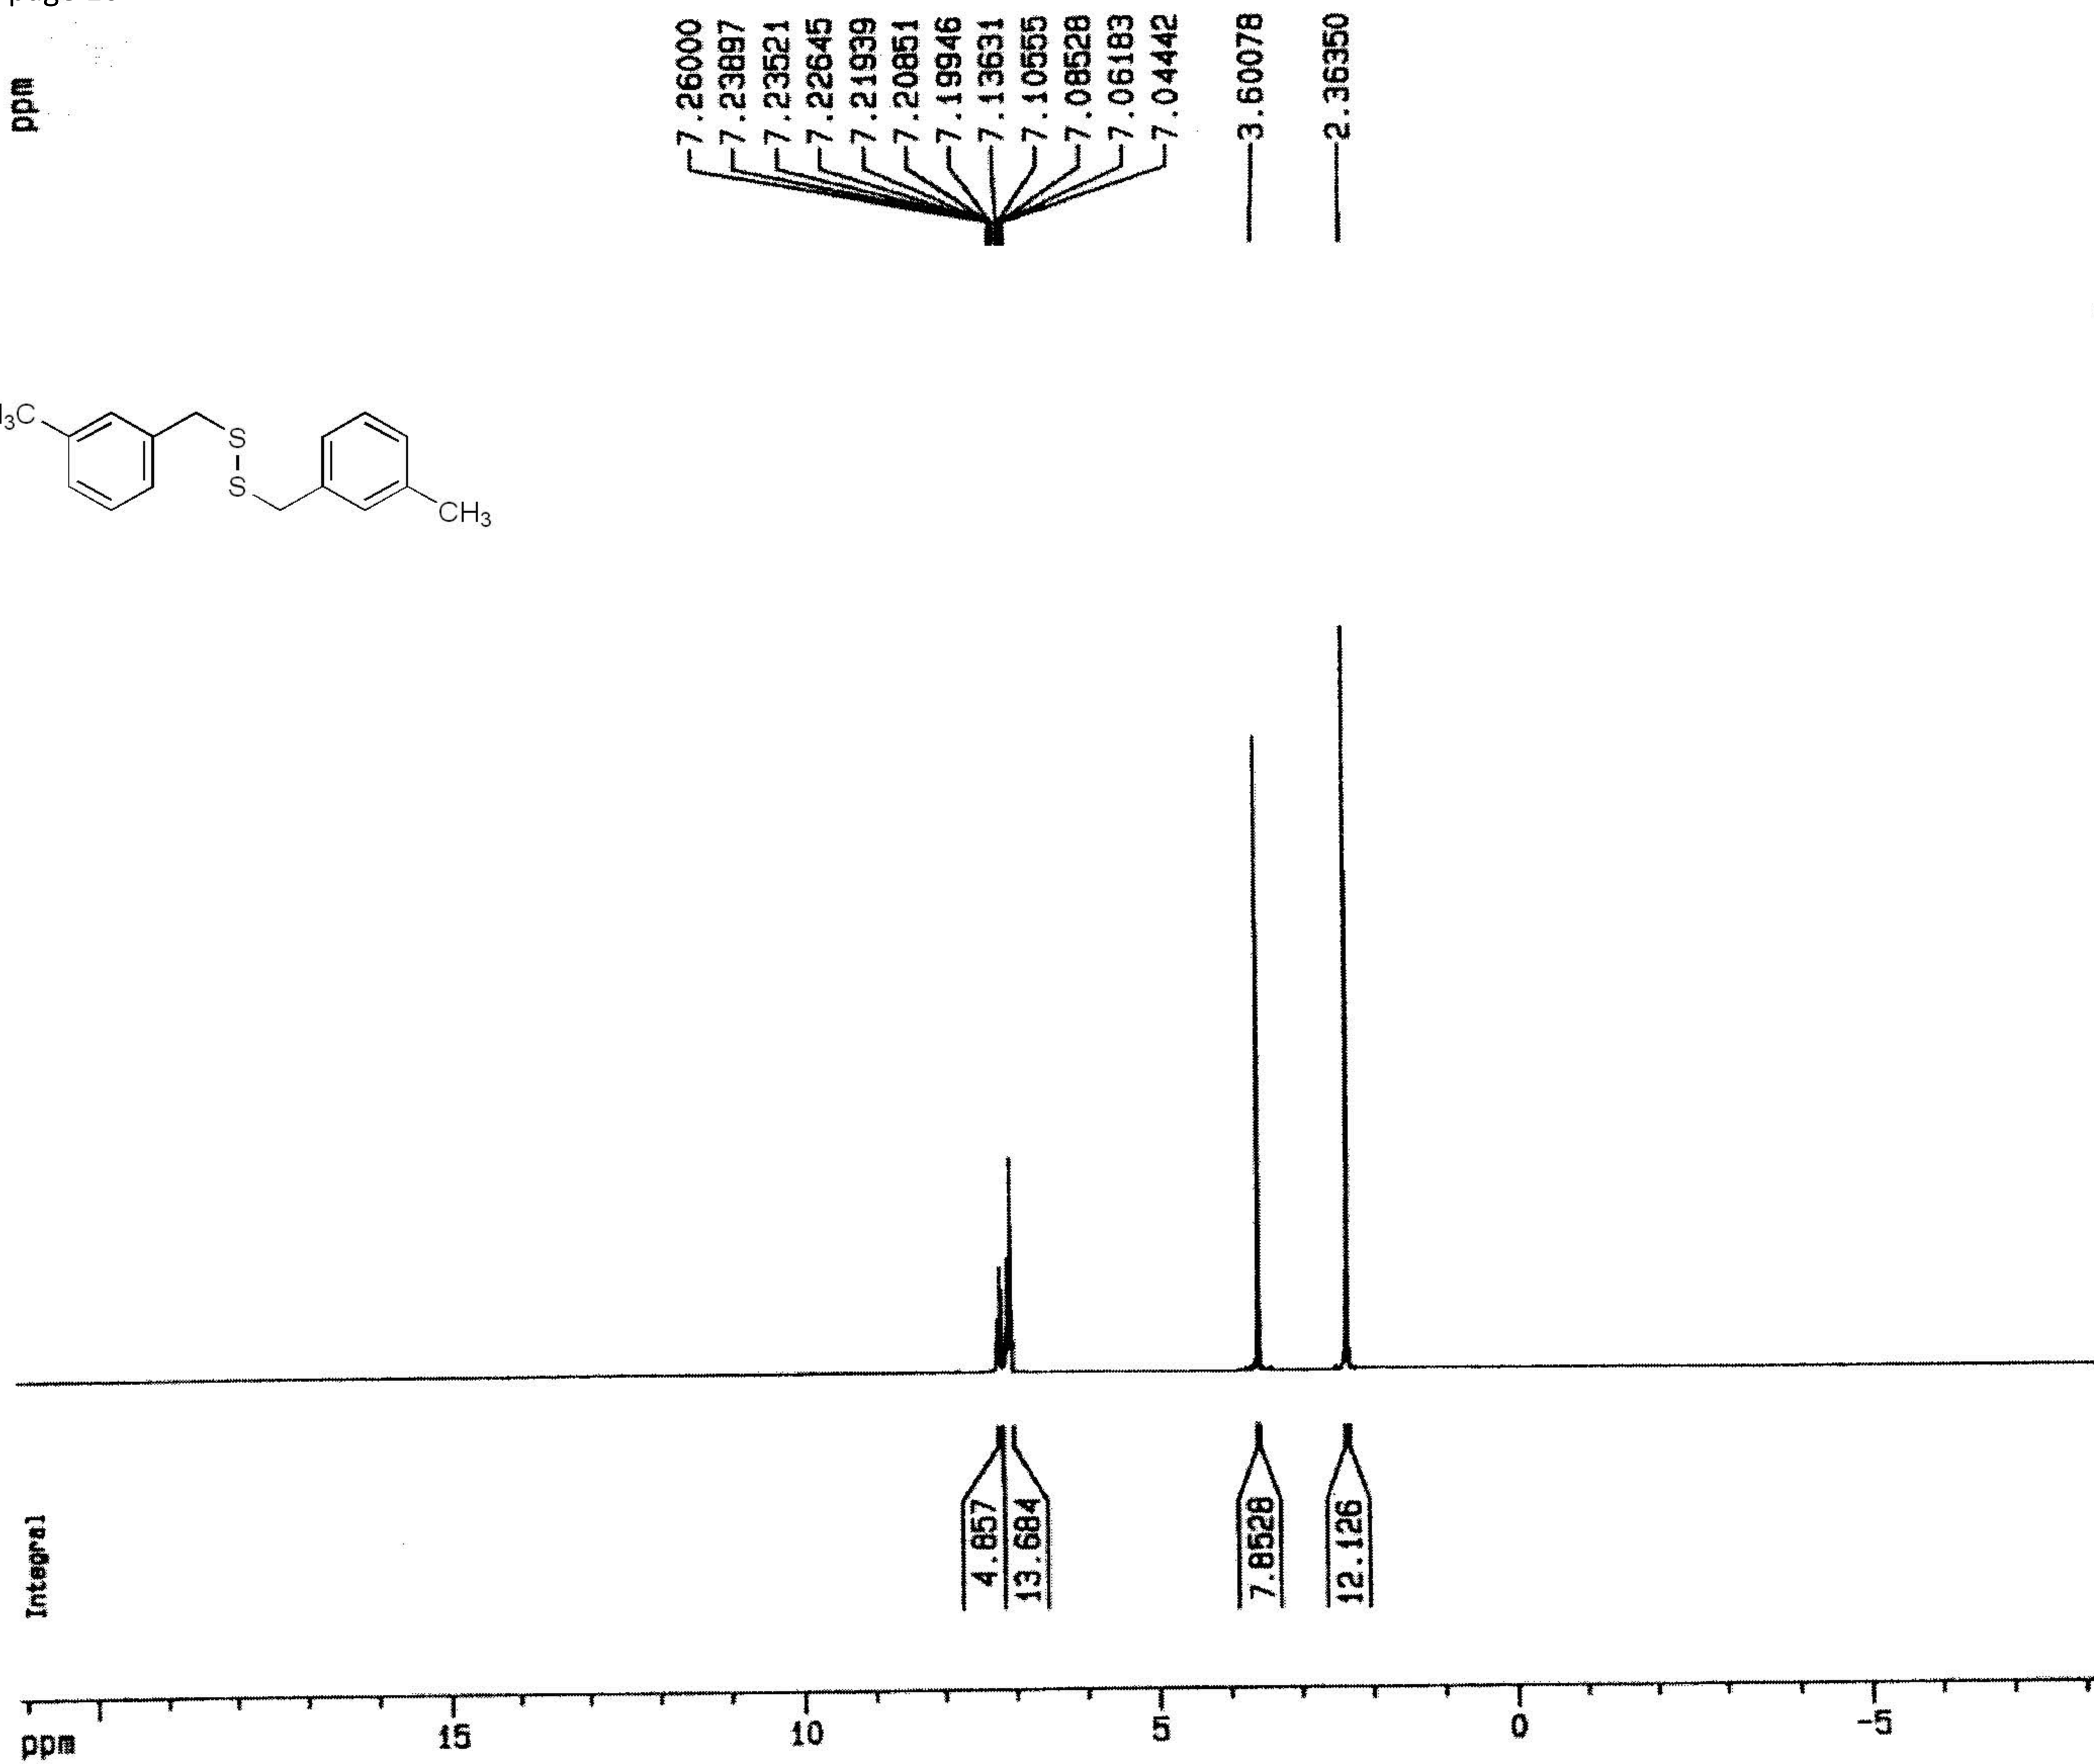

ppm

137.074  
136.204  
129.138  
128.725  
127.482  
127.357  
127.290  
127.168  
126.696  
125.419  
125.020

76.317  
76.000  
75.683

42.302

20.357

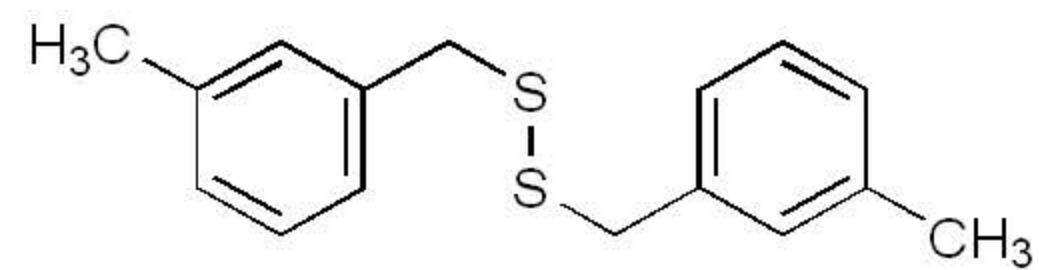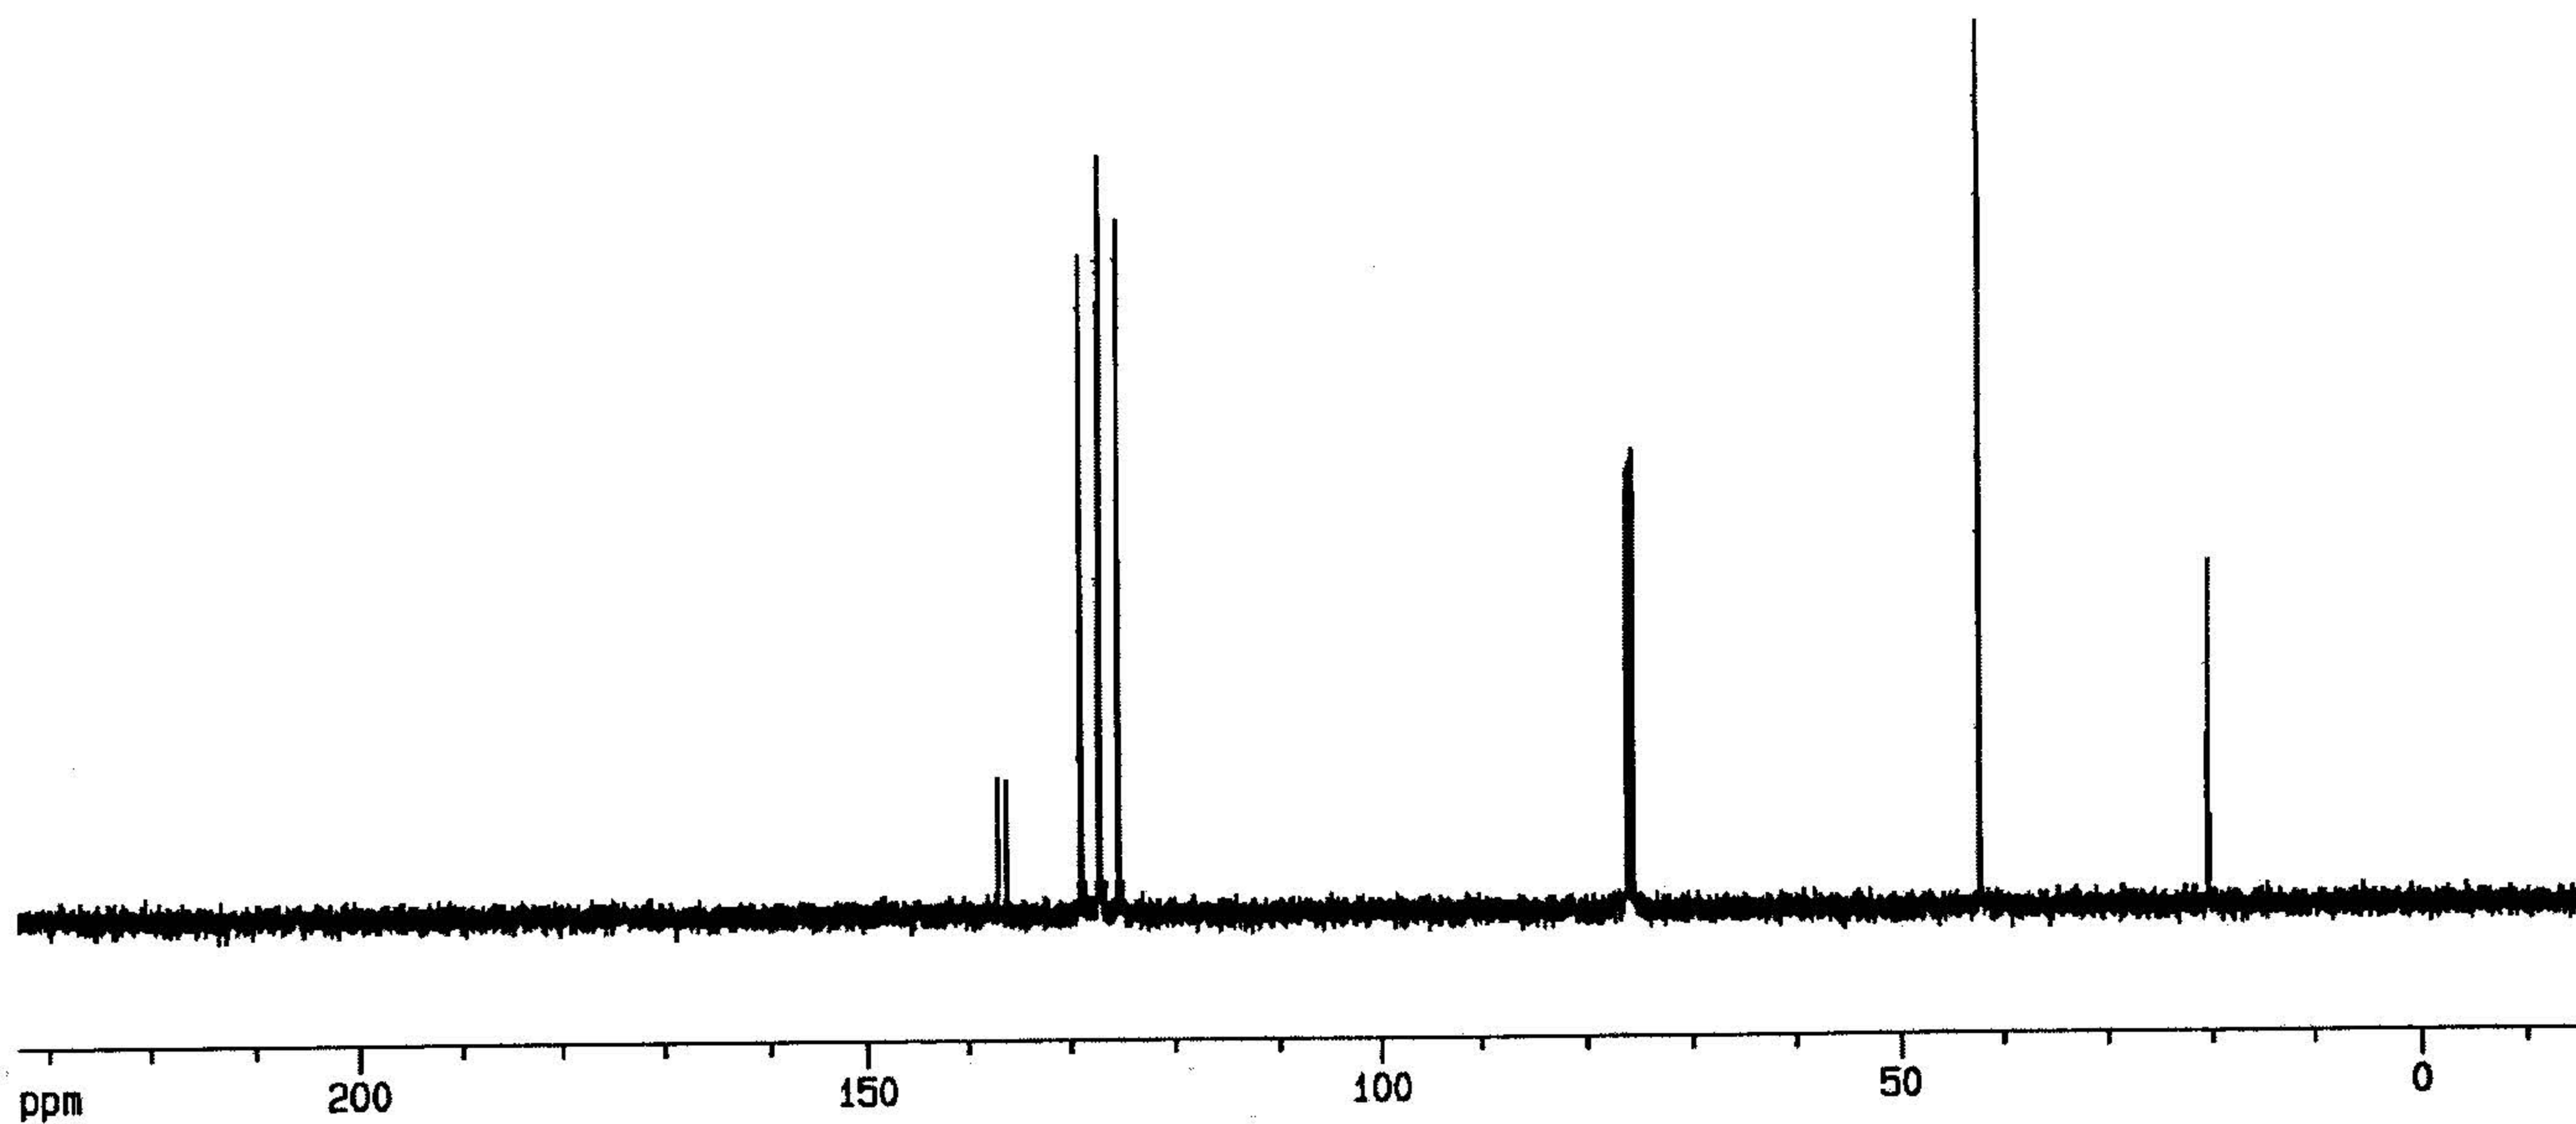

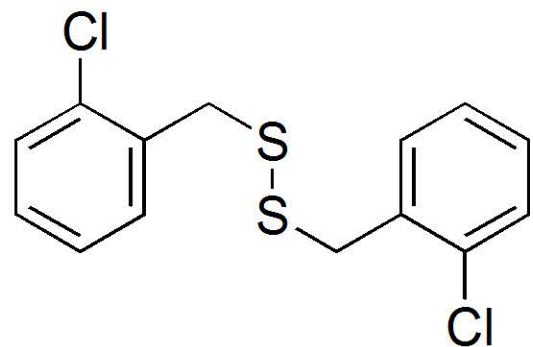

7.399  
7.386  
7.381  
7.373  
7.362  
7.352  
7.300  
7.292  
7.275  
7.265  
7.261  
7.255  
7.244  
7.241  
7.228  
7.222  
7.205  
7.190  
7.182

3.791

2.20

1.00

ppm (t1)

10.0

5.0

0.0

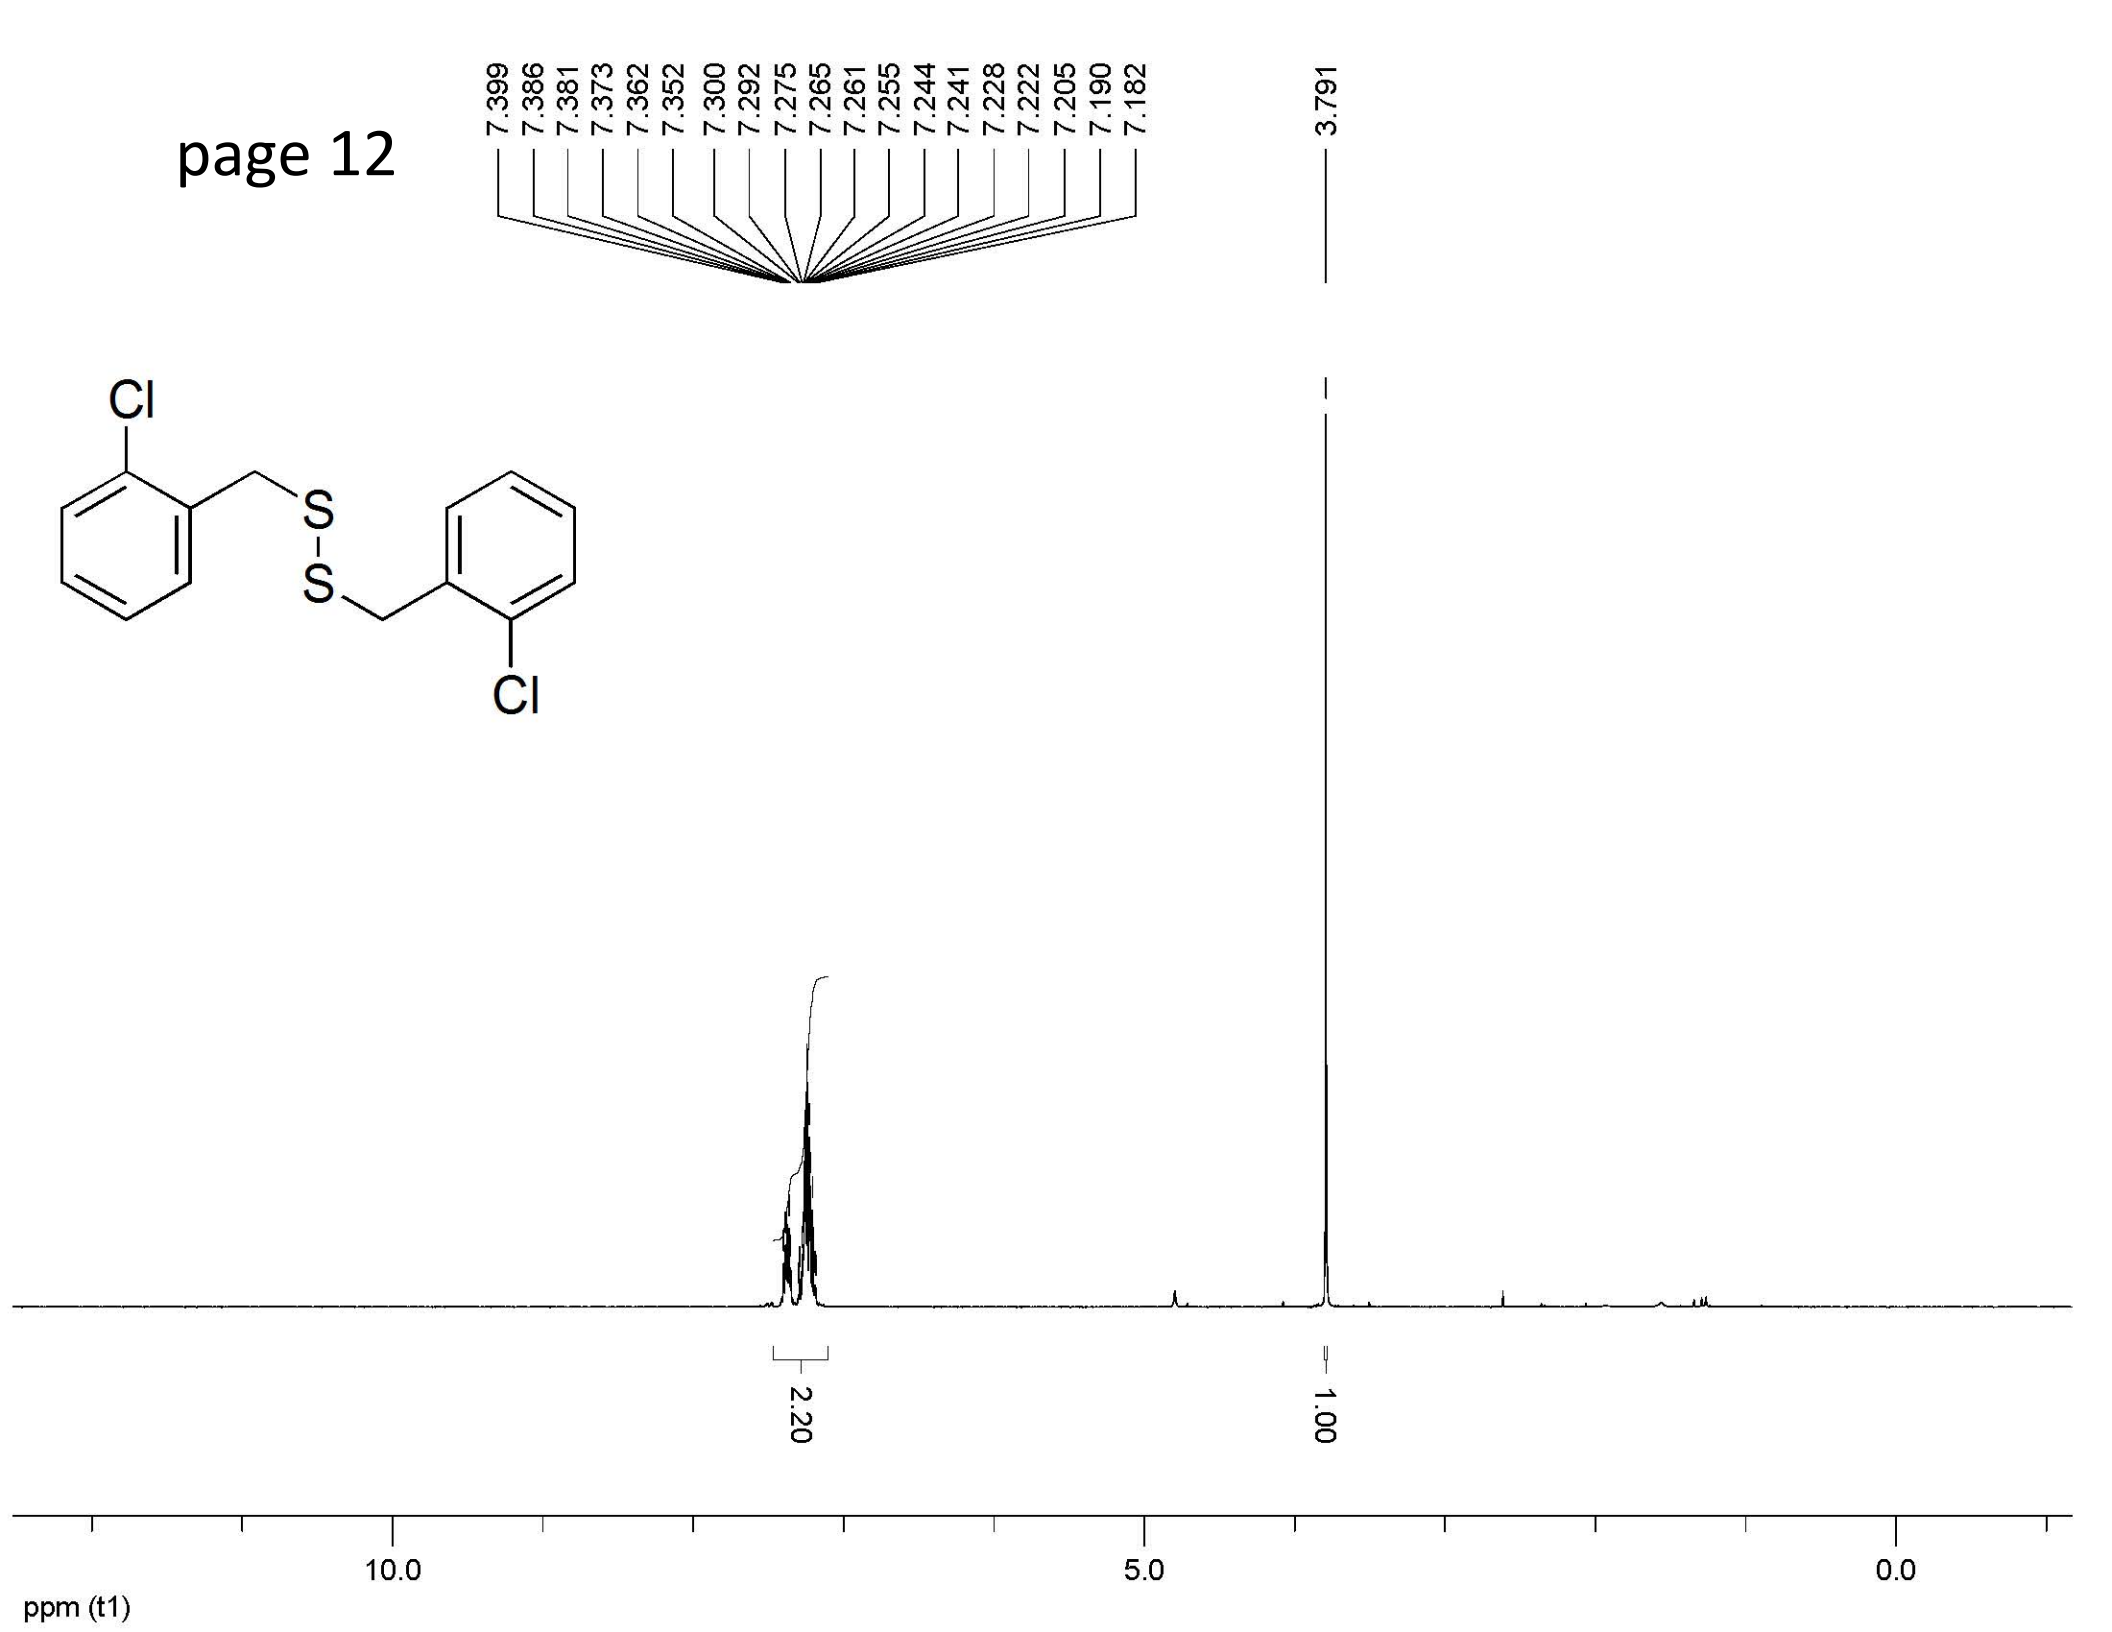

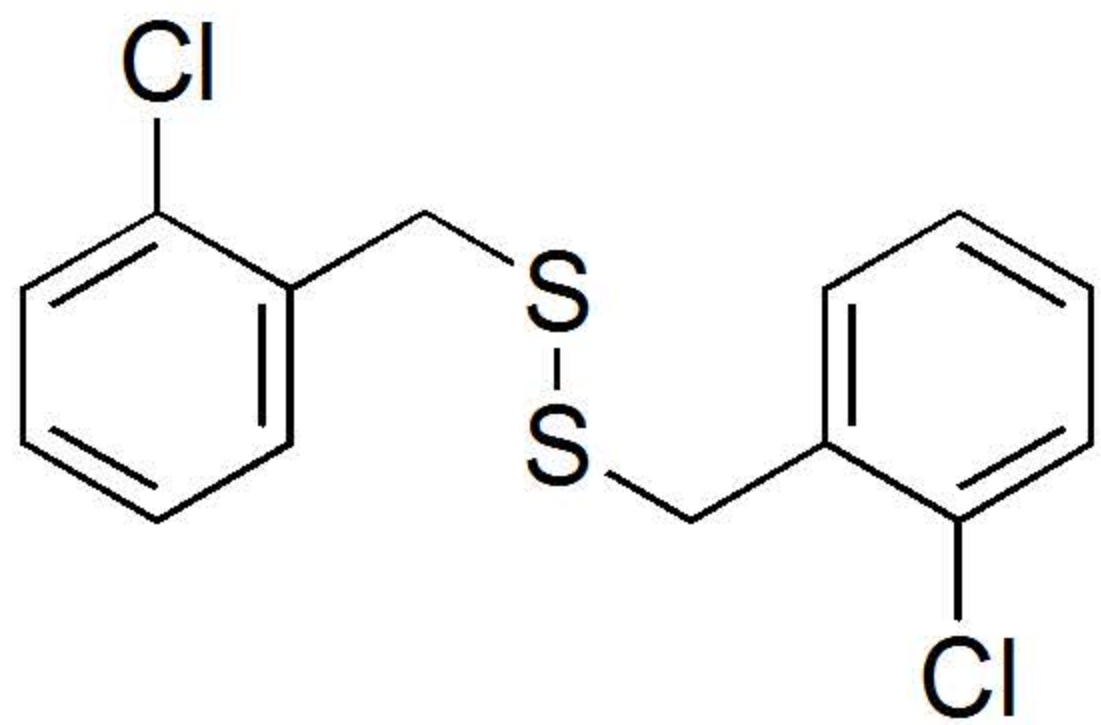

134.979  
134.130  
131.582  
129.732  
128.946  
126.713

77.530  
77.022  
76.515

41.077

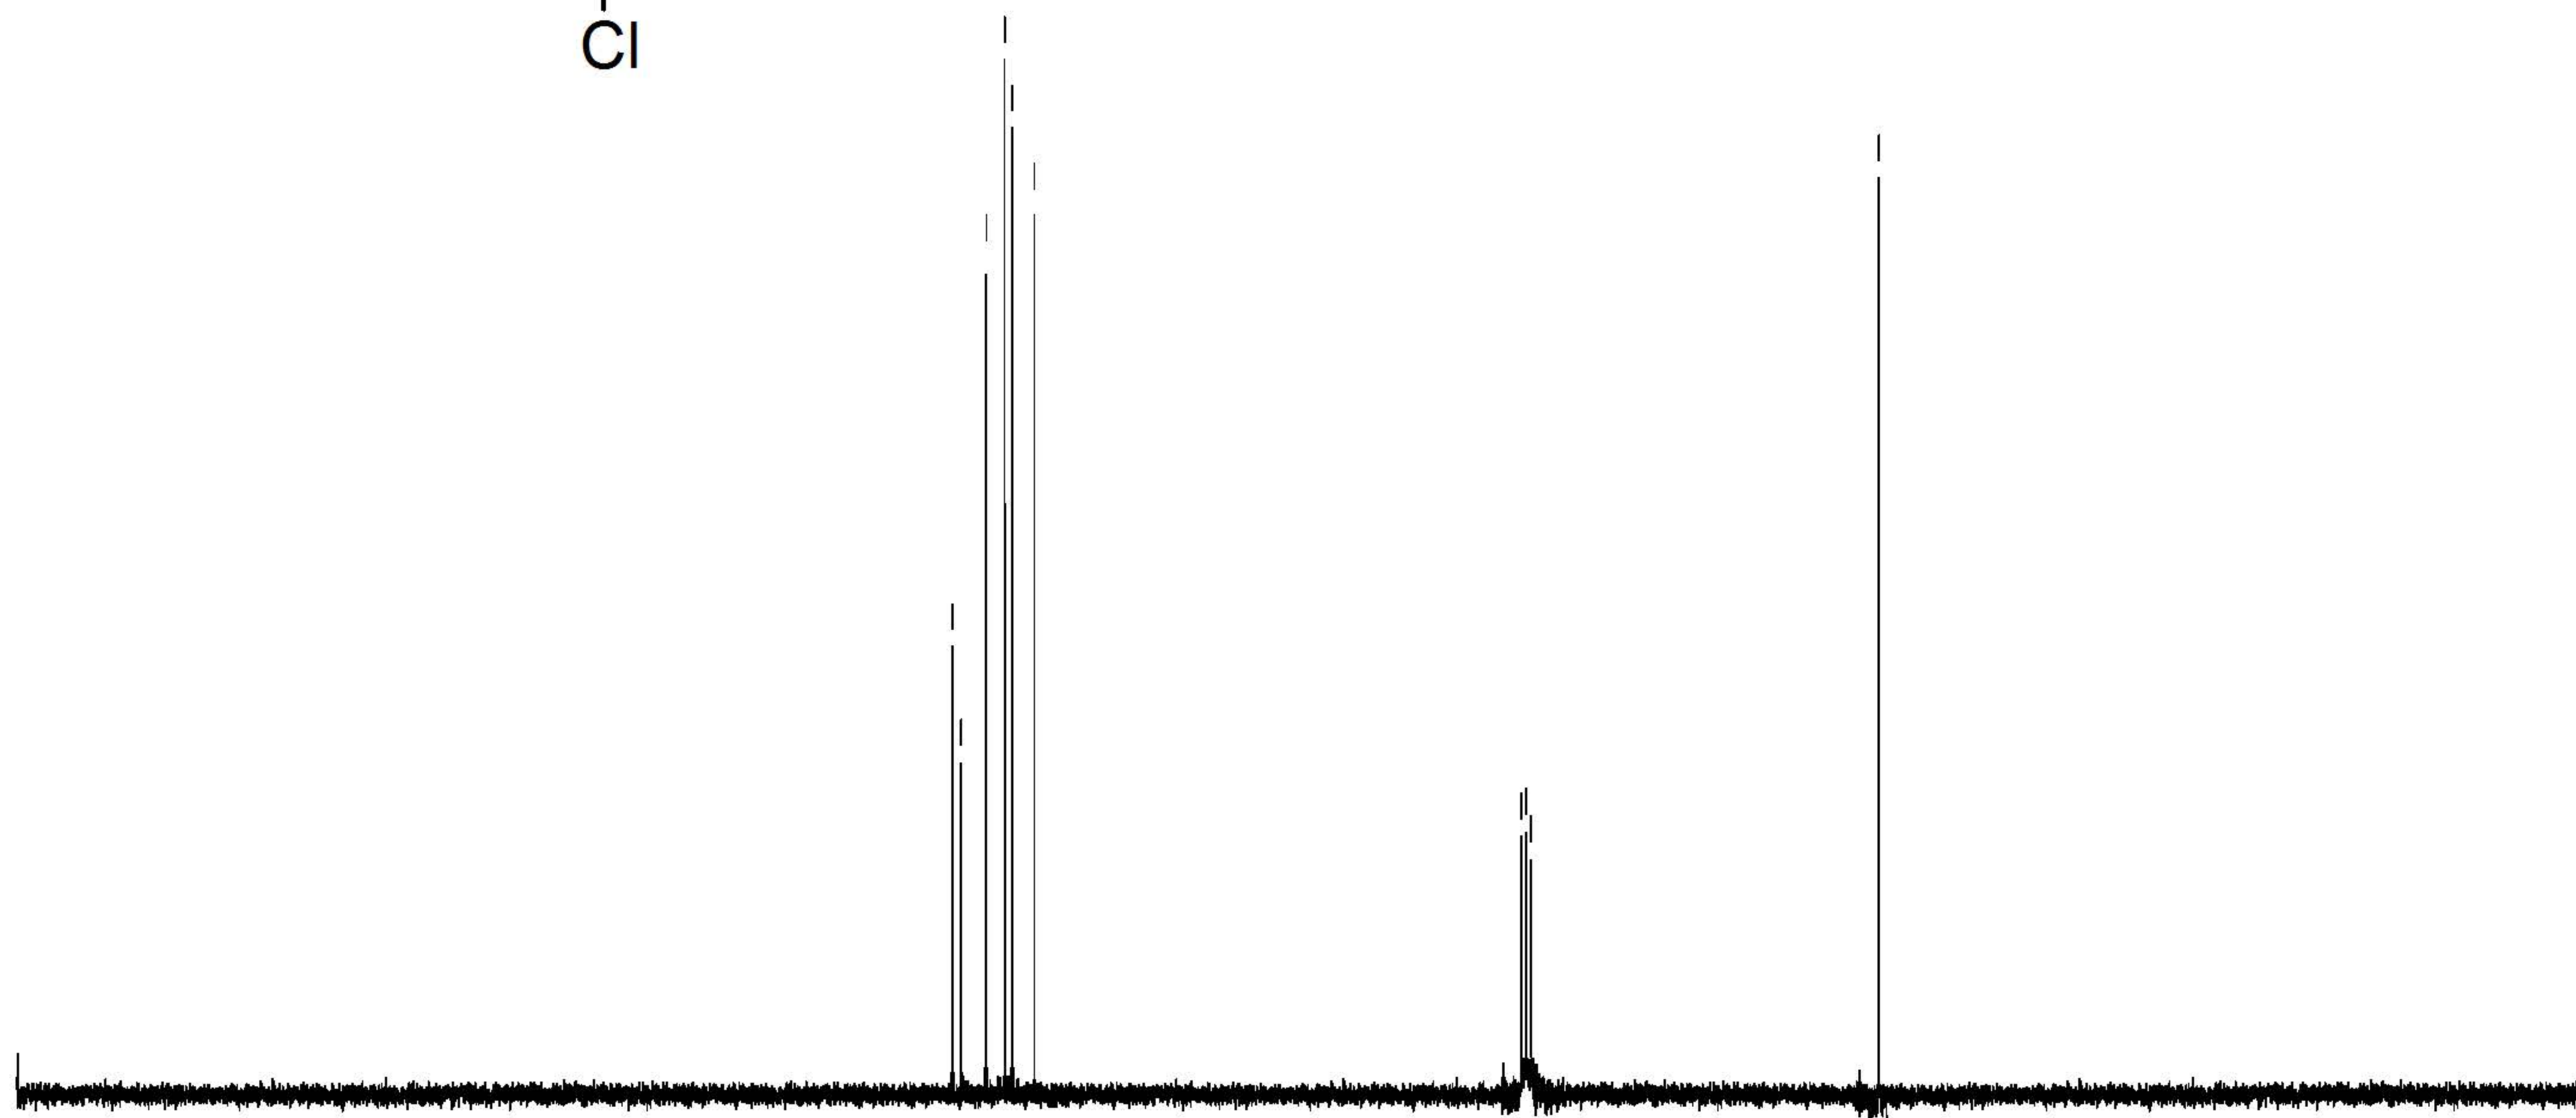

200

150

100

50

0

ppm (t1)

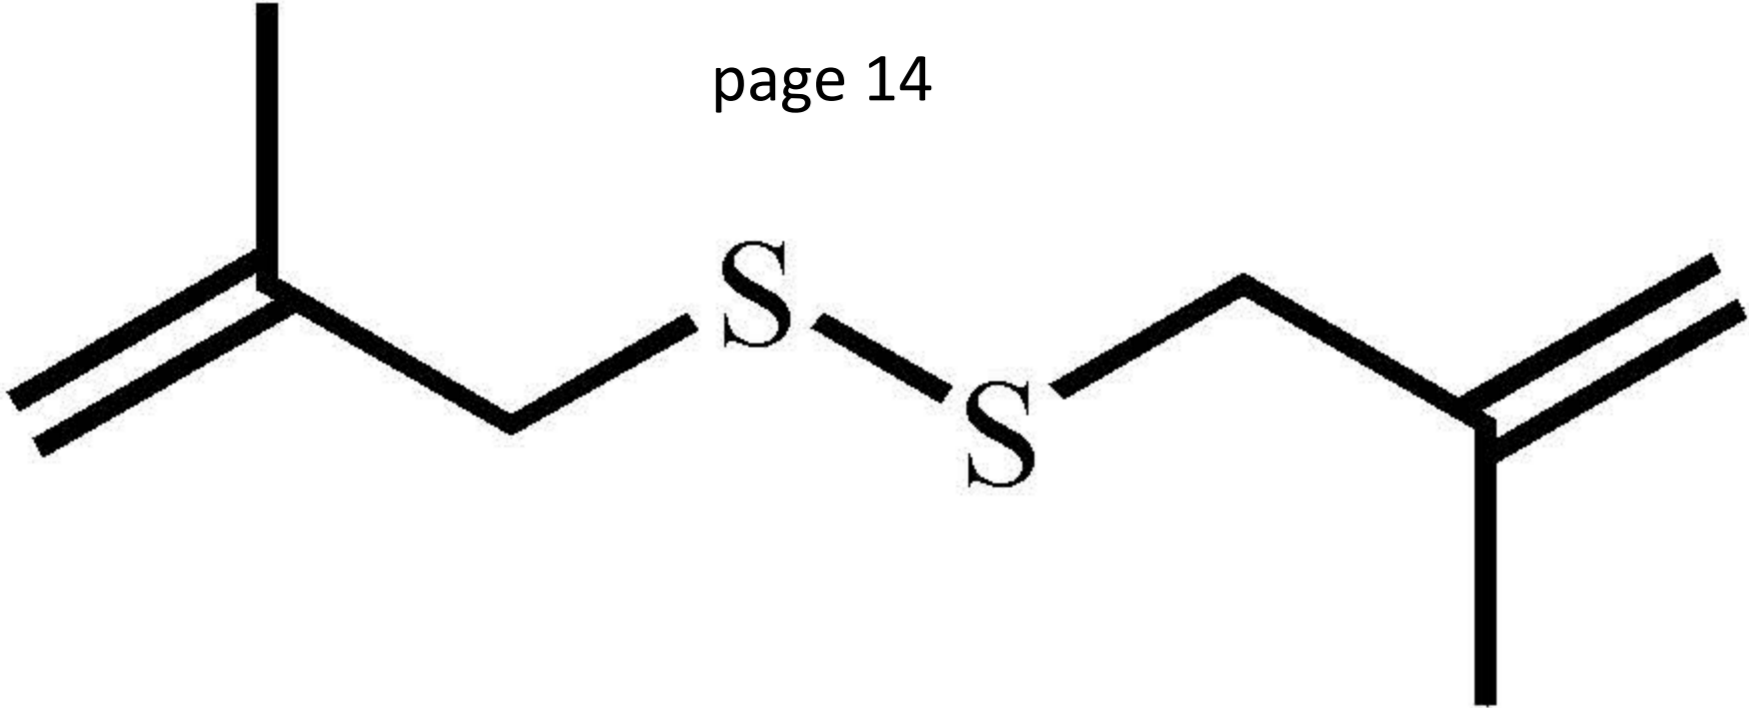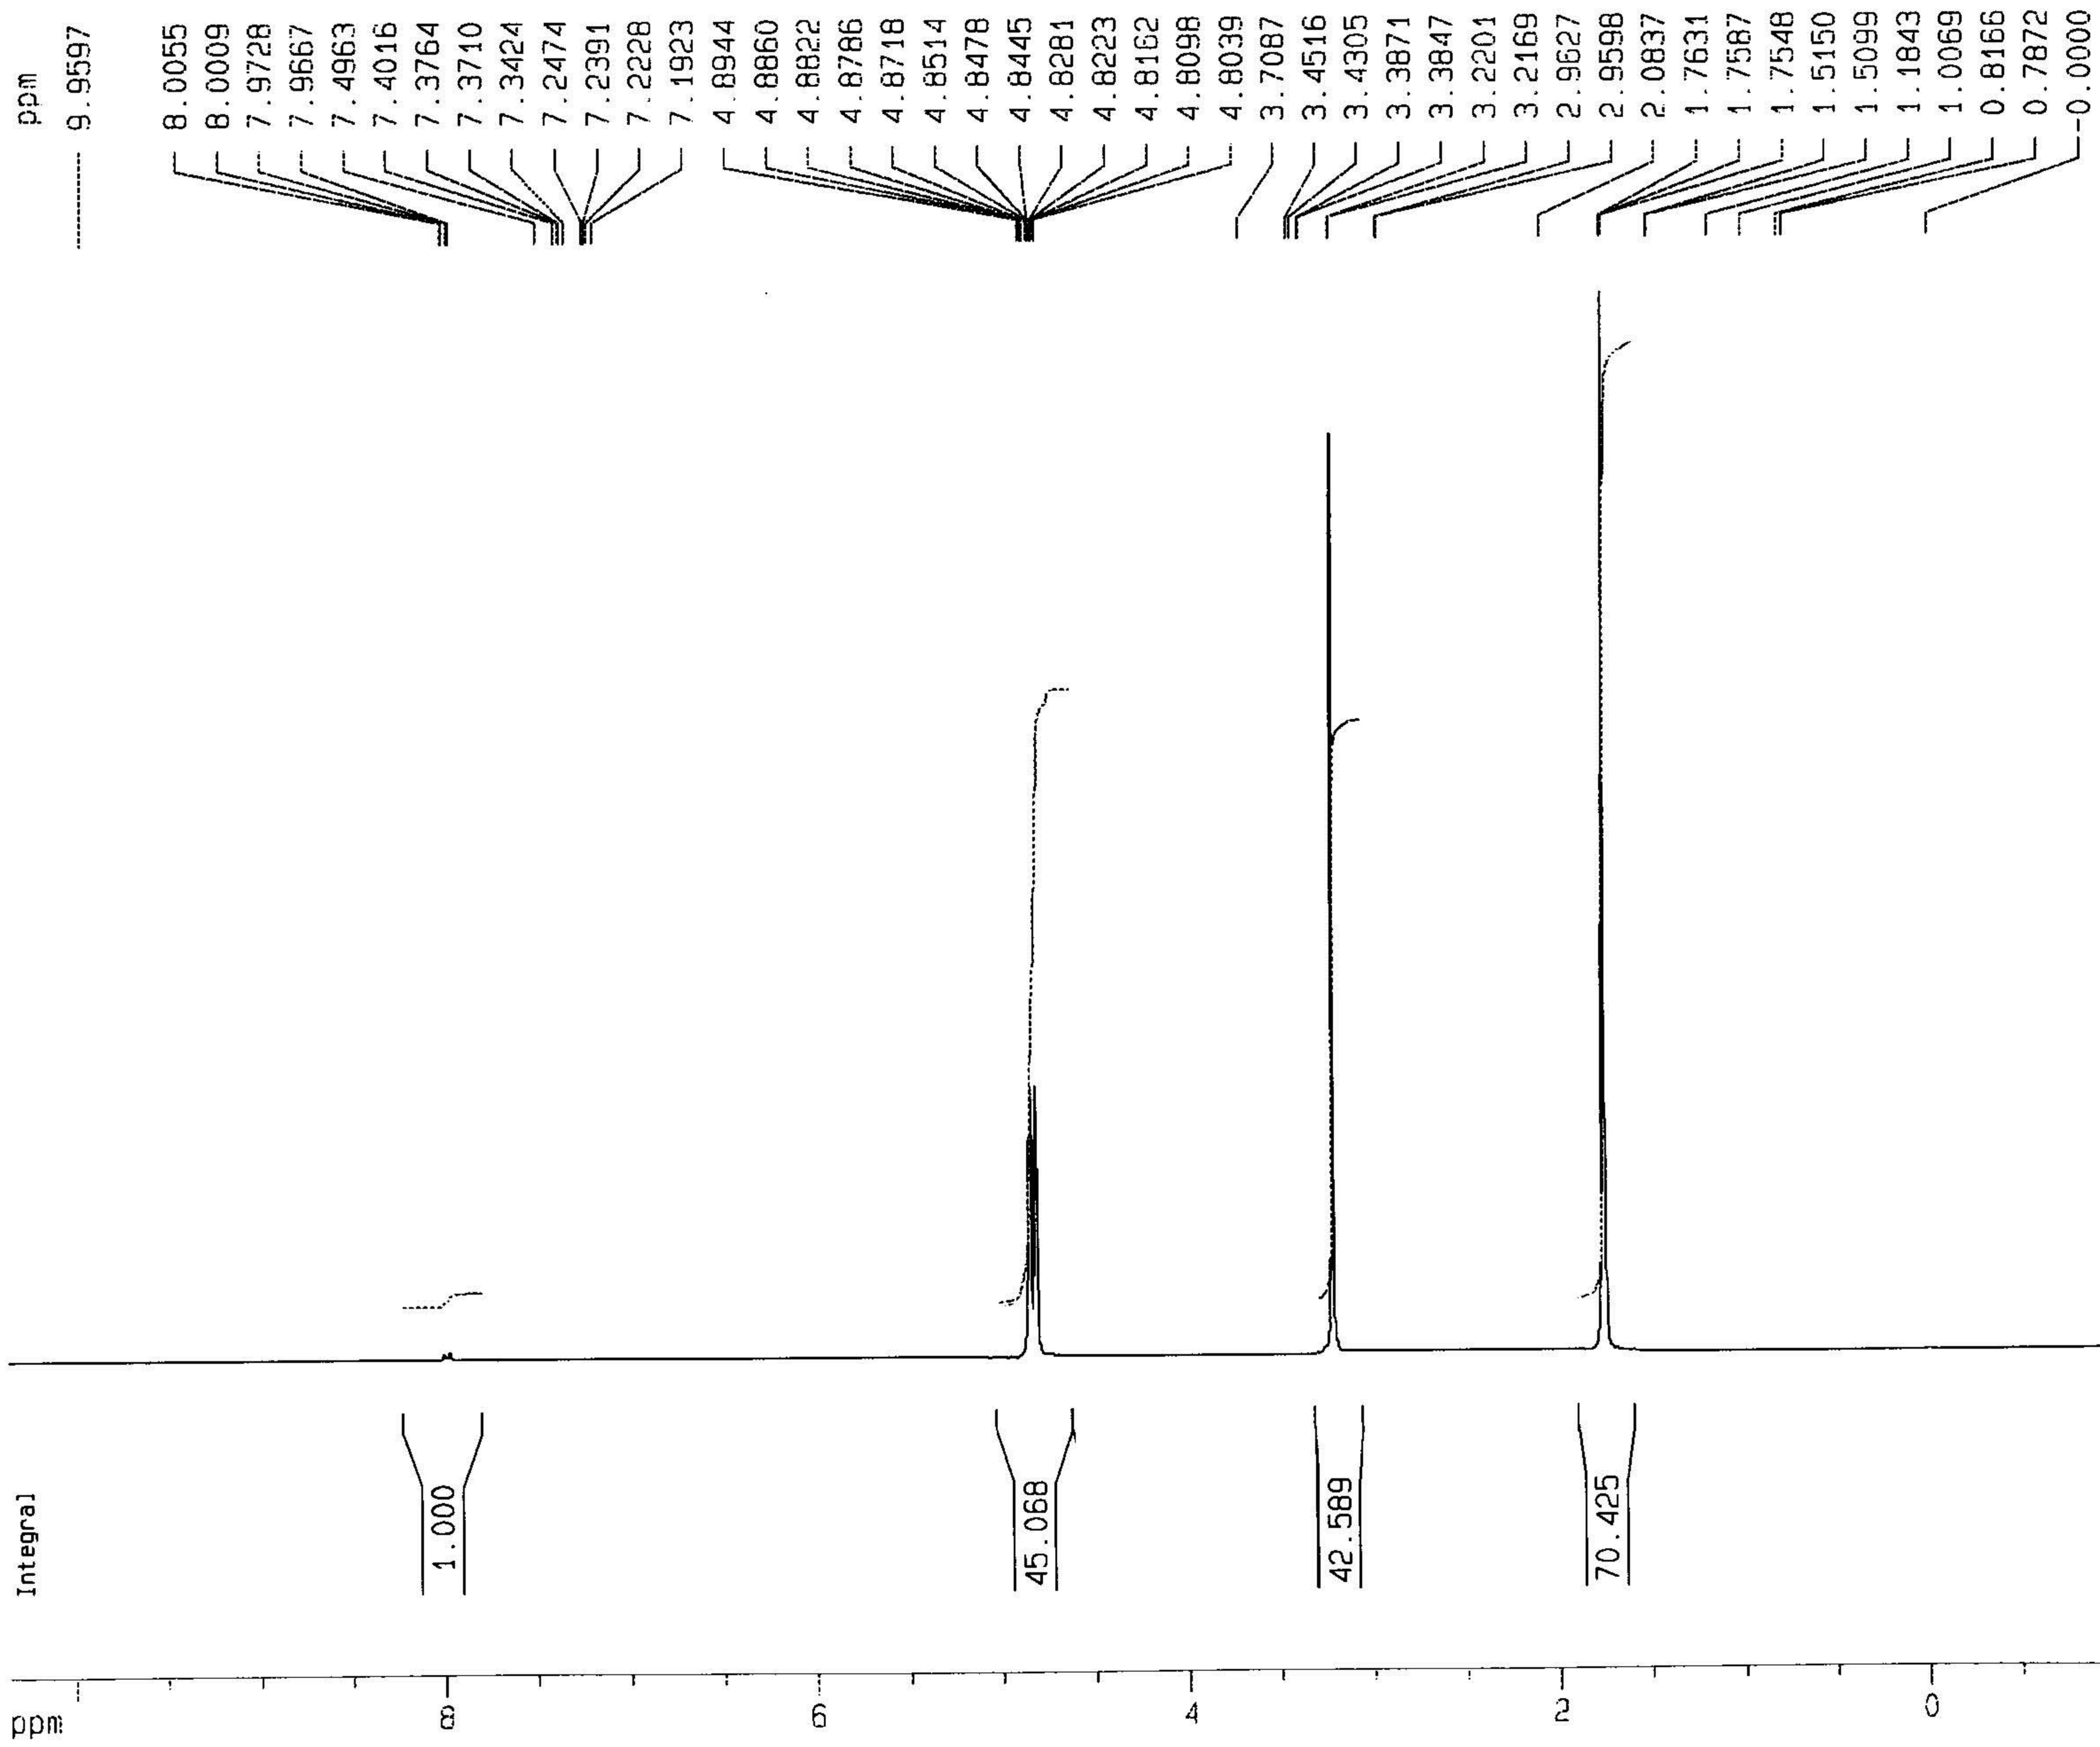

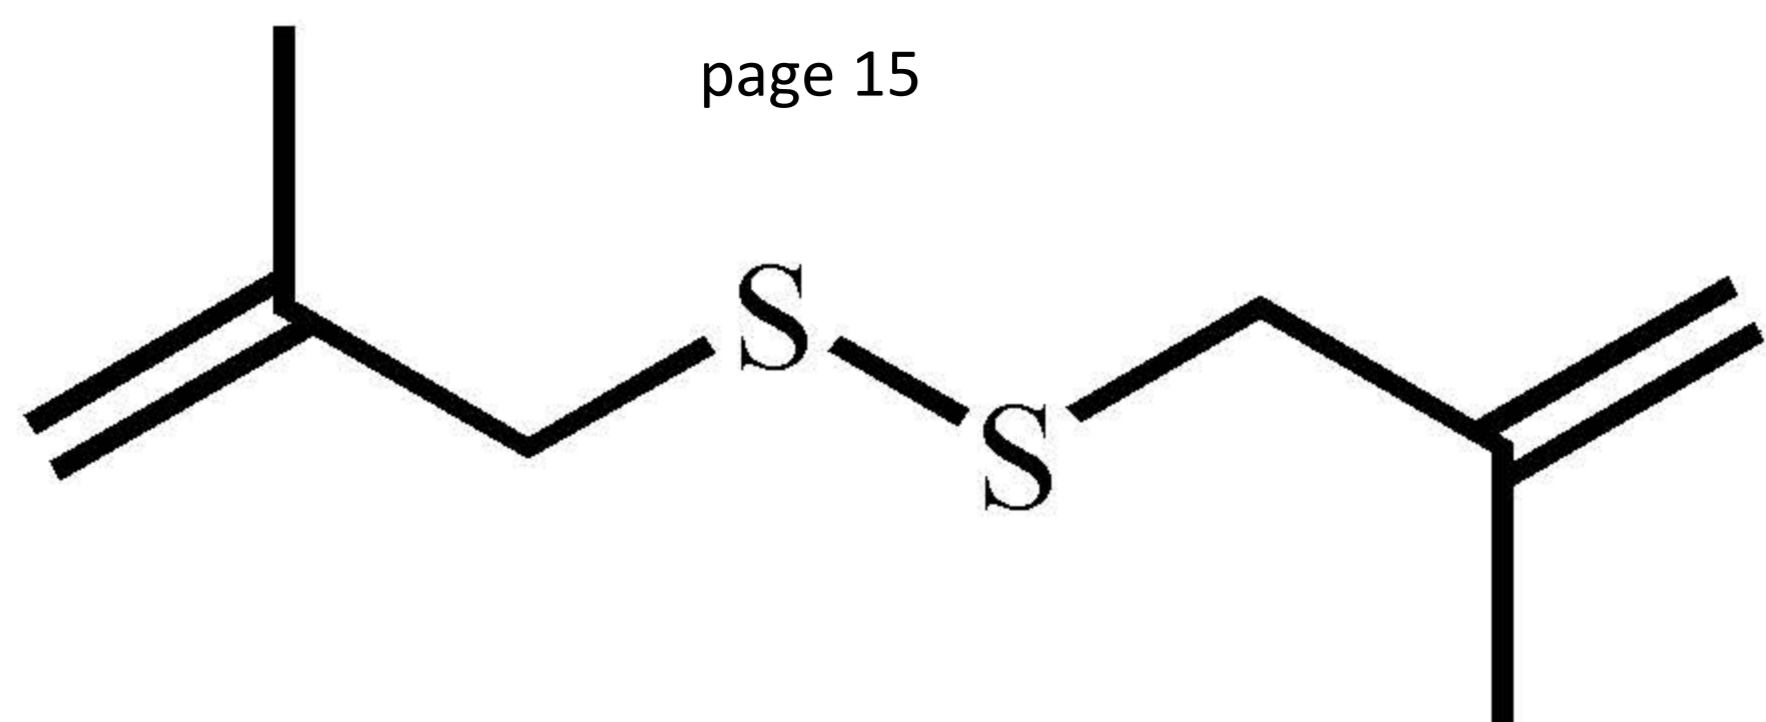

ppm

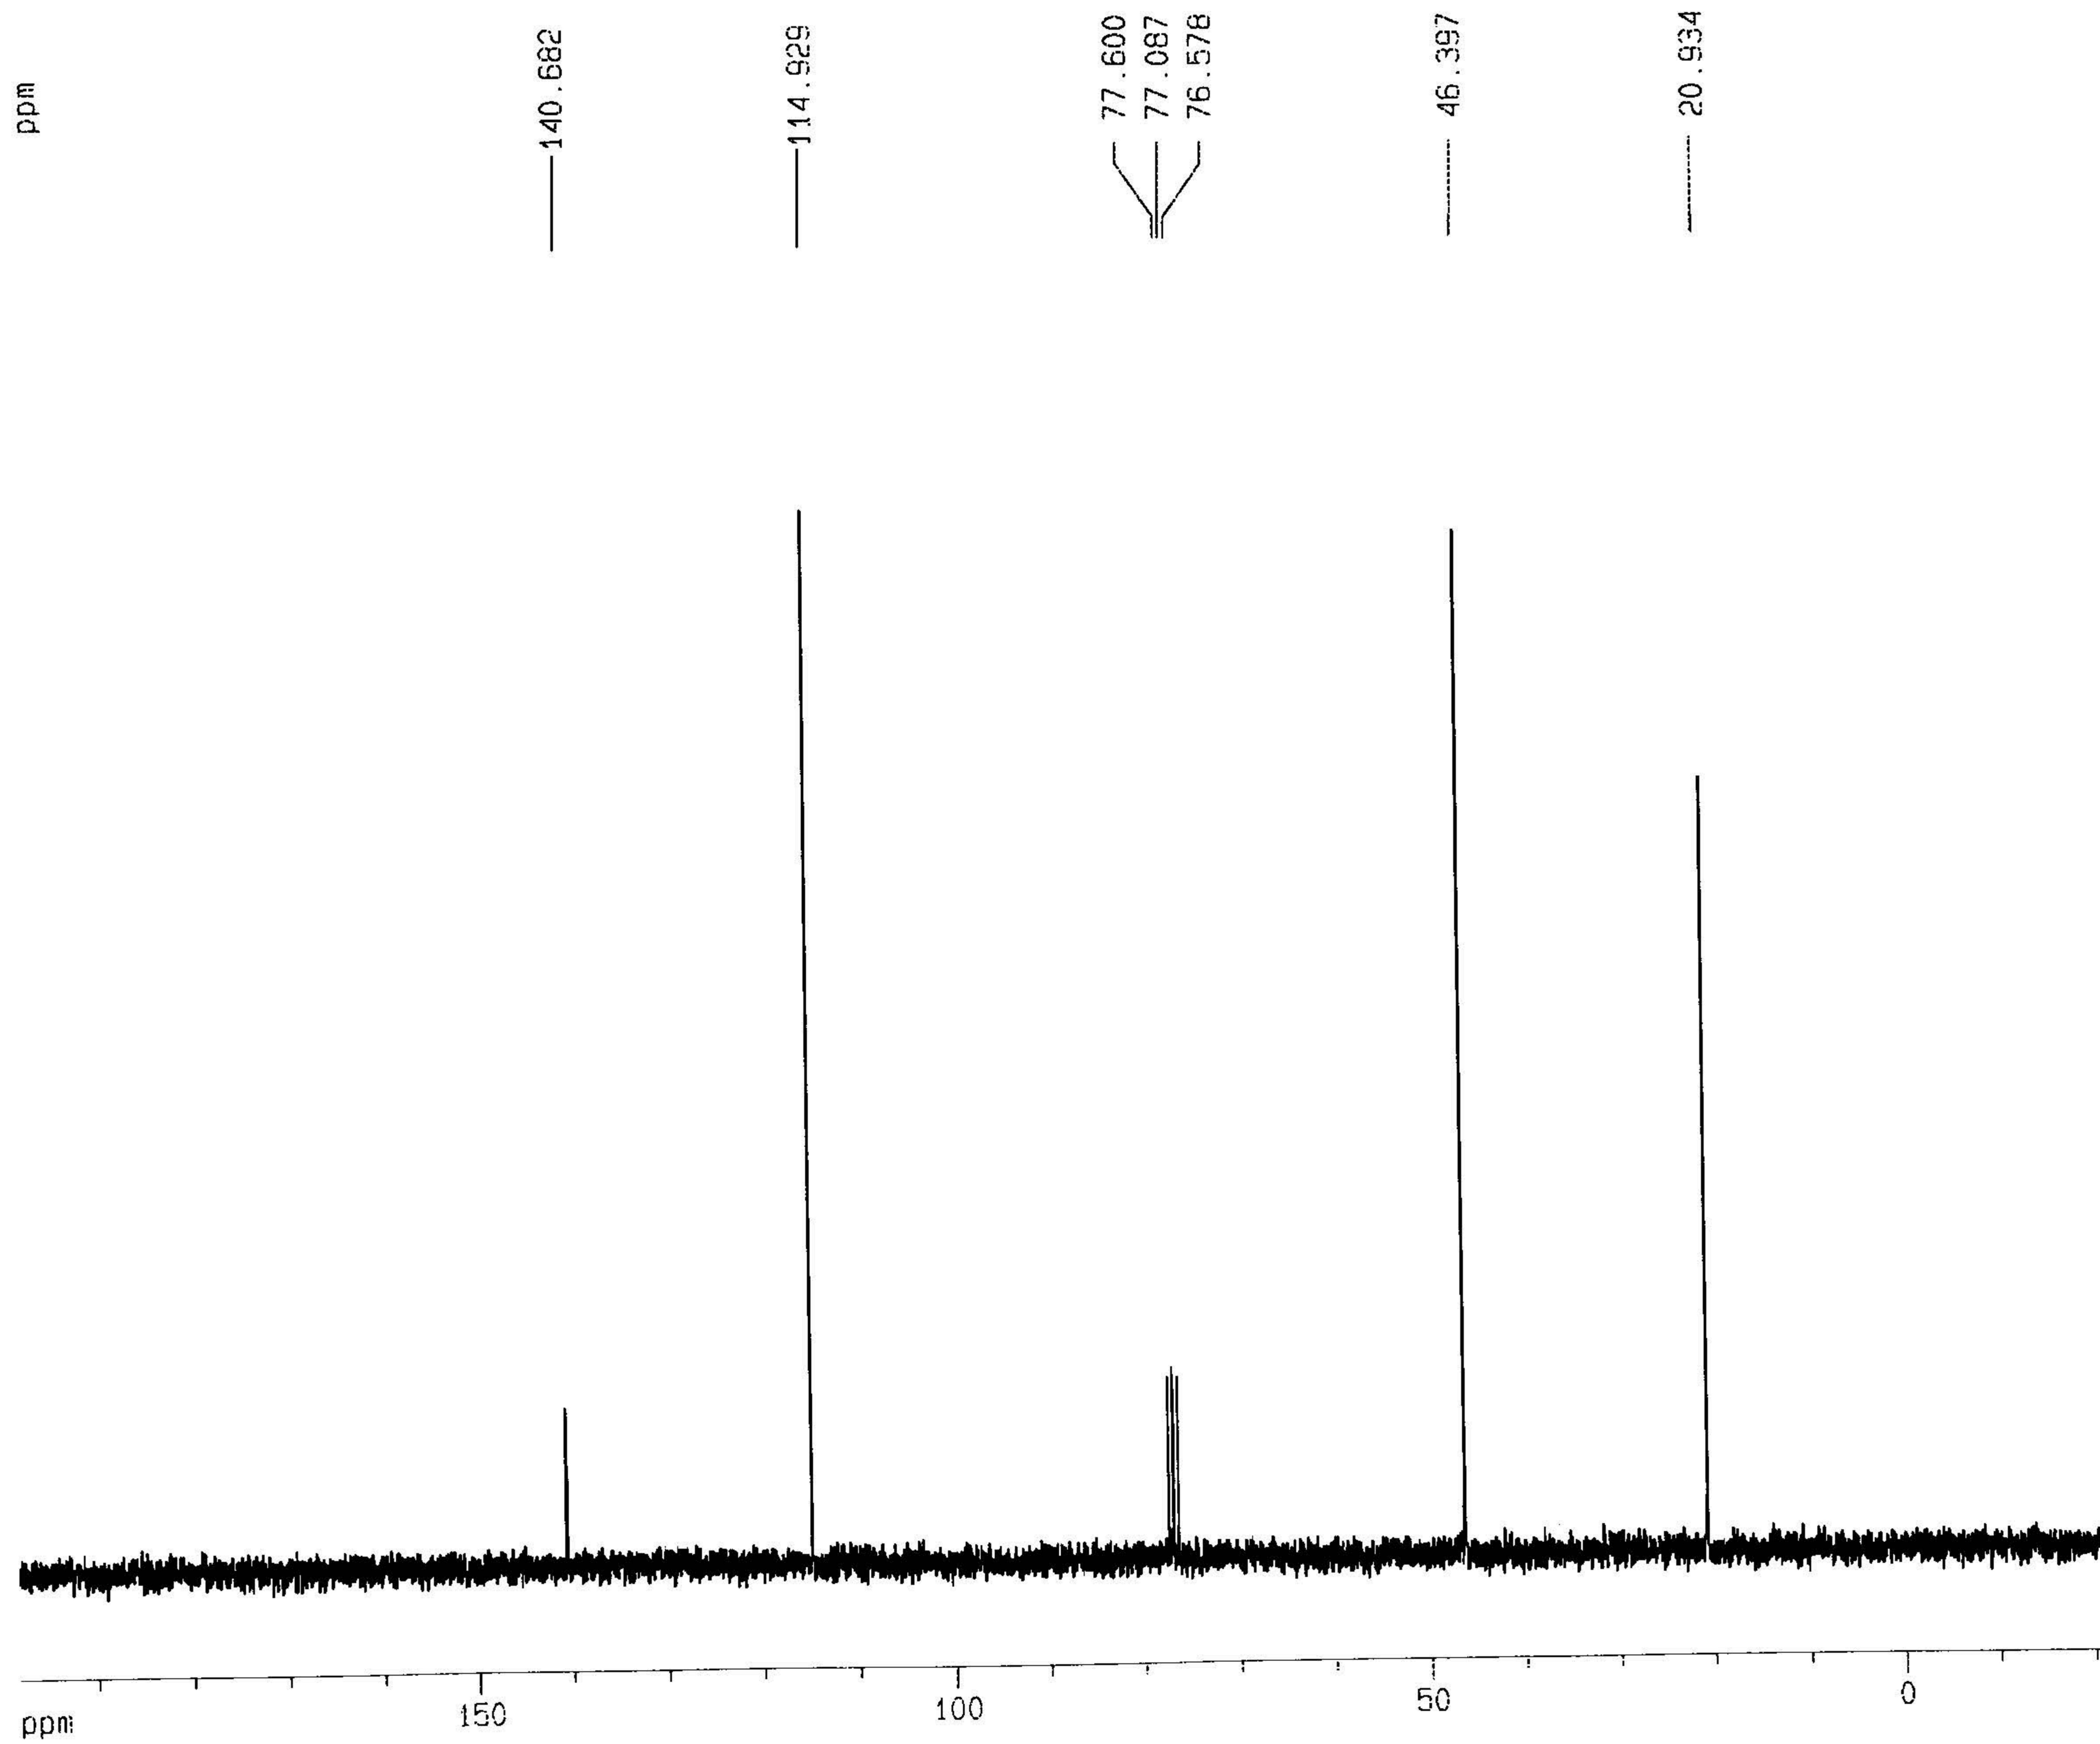



ppm

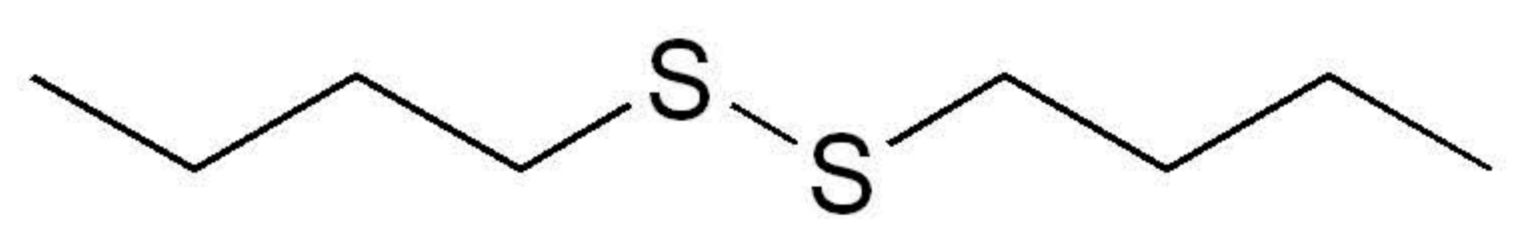

2.71701  
2.68810  
2.65810  
1.71109  
1.68371  
1.66201  
1.65553  
1.48175  
1.45950  
1.43031  
1.40181  
0.95500  
0.92634  
0.89631

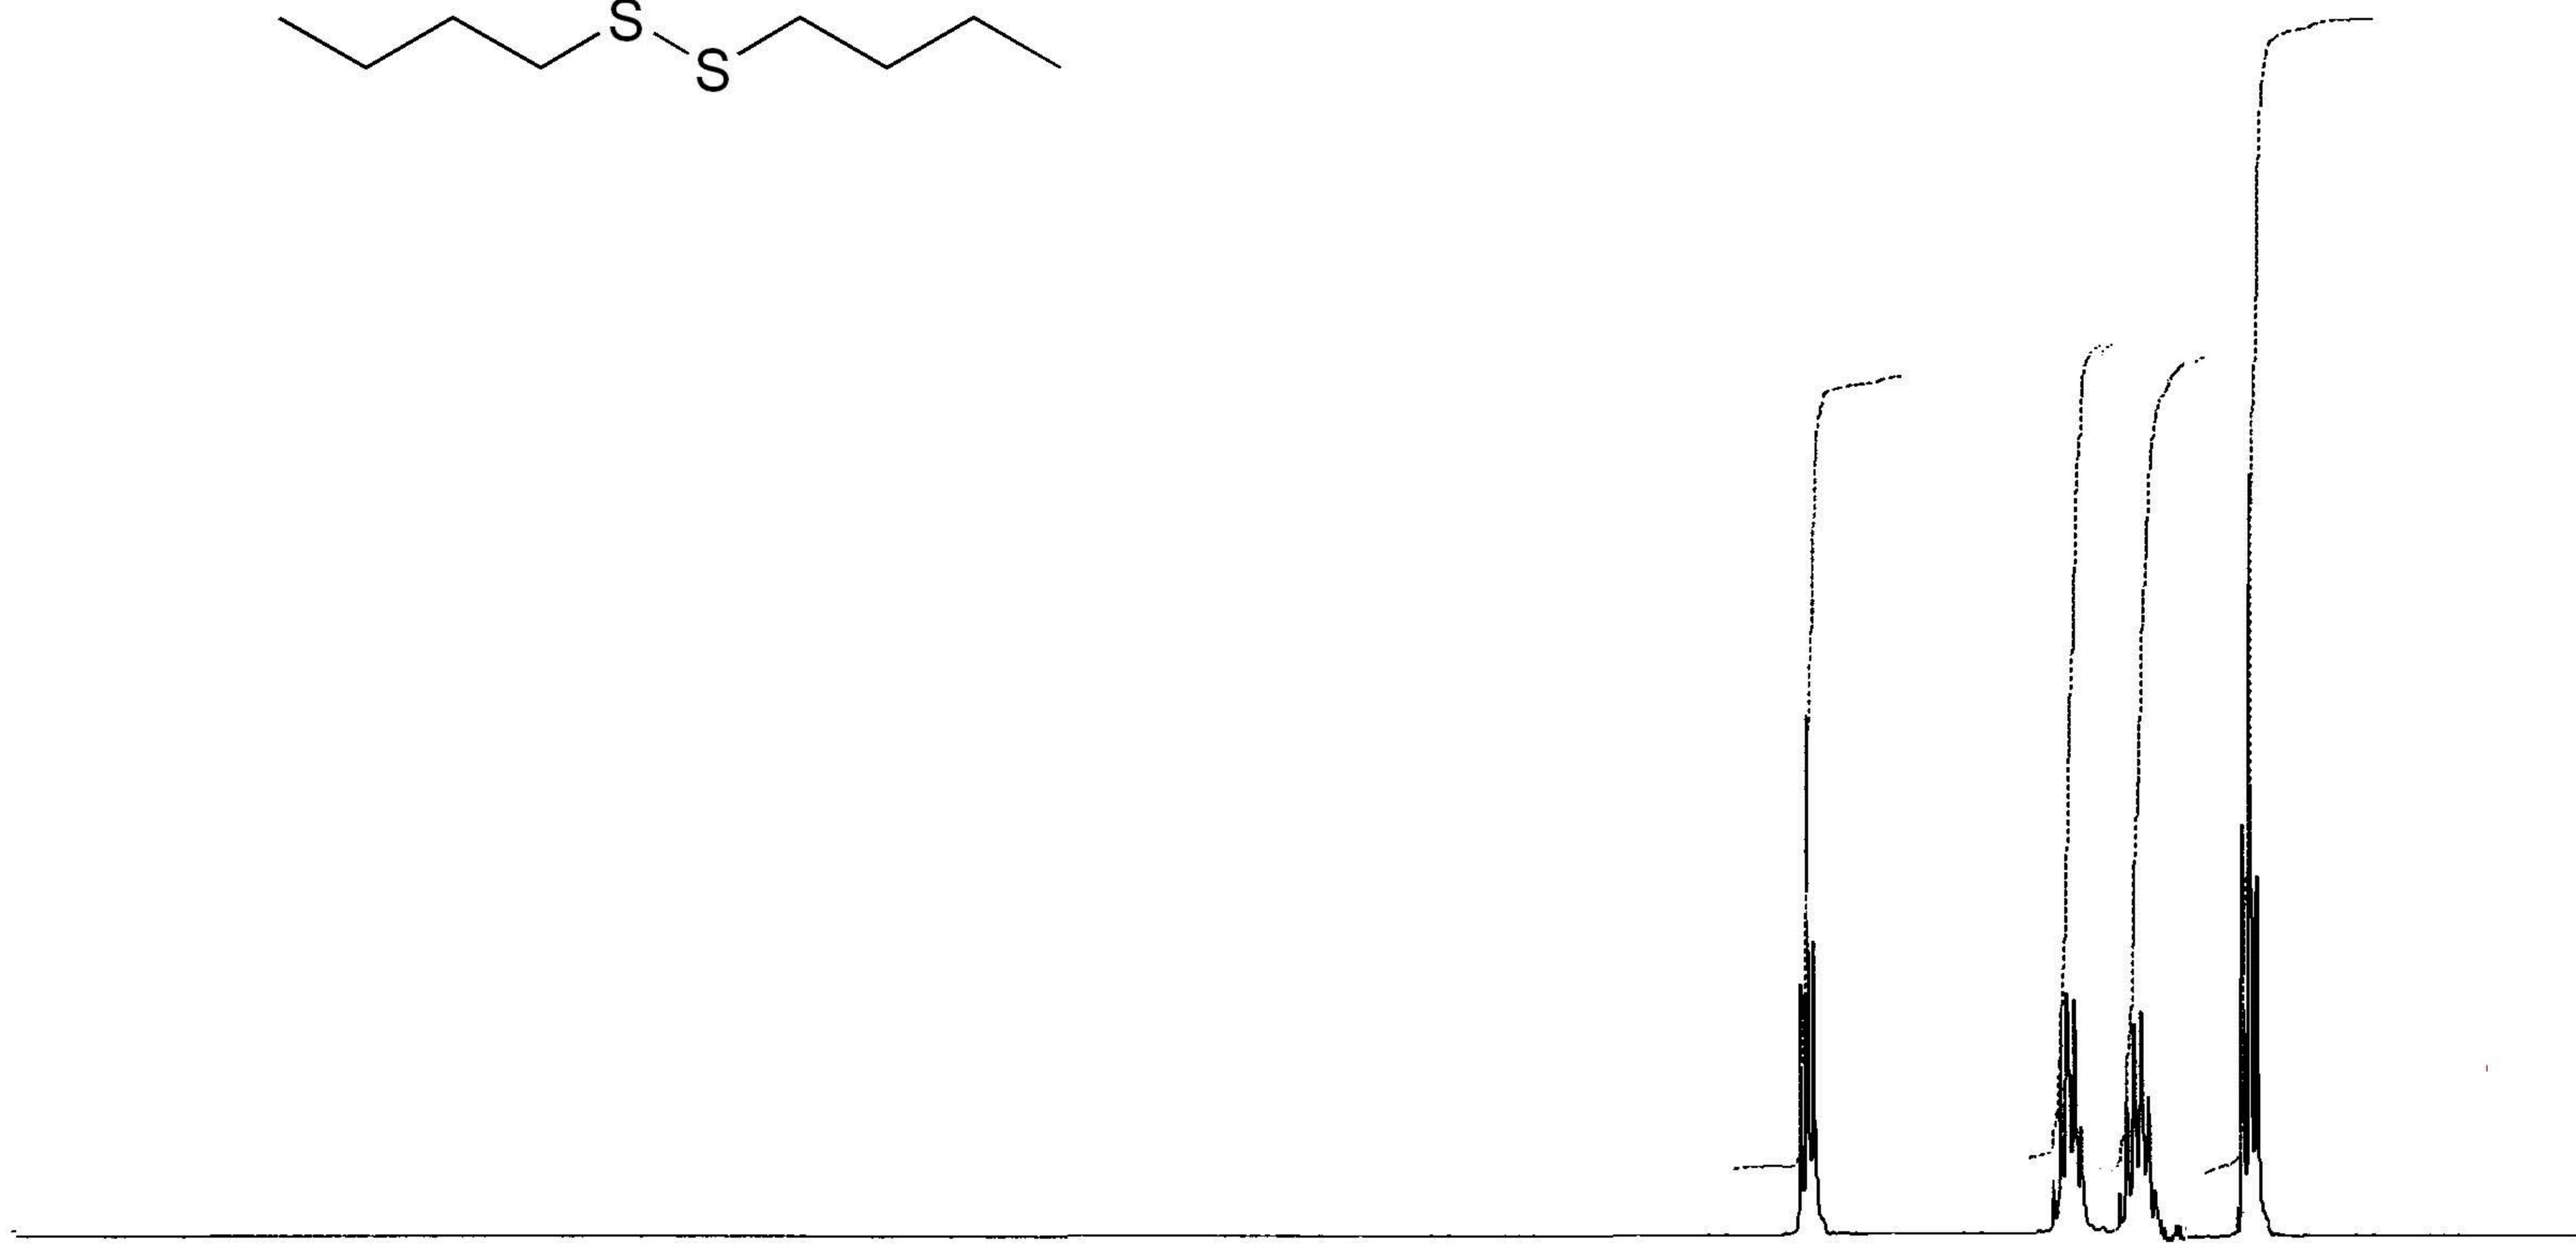

Integral

1.00  
1.11  
1.05  
1.41

ppm

9 8 7 6 5 4 3 2 1 0

ppm

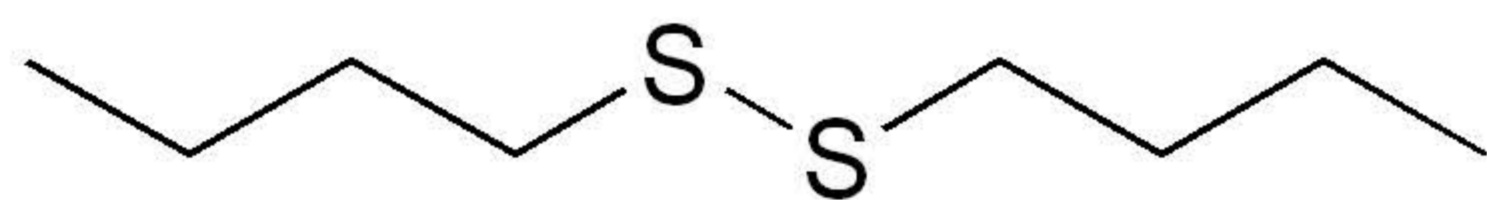

77.615  
77.105  
76.597

39.267  
31.666  
21.965  
13.988

ppm 175 150 125 100 75 50 25 0

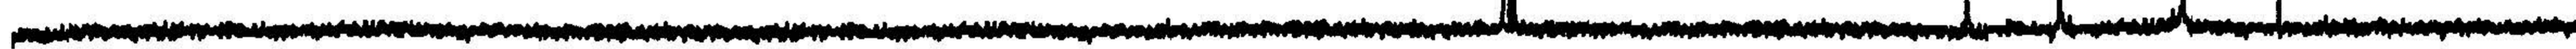

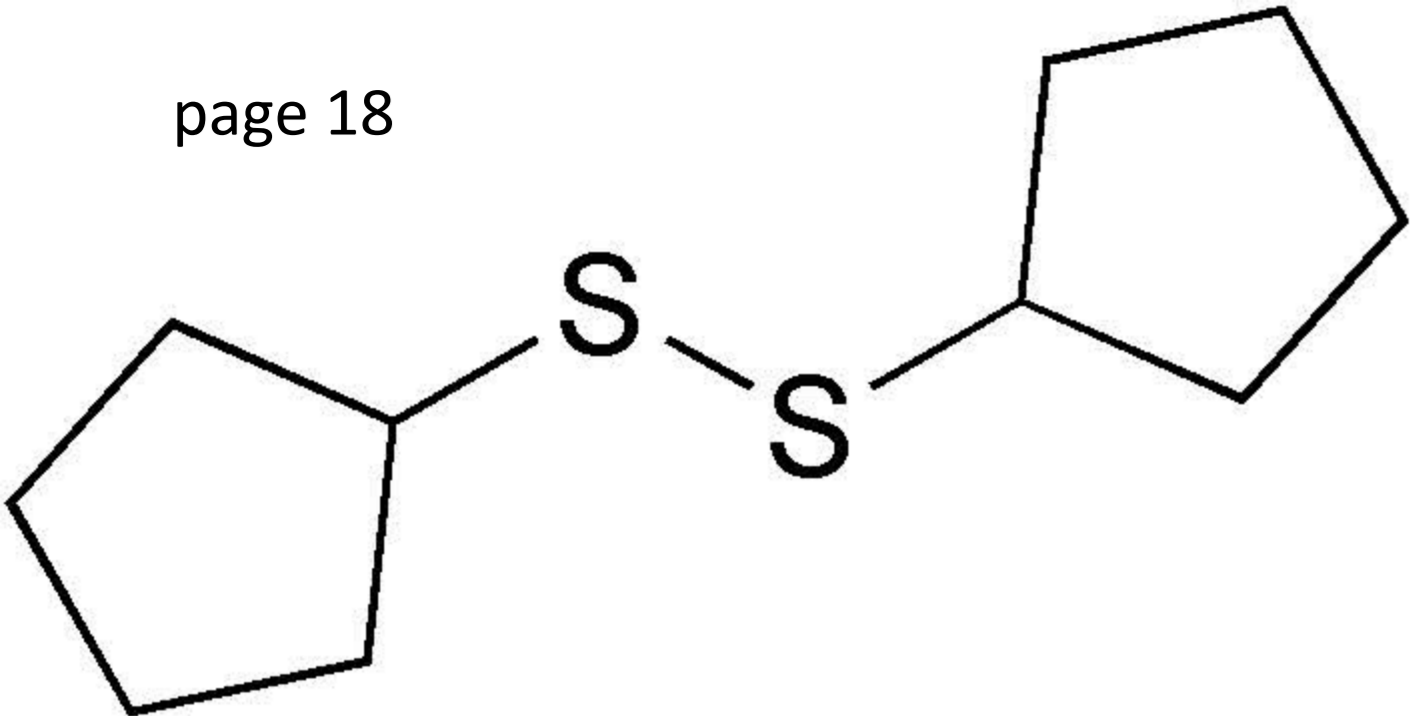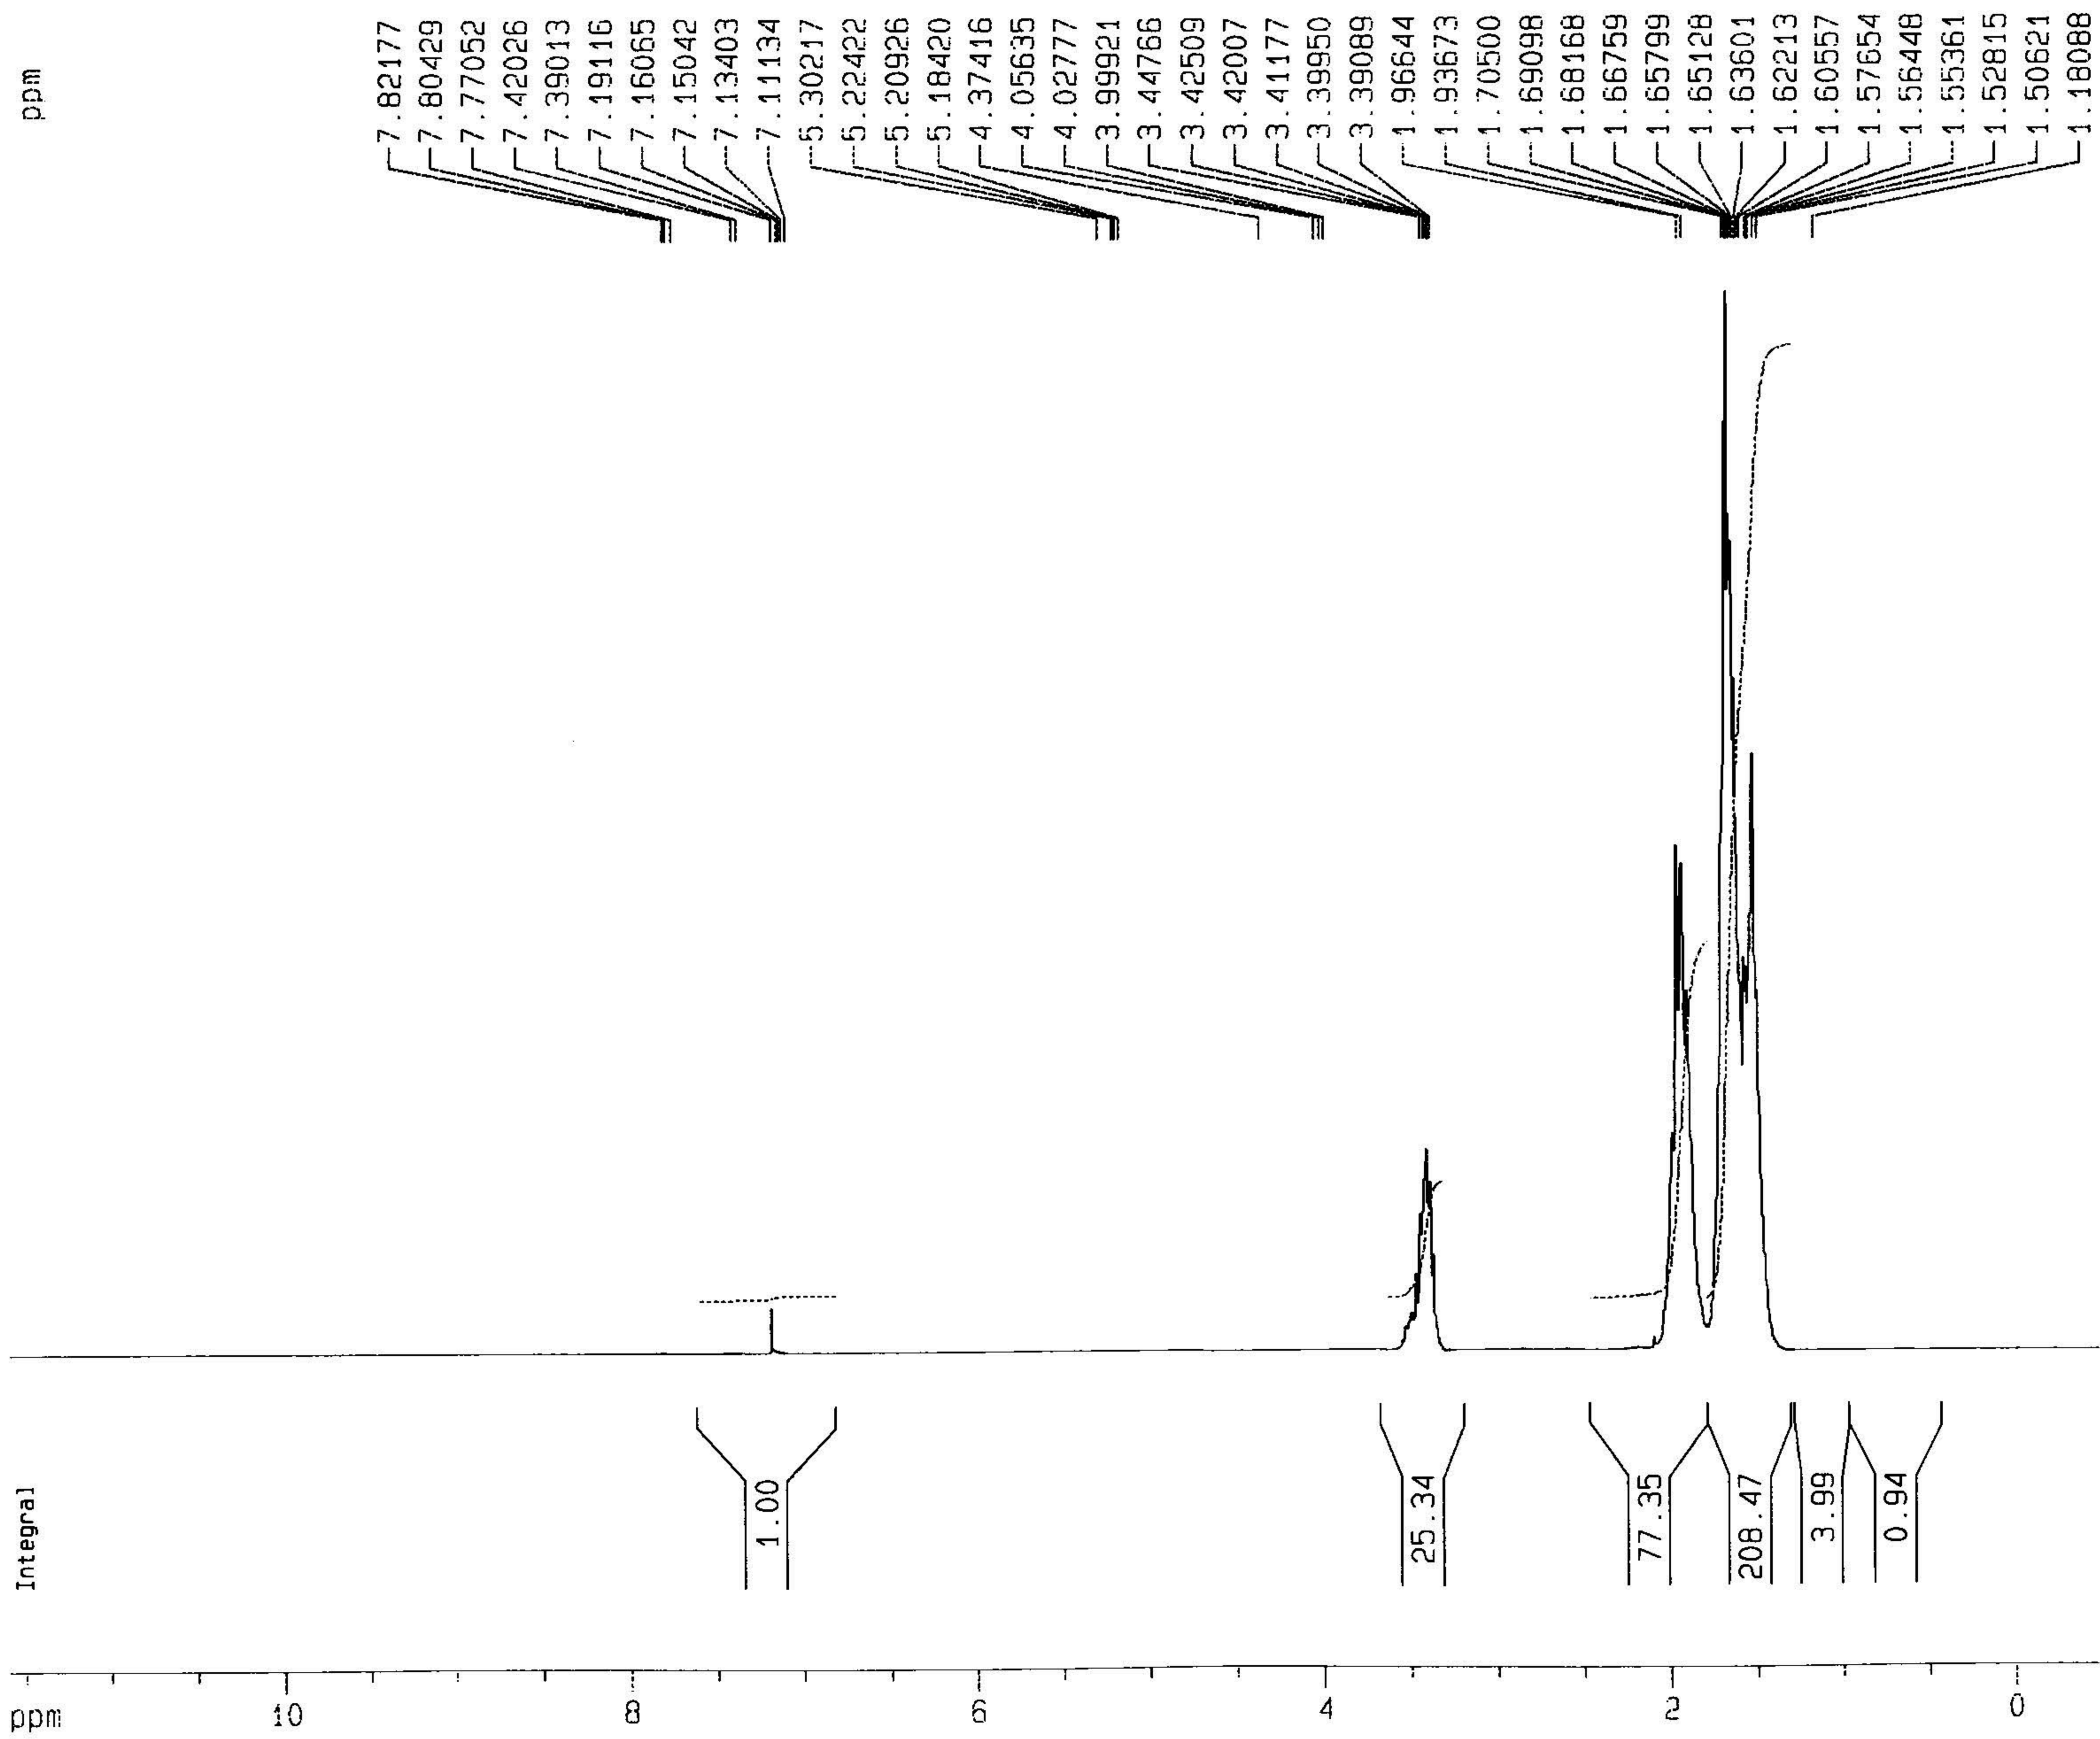

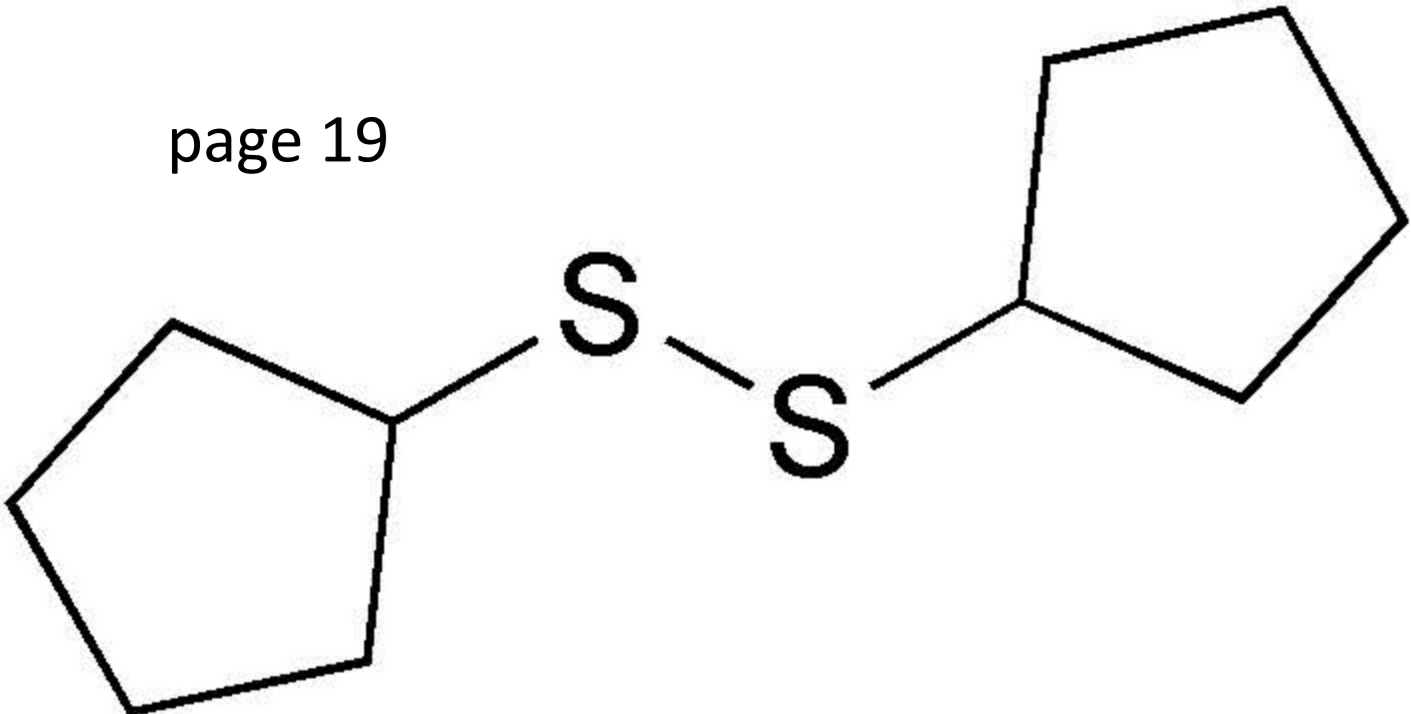

ppm

77.551  
77.043  
76.534

50.675

32.945

24.744

ppm

150

100

50

0

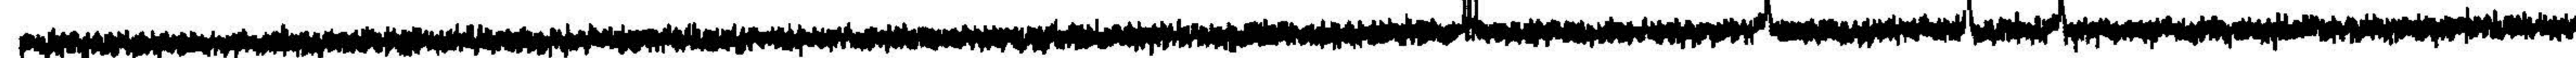

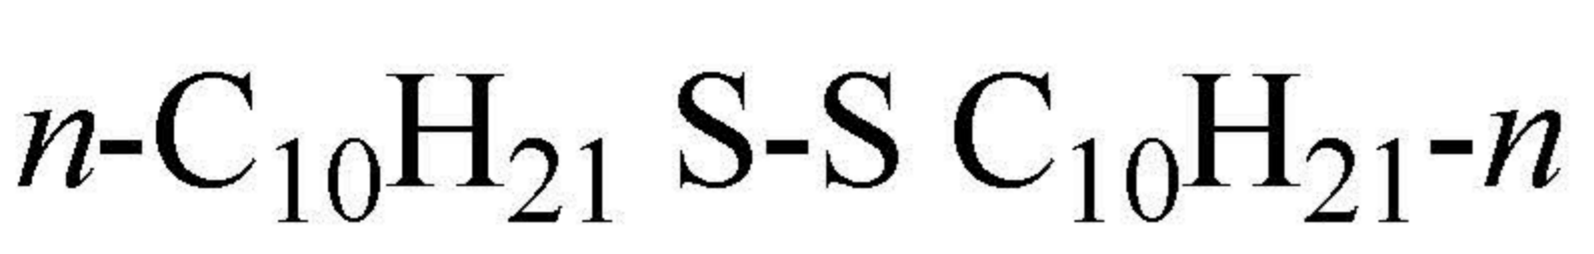

page 20

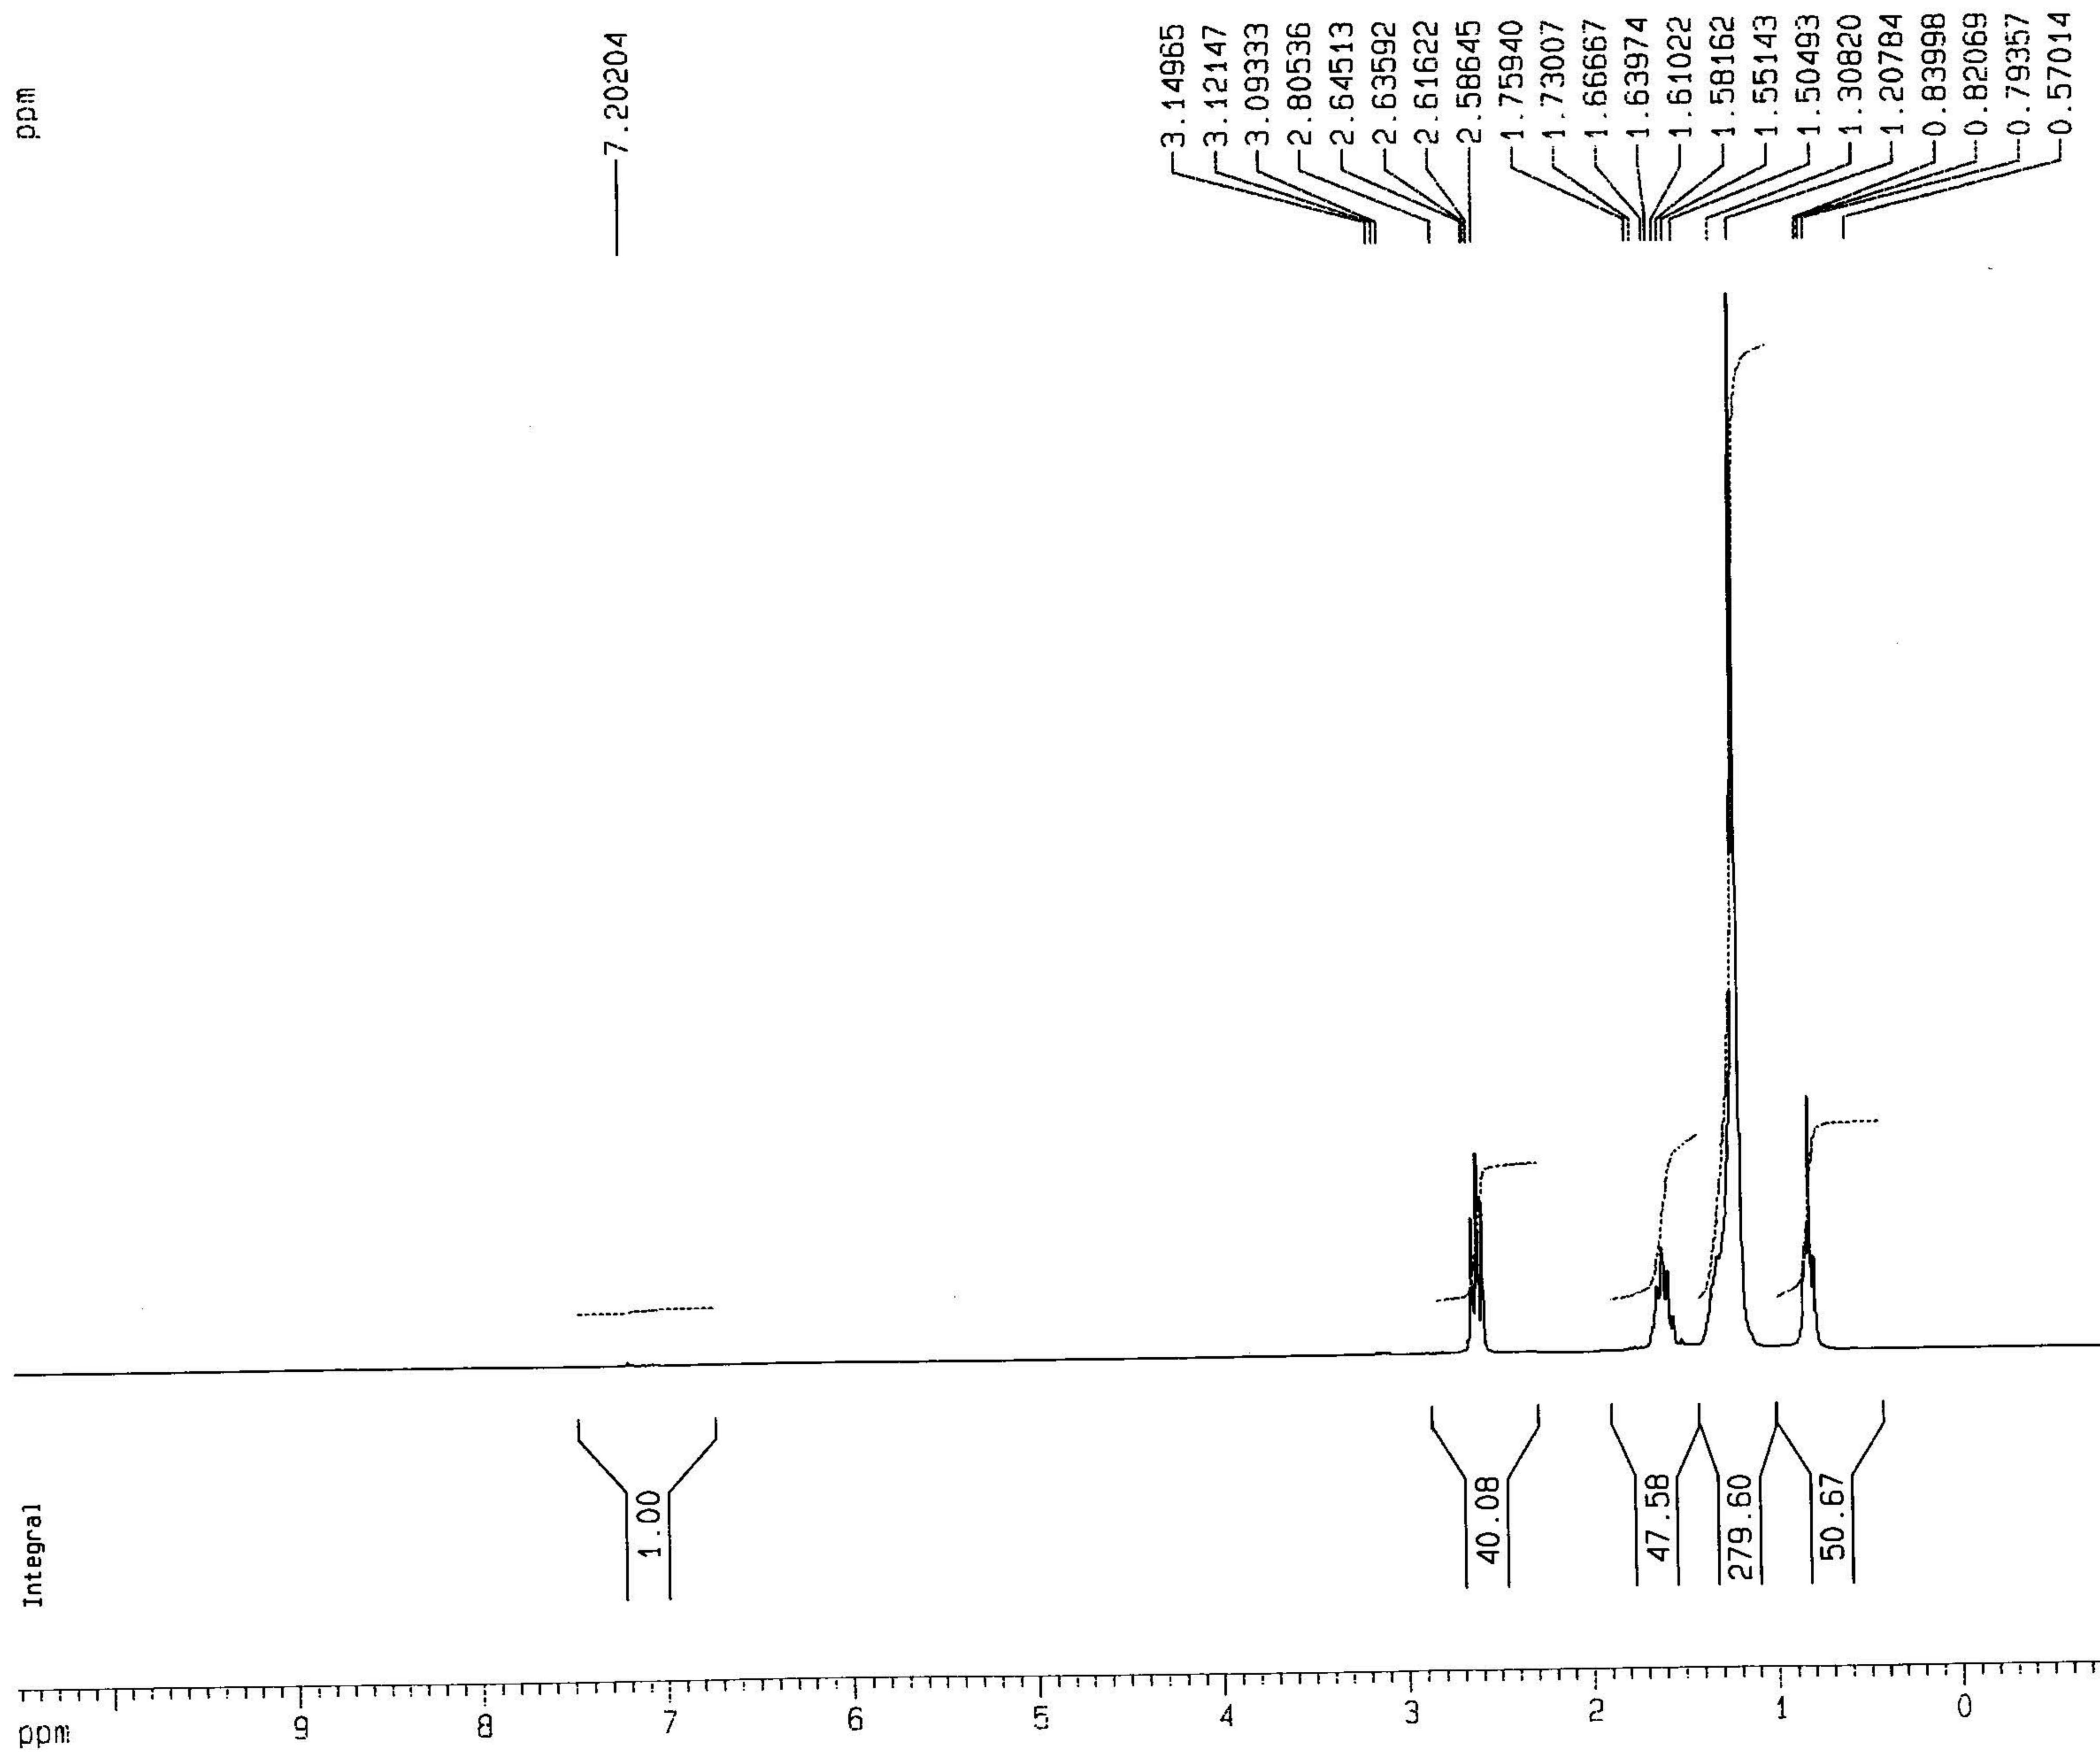

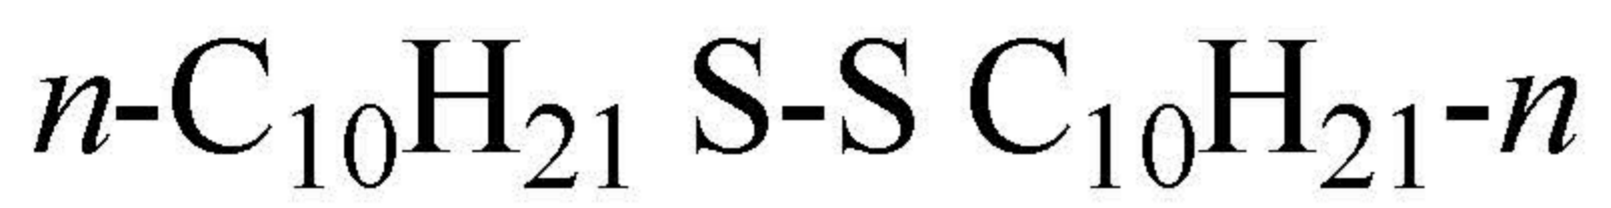

page 21

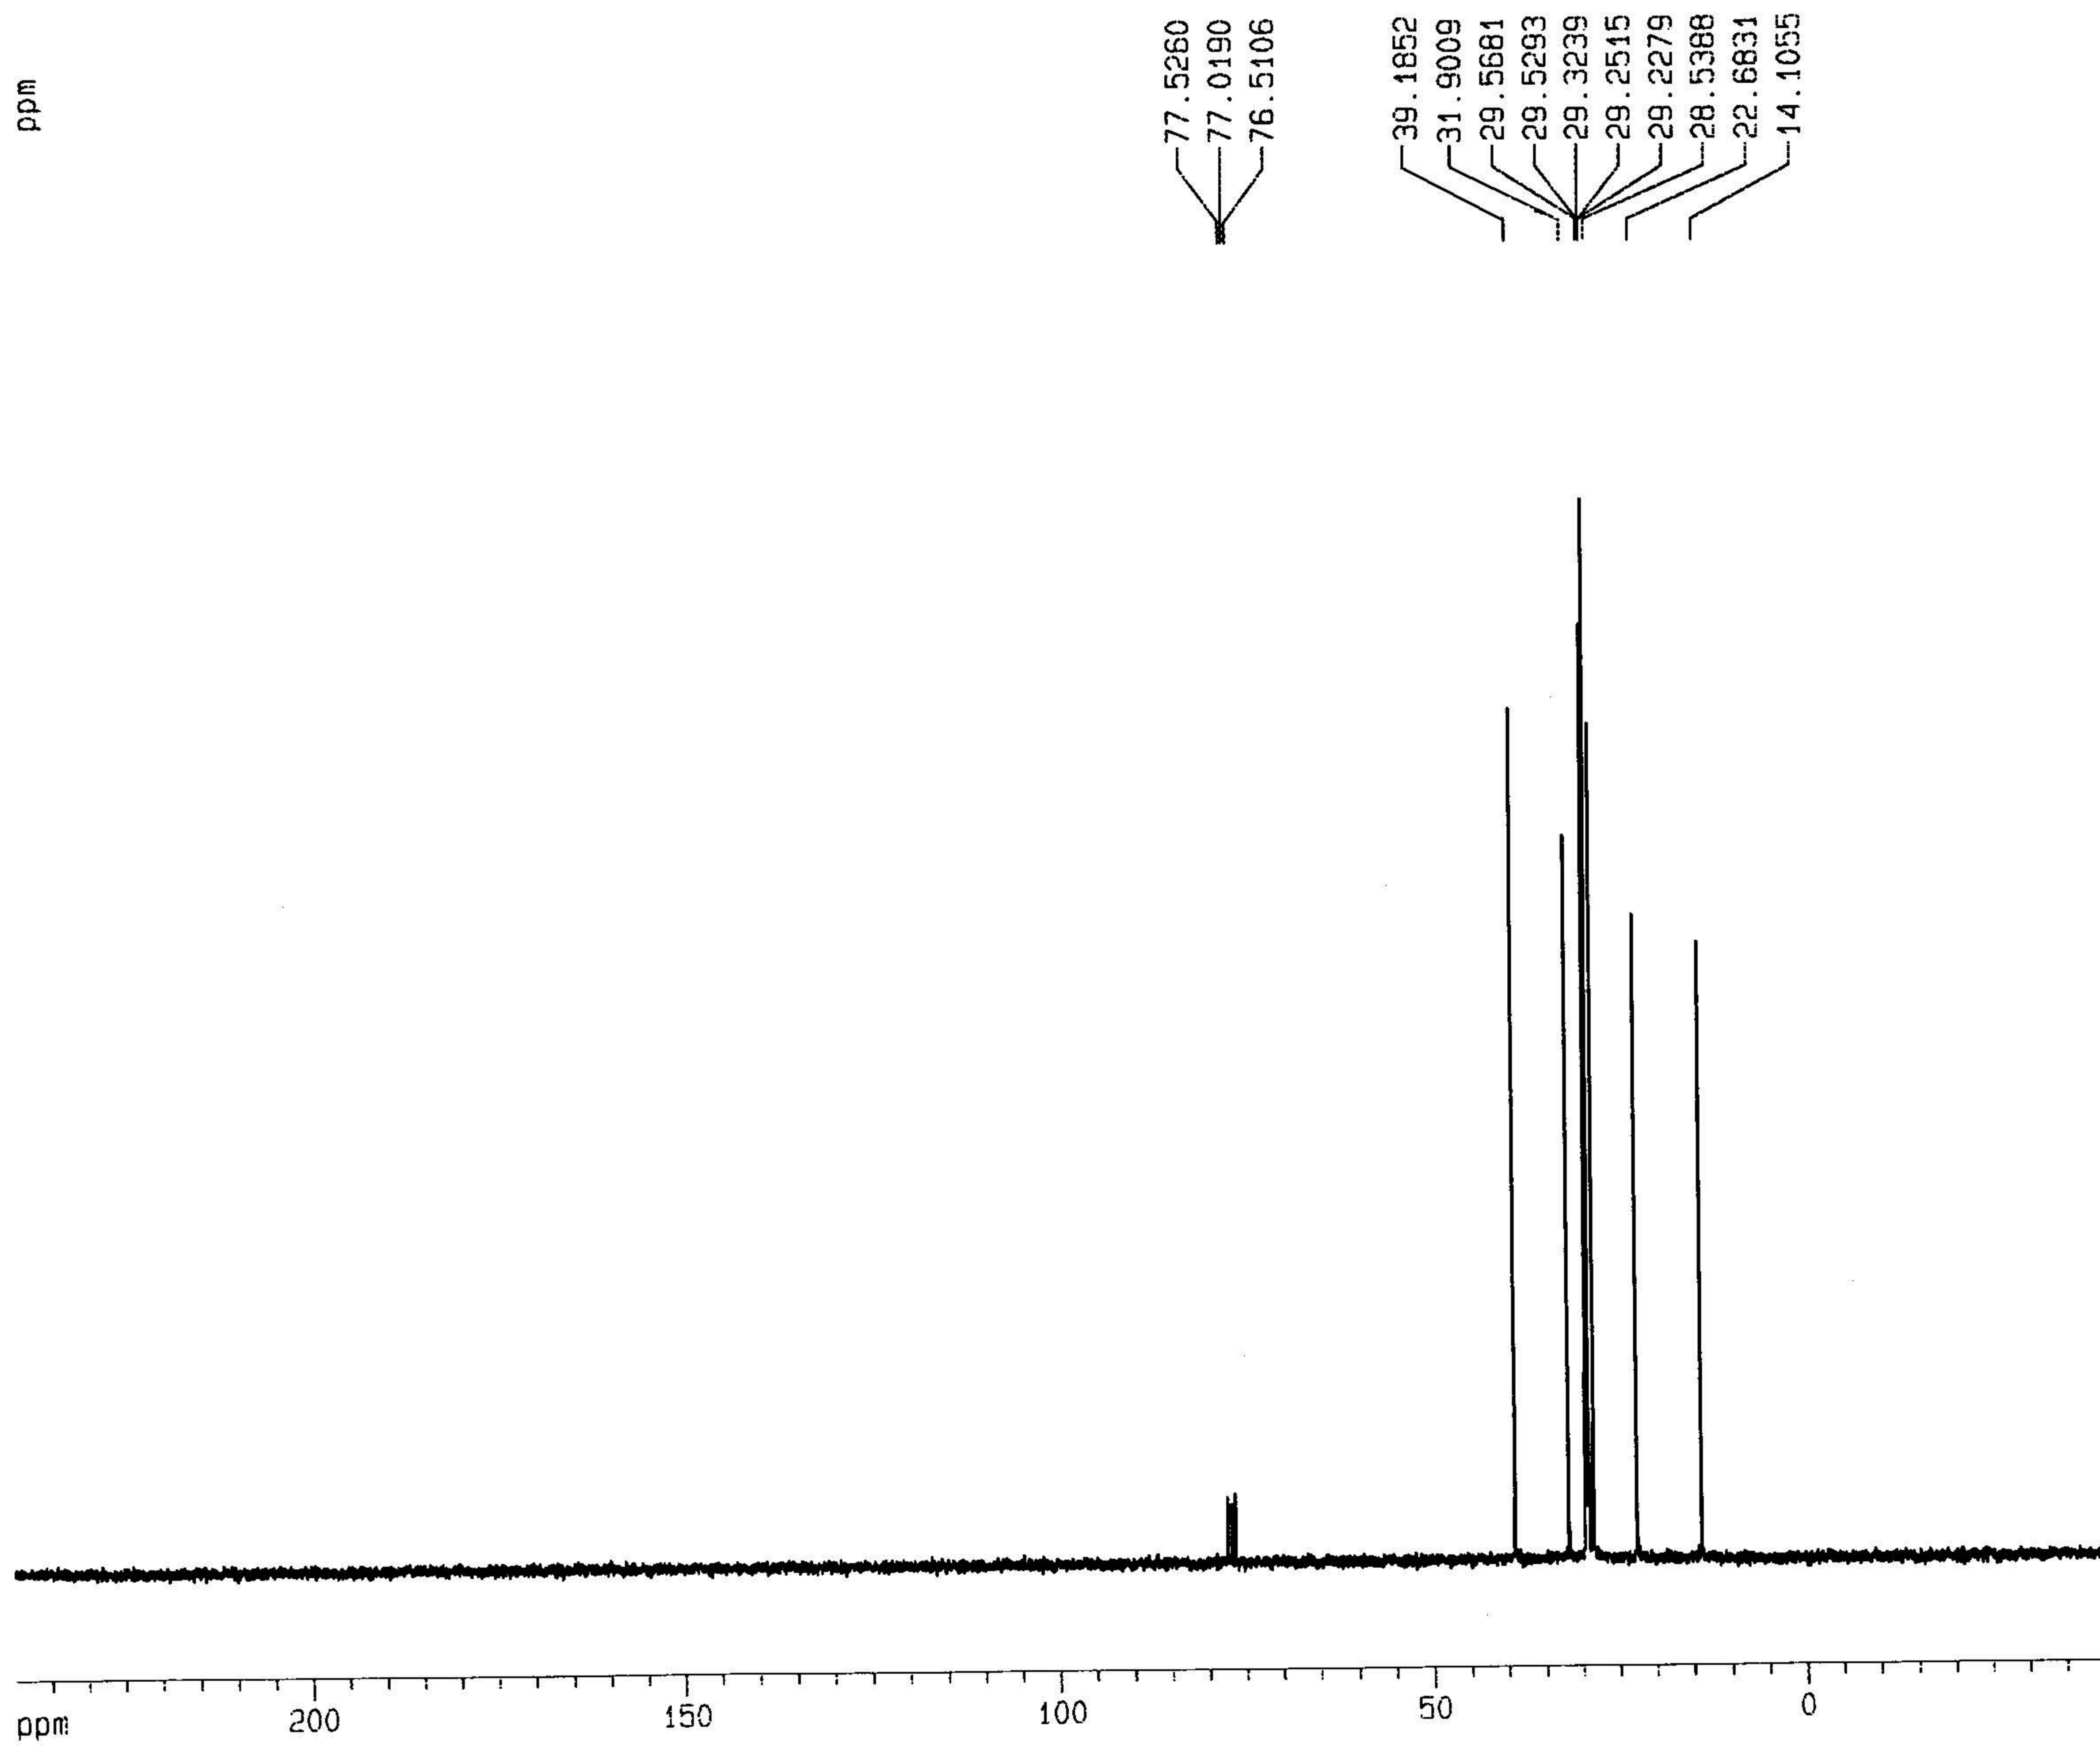

ppm

page 22

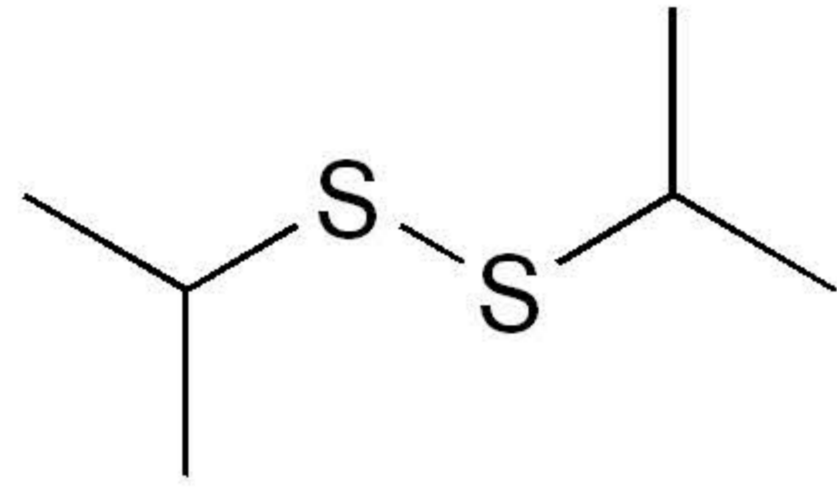

3.0481  
3.0214  
2.9935  
2.9670  
2.9329  
2.9120  
2.8852

1.5548  
1.5477  
1.5248  
1.4948  
1.2967  
1.2692  
1.1976  
0.8376  
0.8300  
0.8127  
0.7854

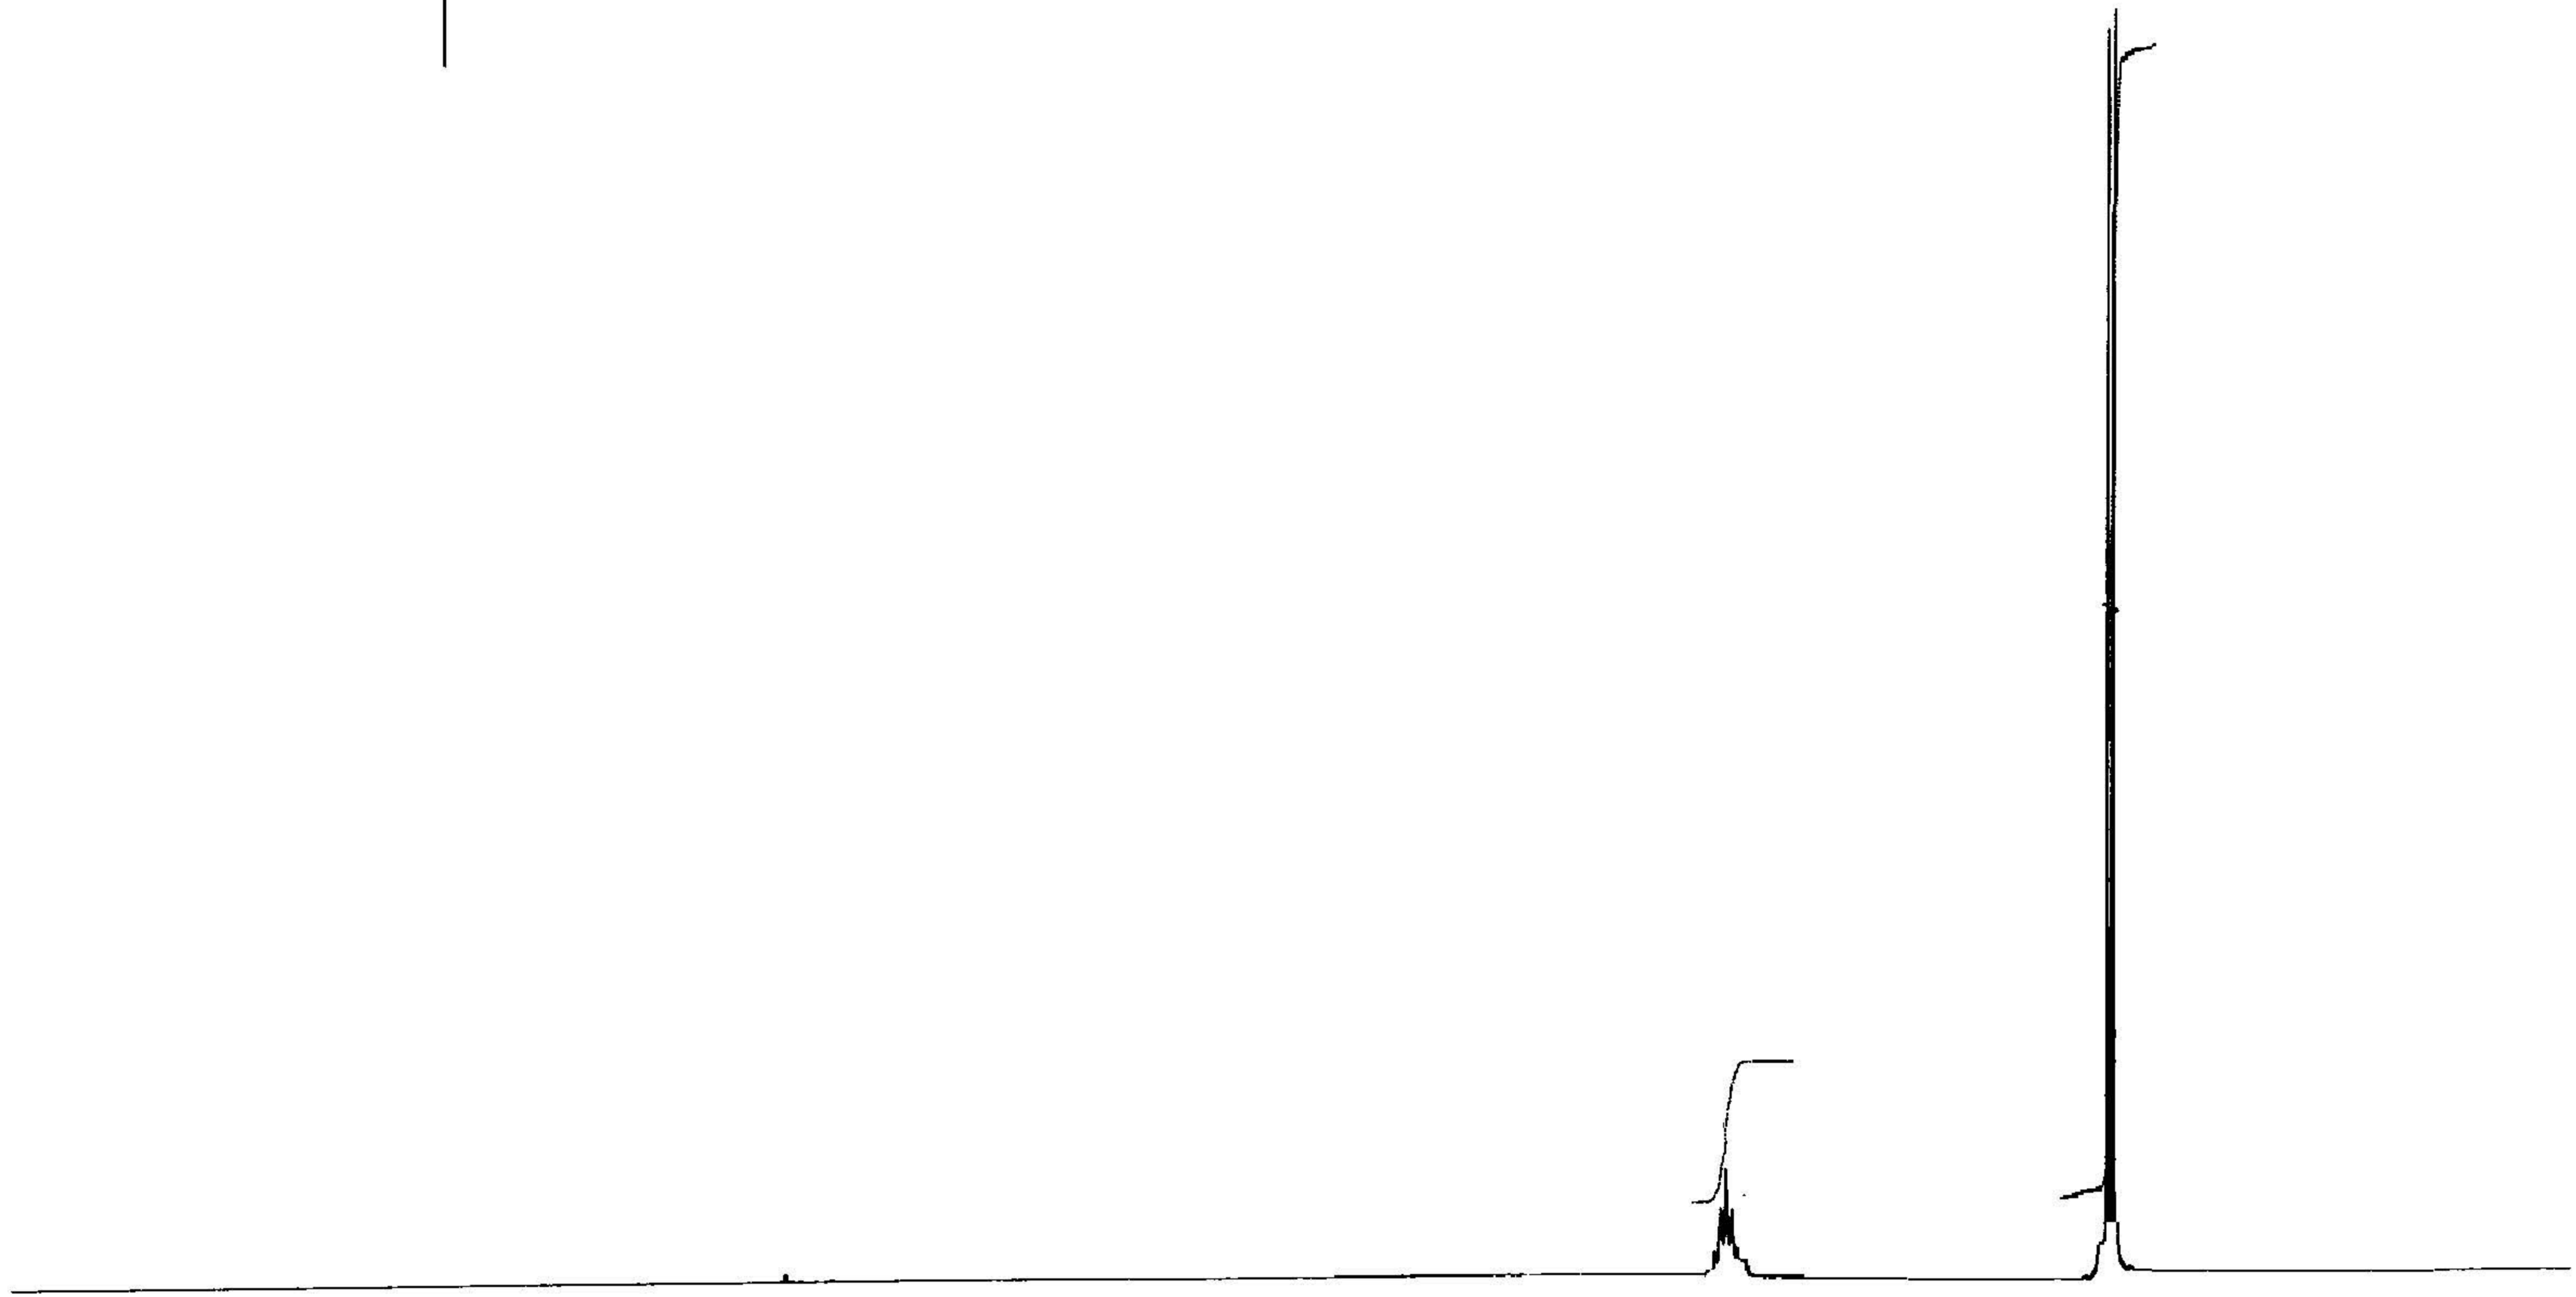

Integral

ppm

8

6

4

2

0

1.00

6.68

ppm

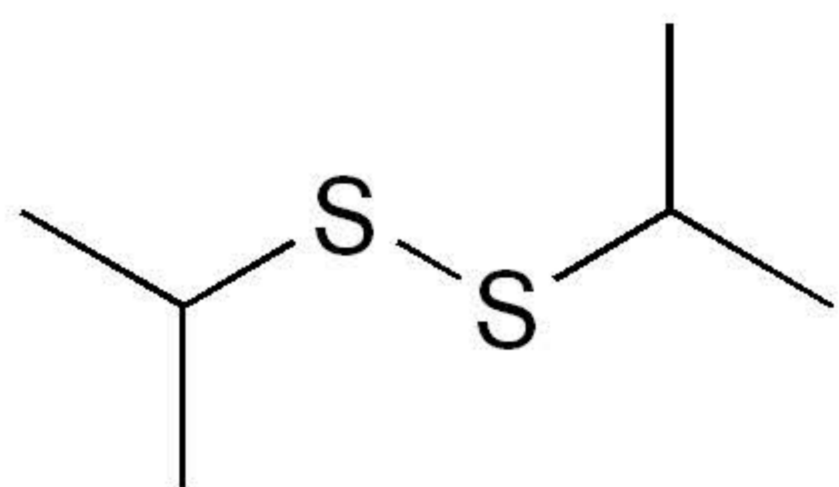

77.777  
77.264  
76.756

41.421

22.586

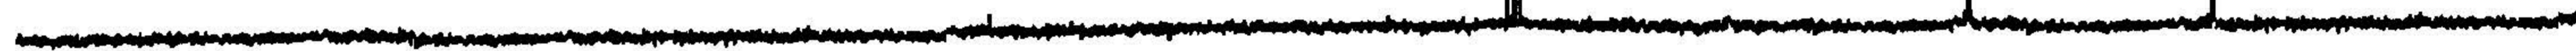

ppm

150

100

50

0



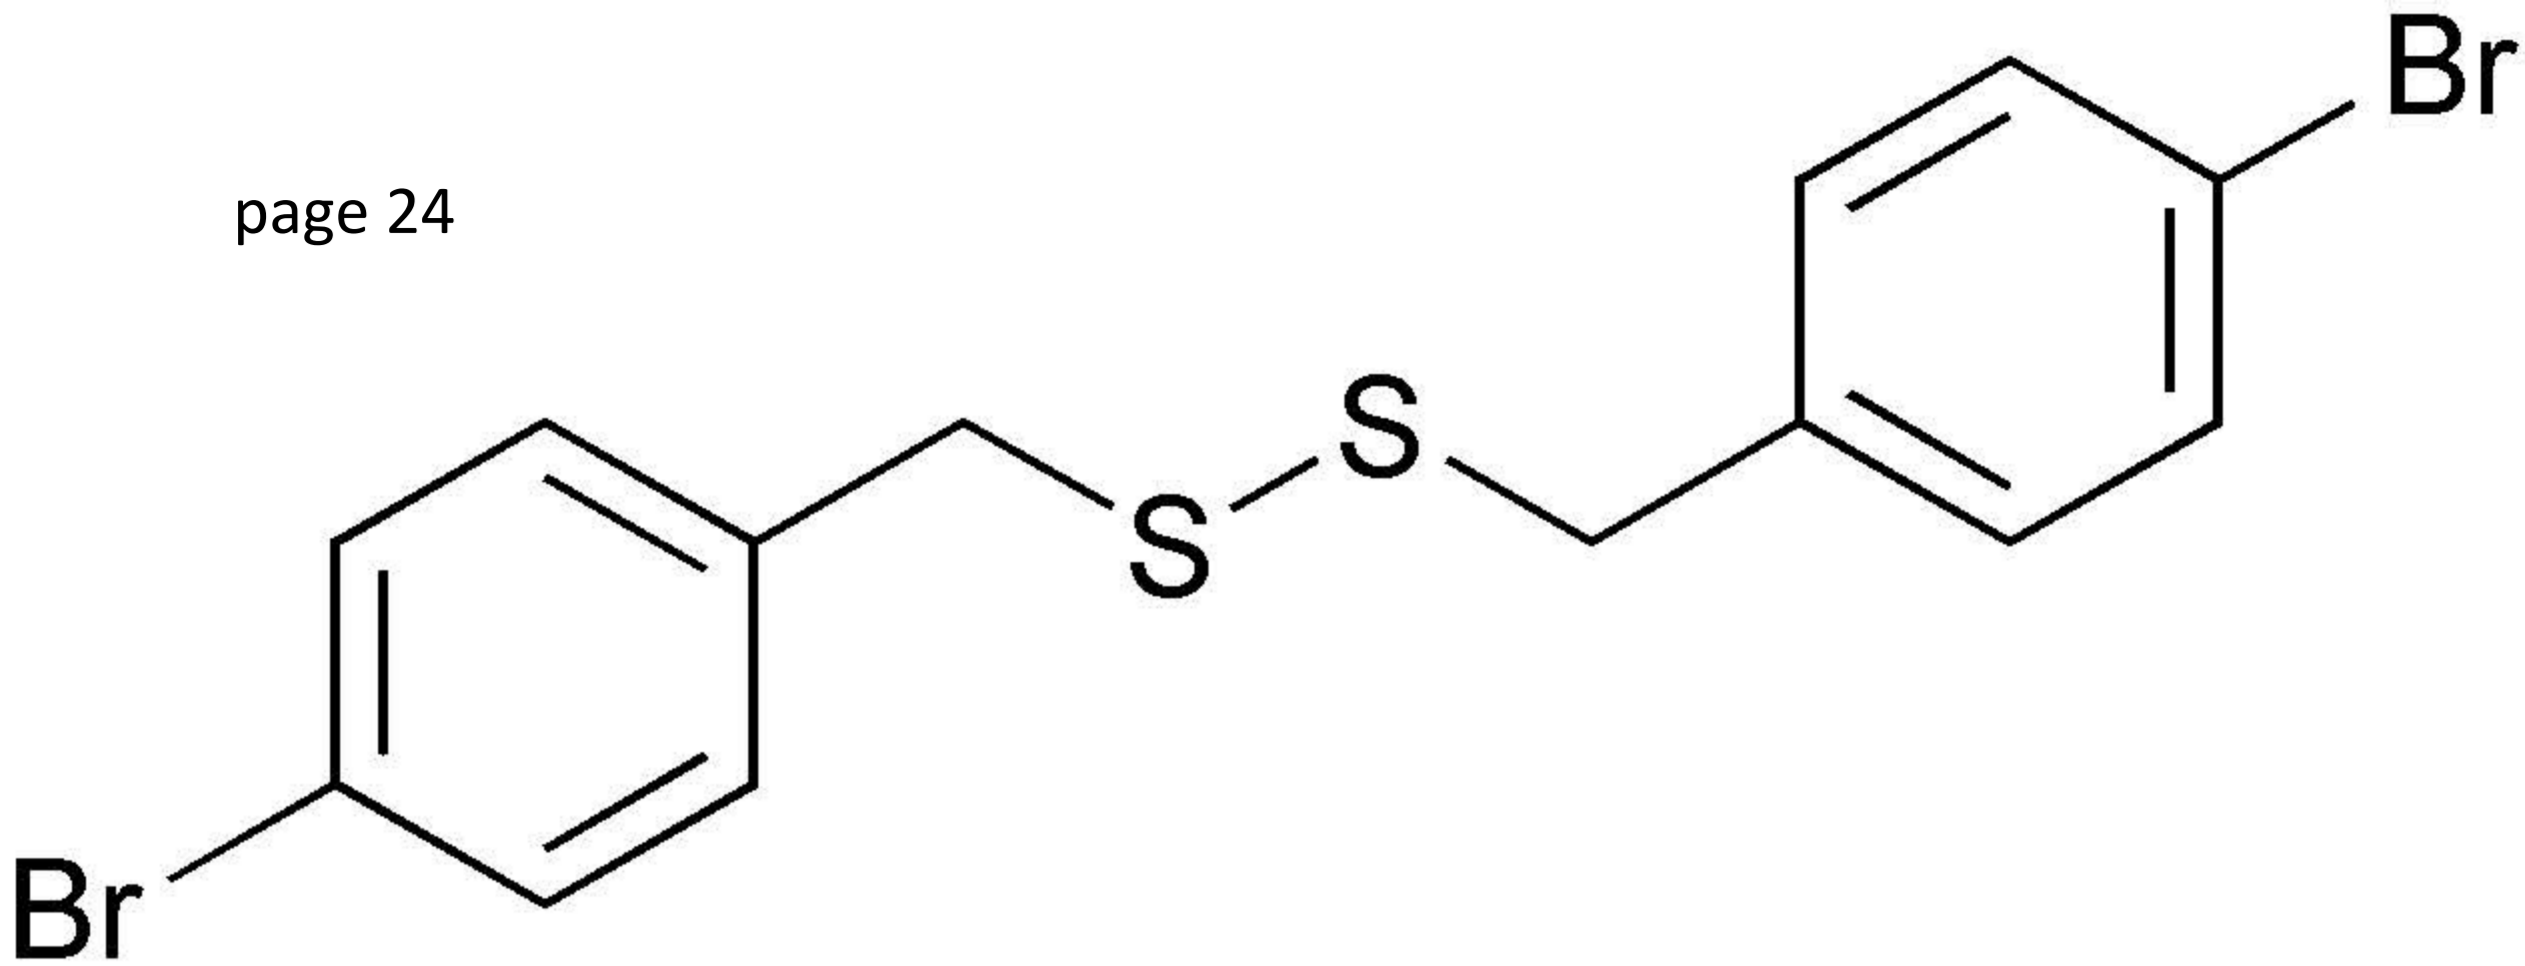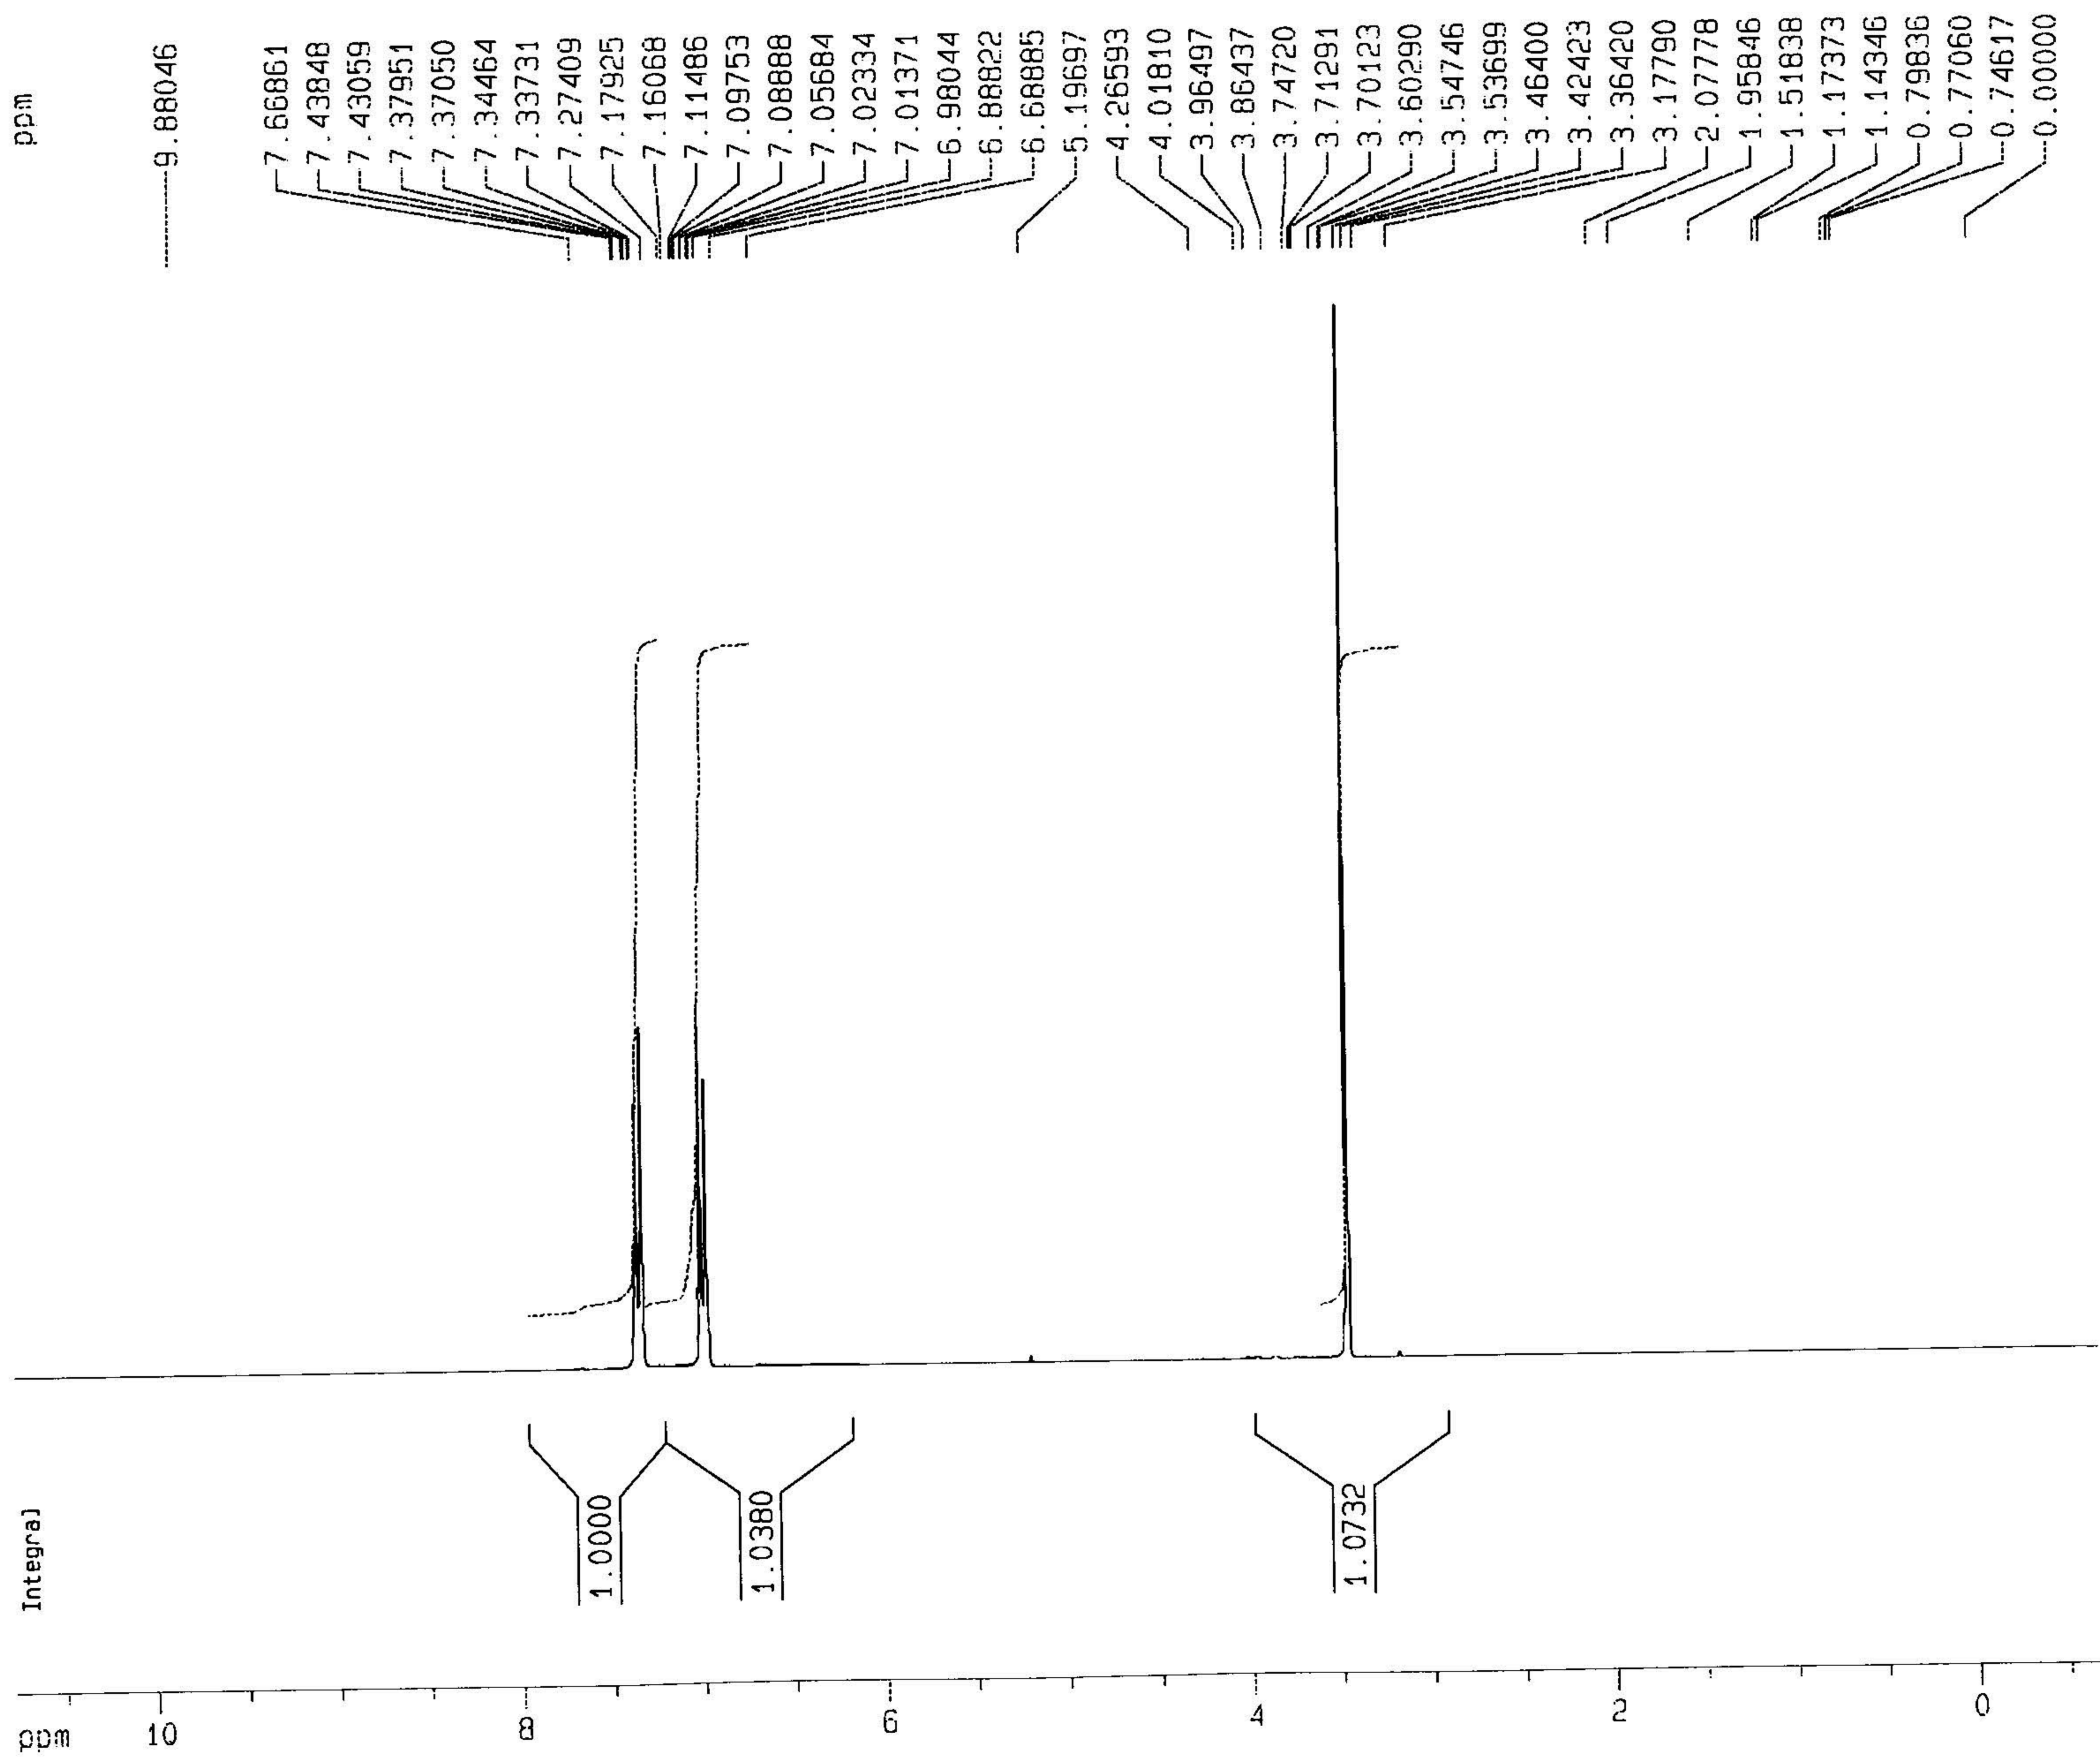

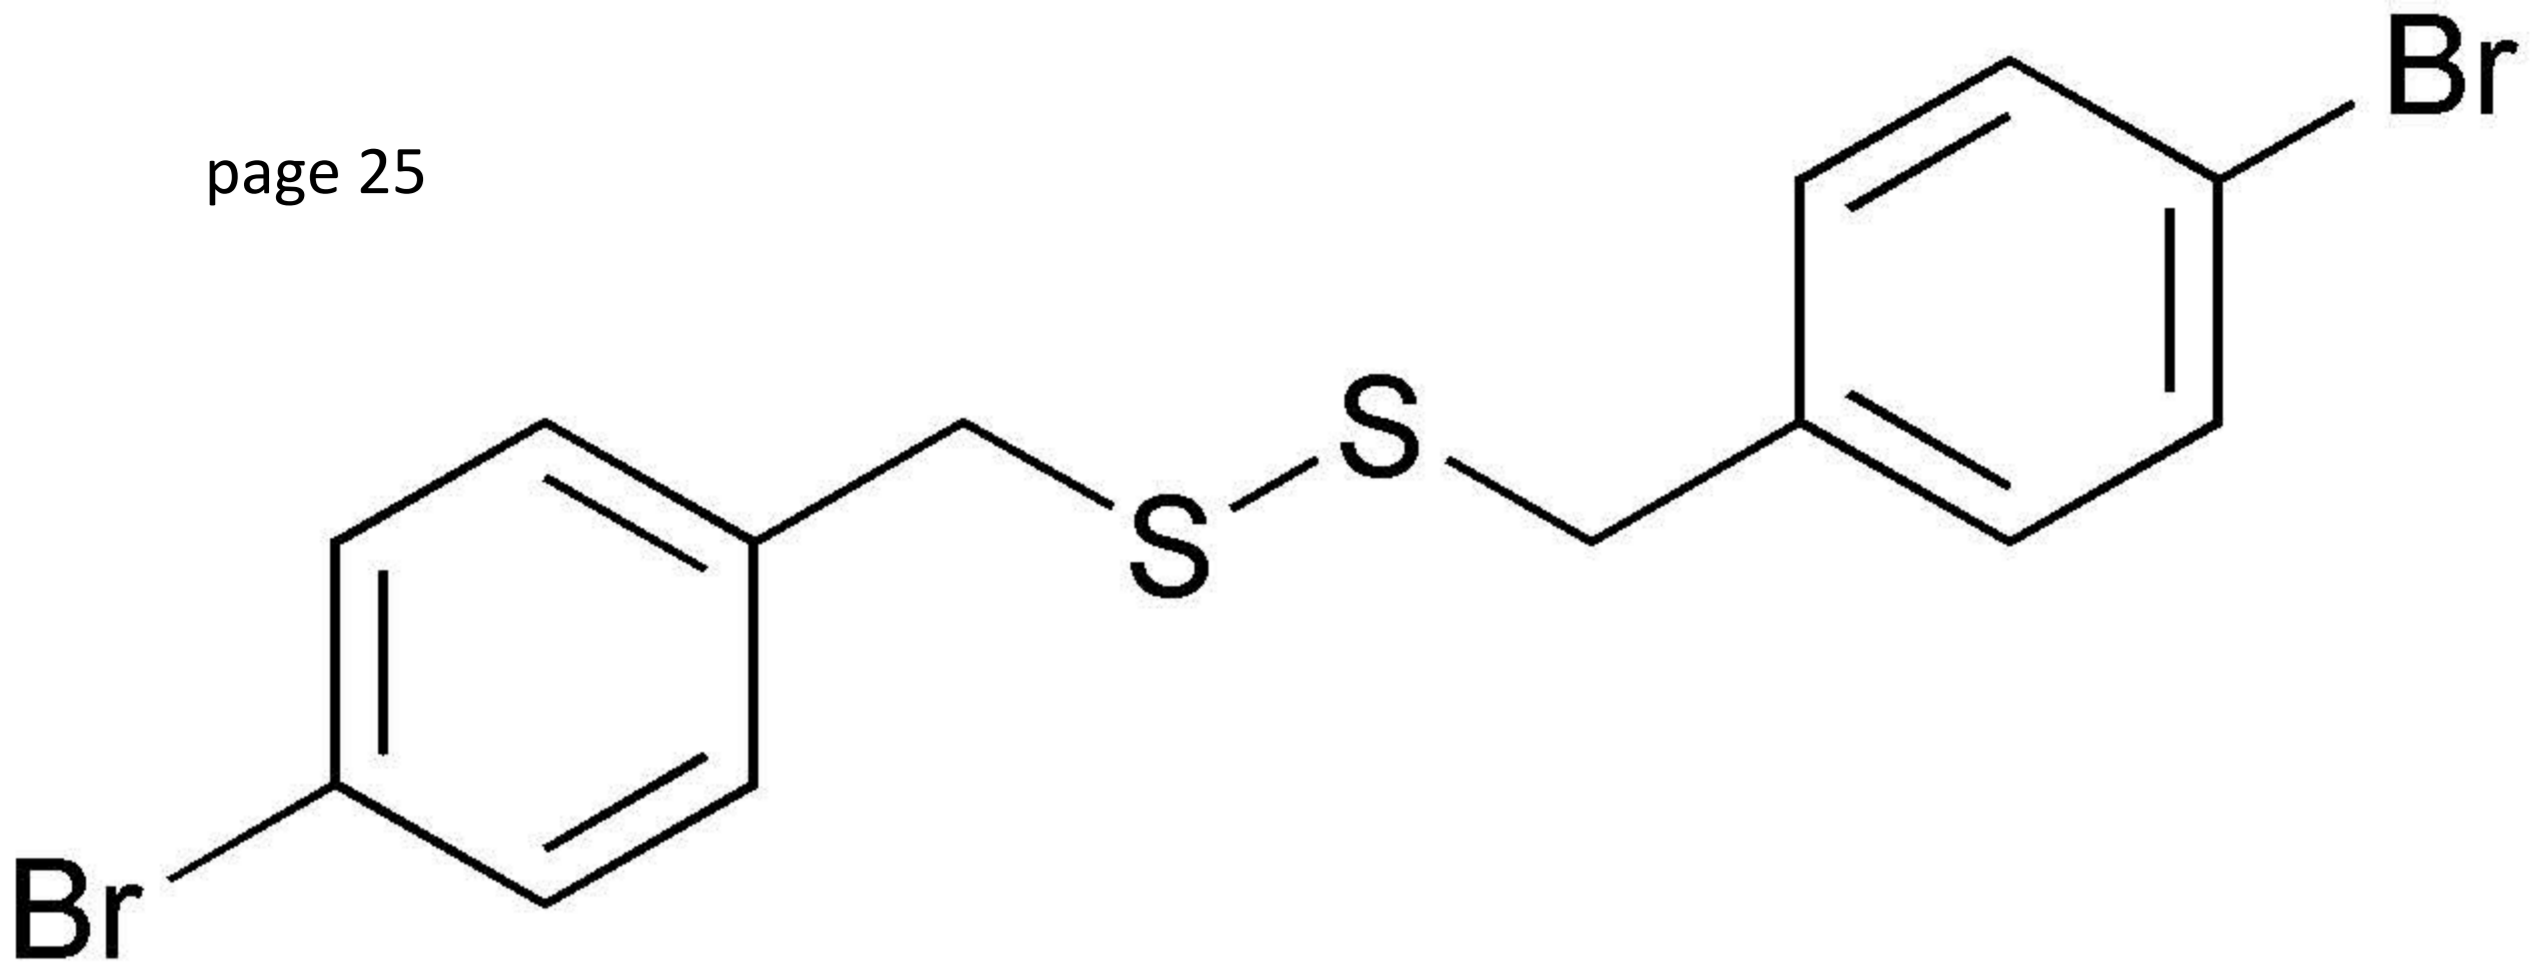

ppm

136.323

131.648

131.235

121.503

77.600

77.087

76.578

42.524

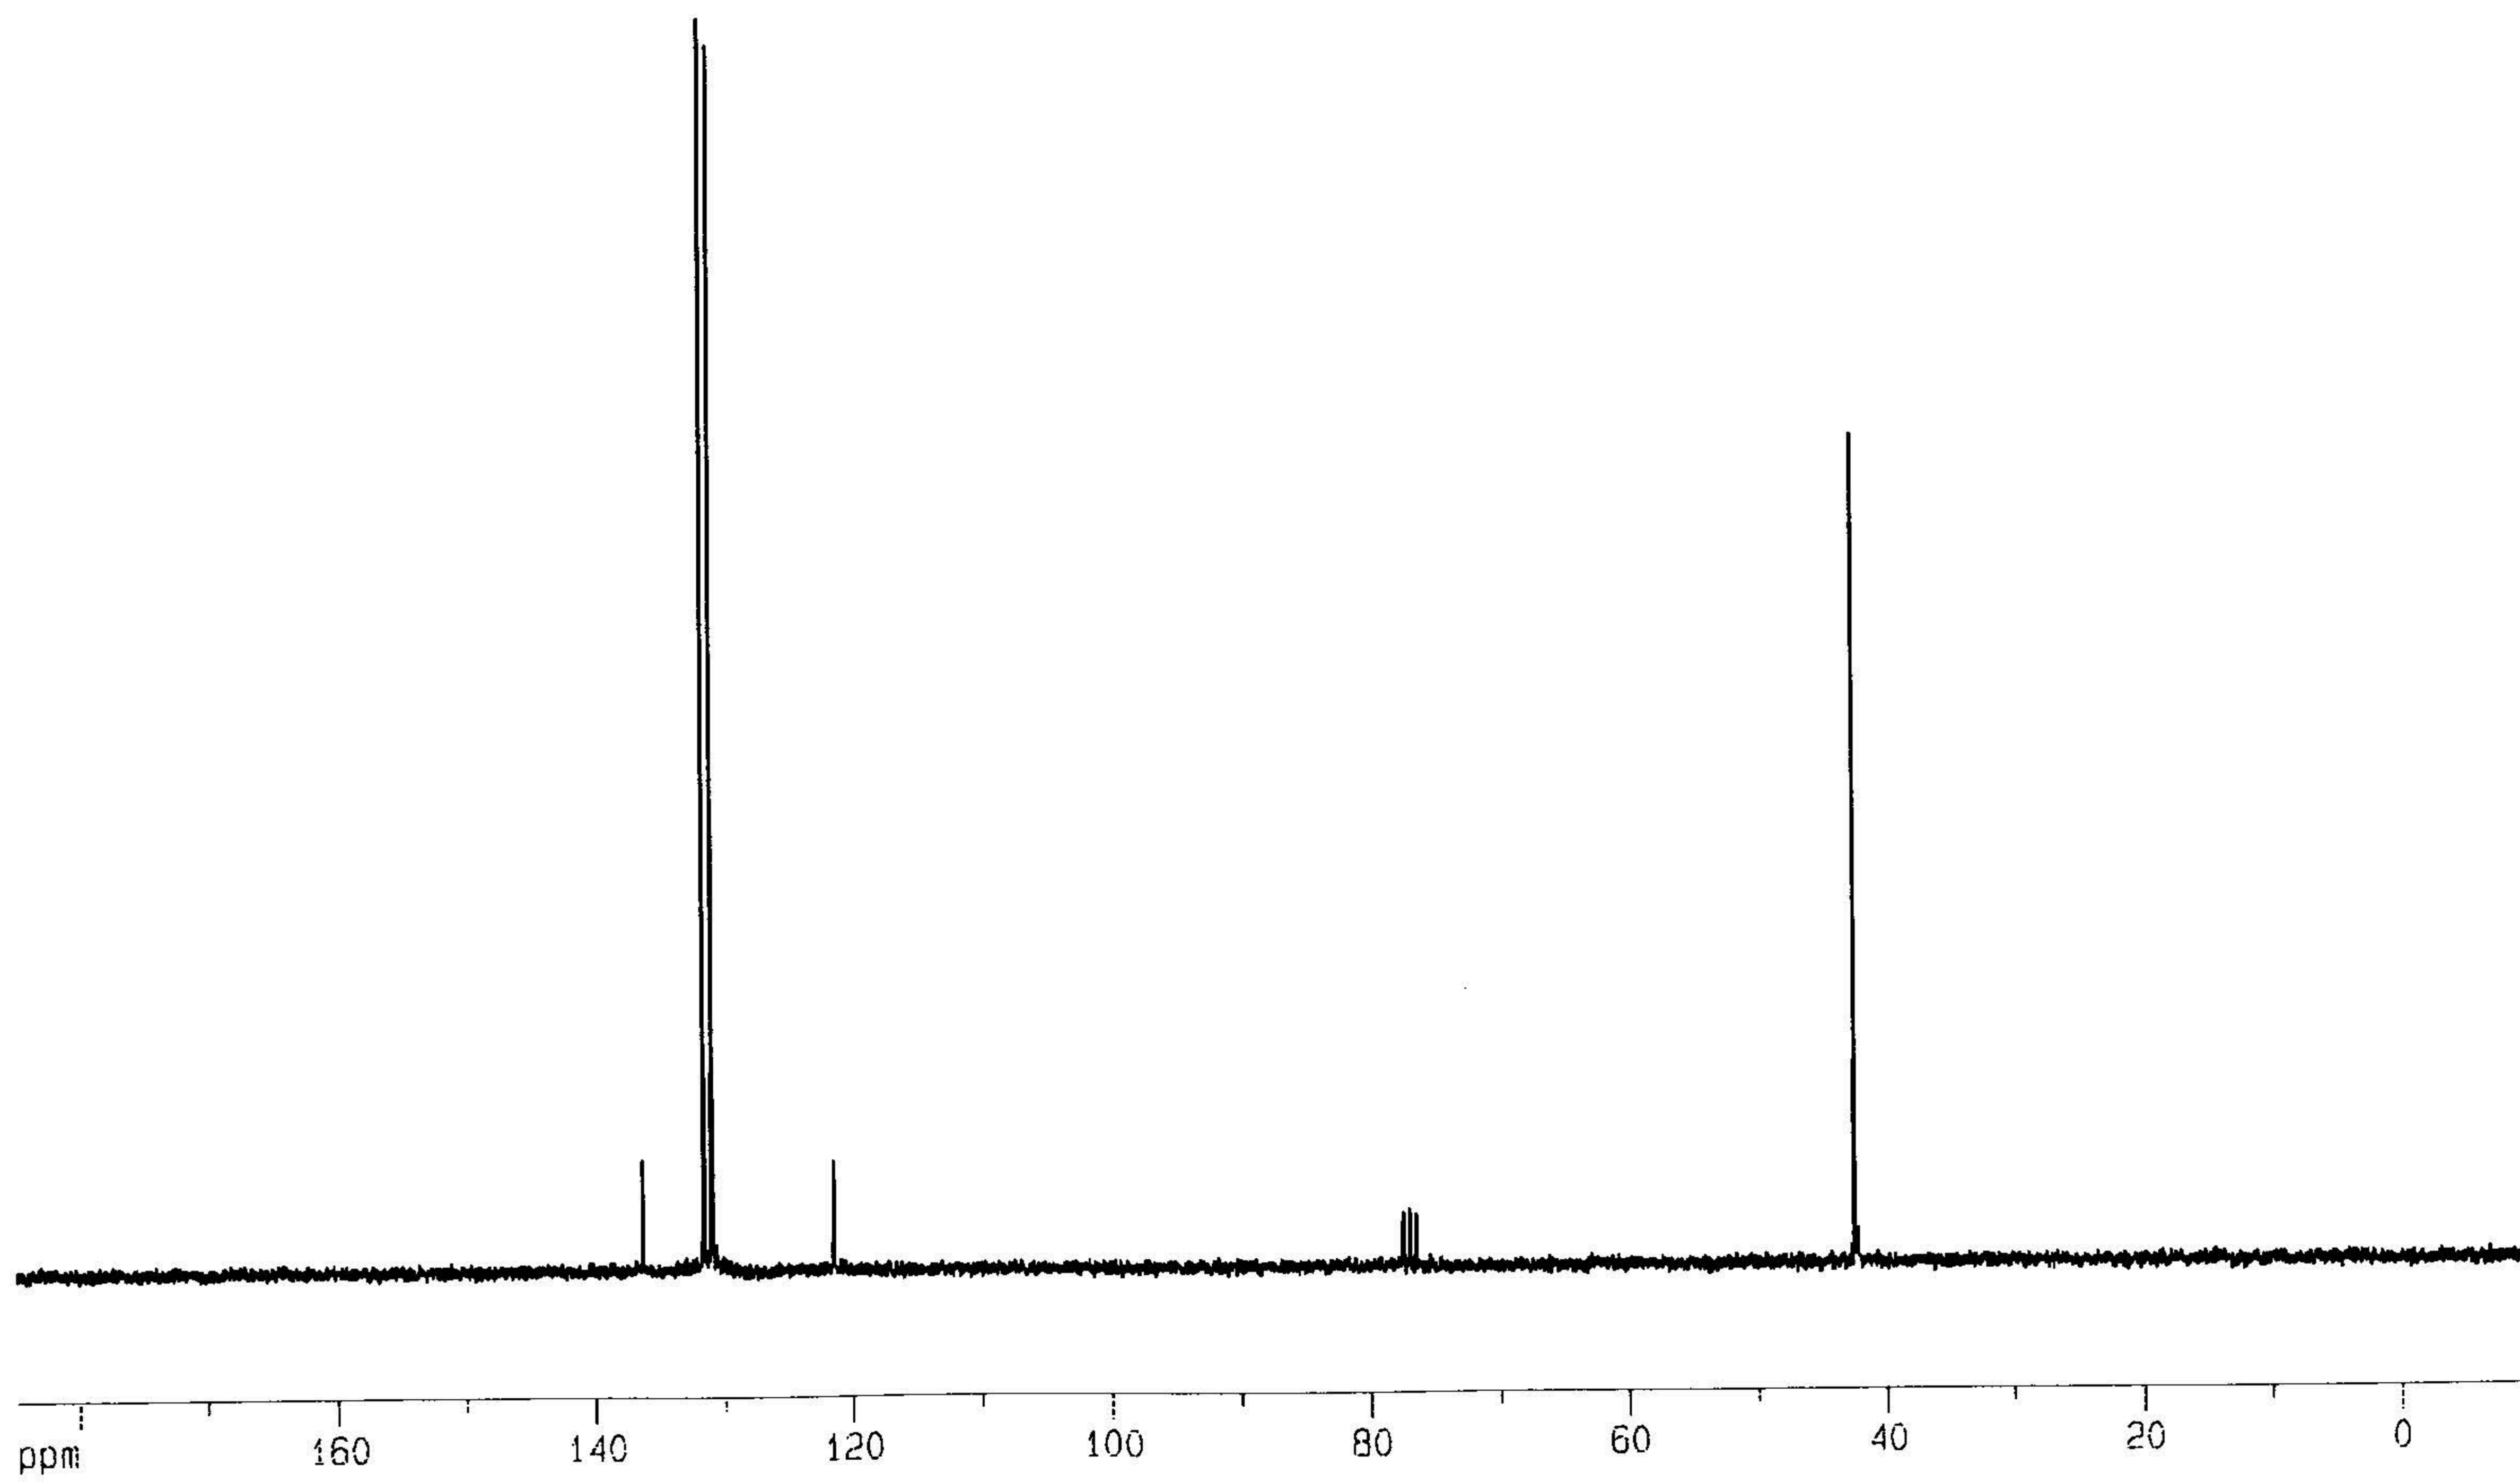

ppm

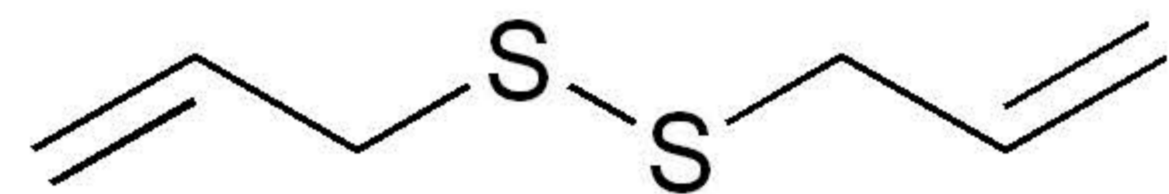

133.371

118.216

77.640

77.130

76.619

42.166

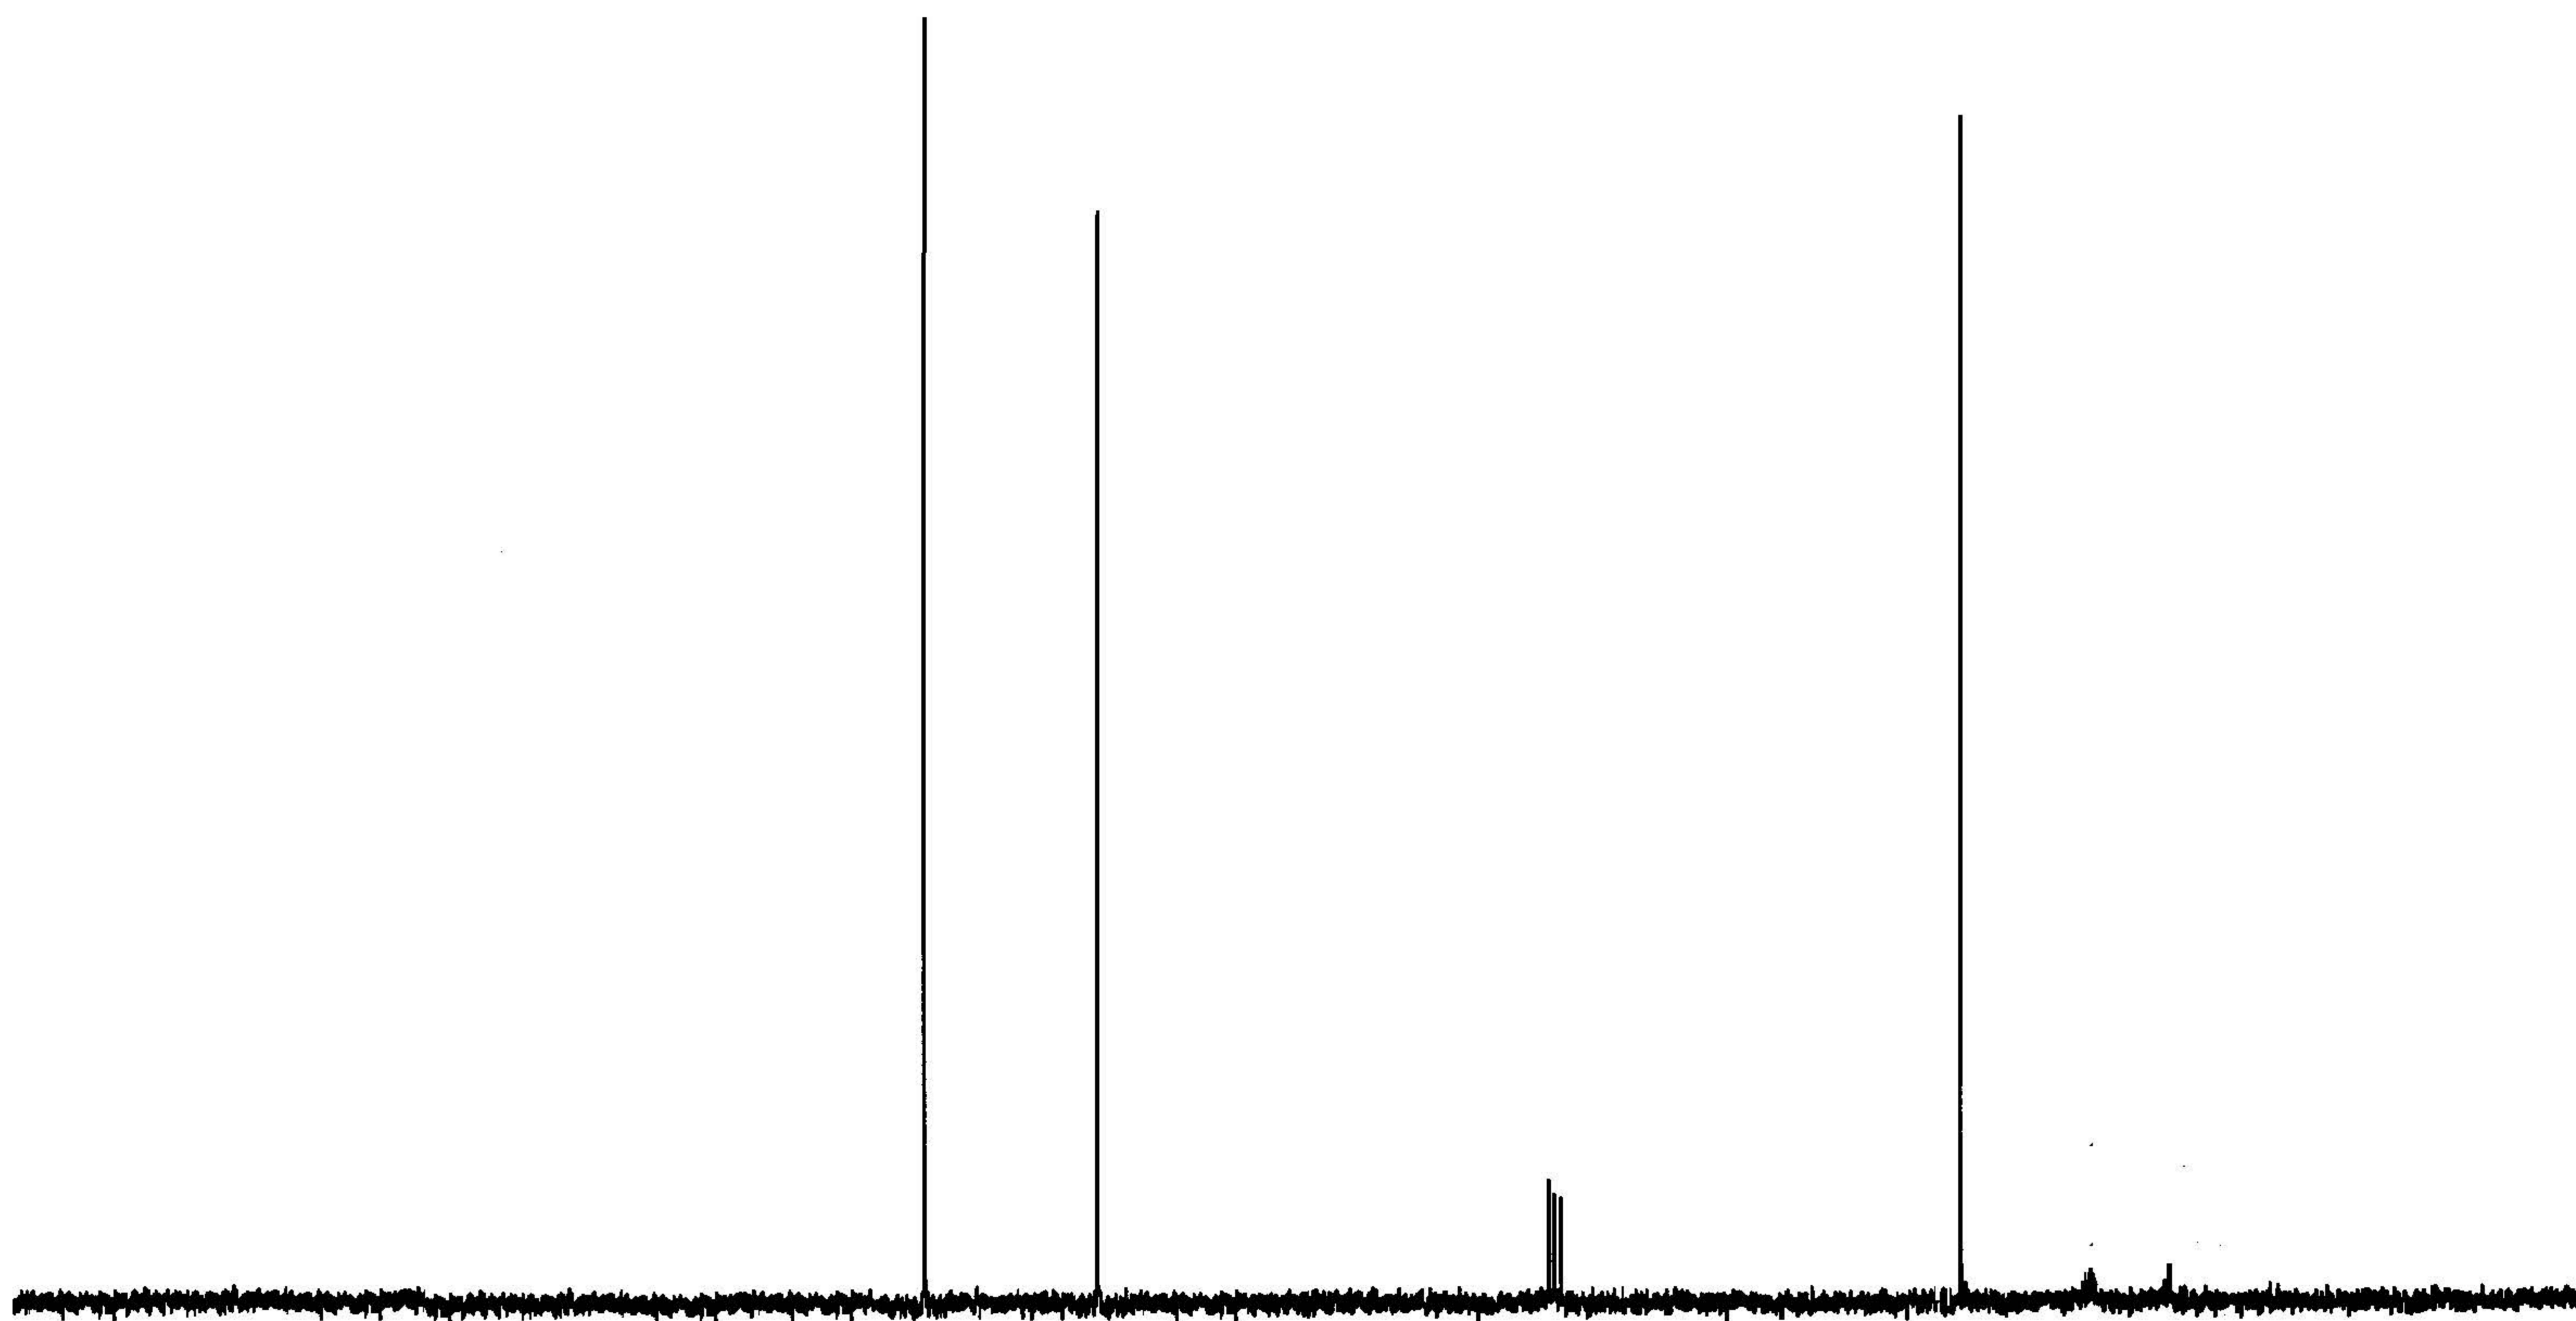

ppm 200 175 150 125 100 75 50 25 0

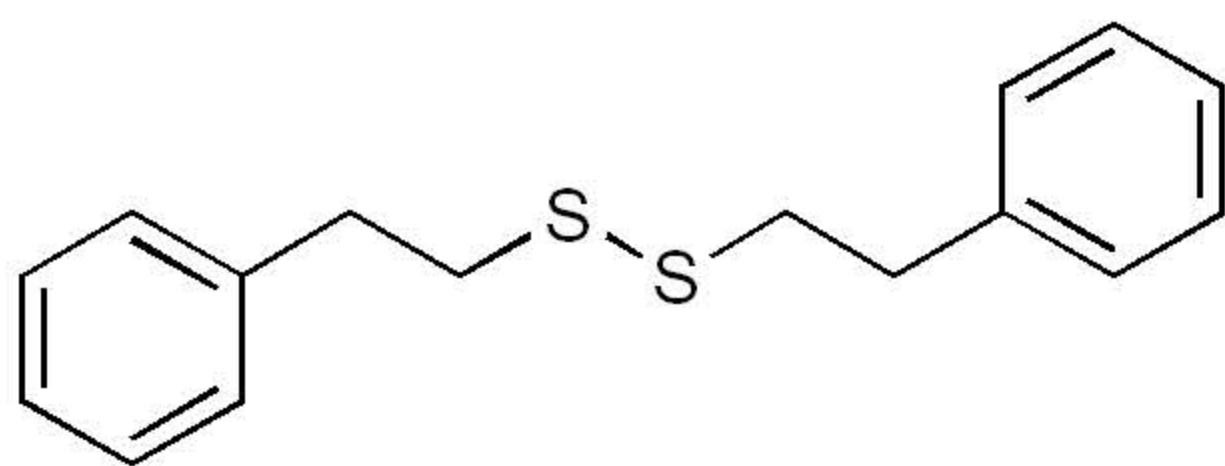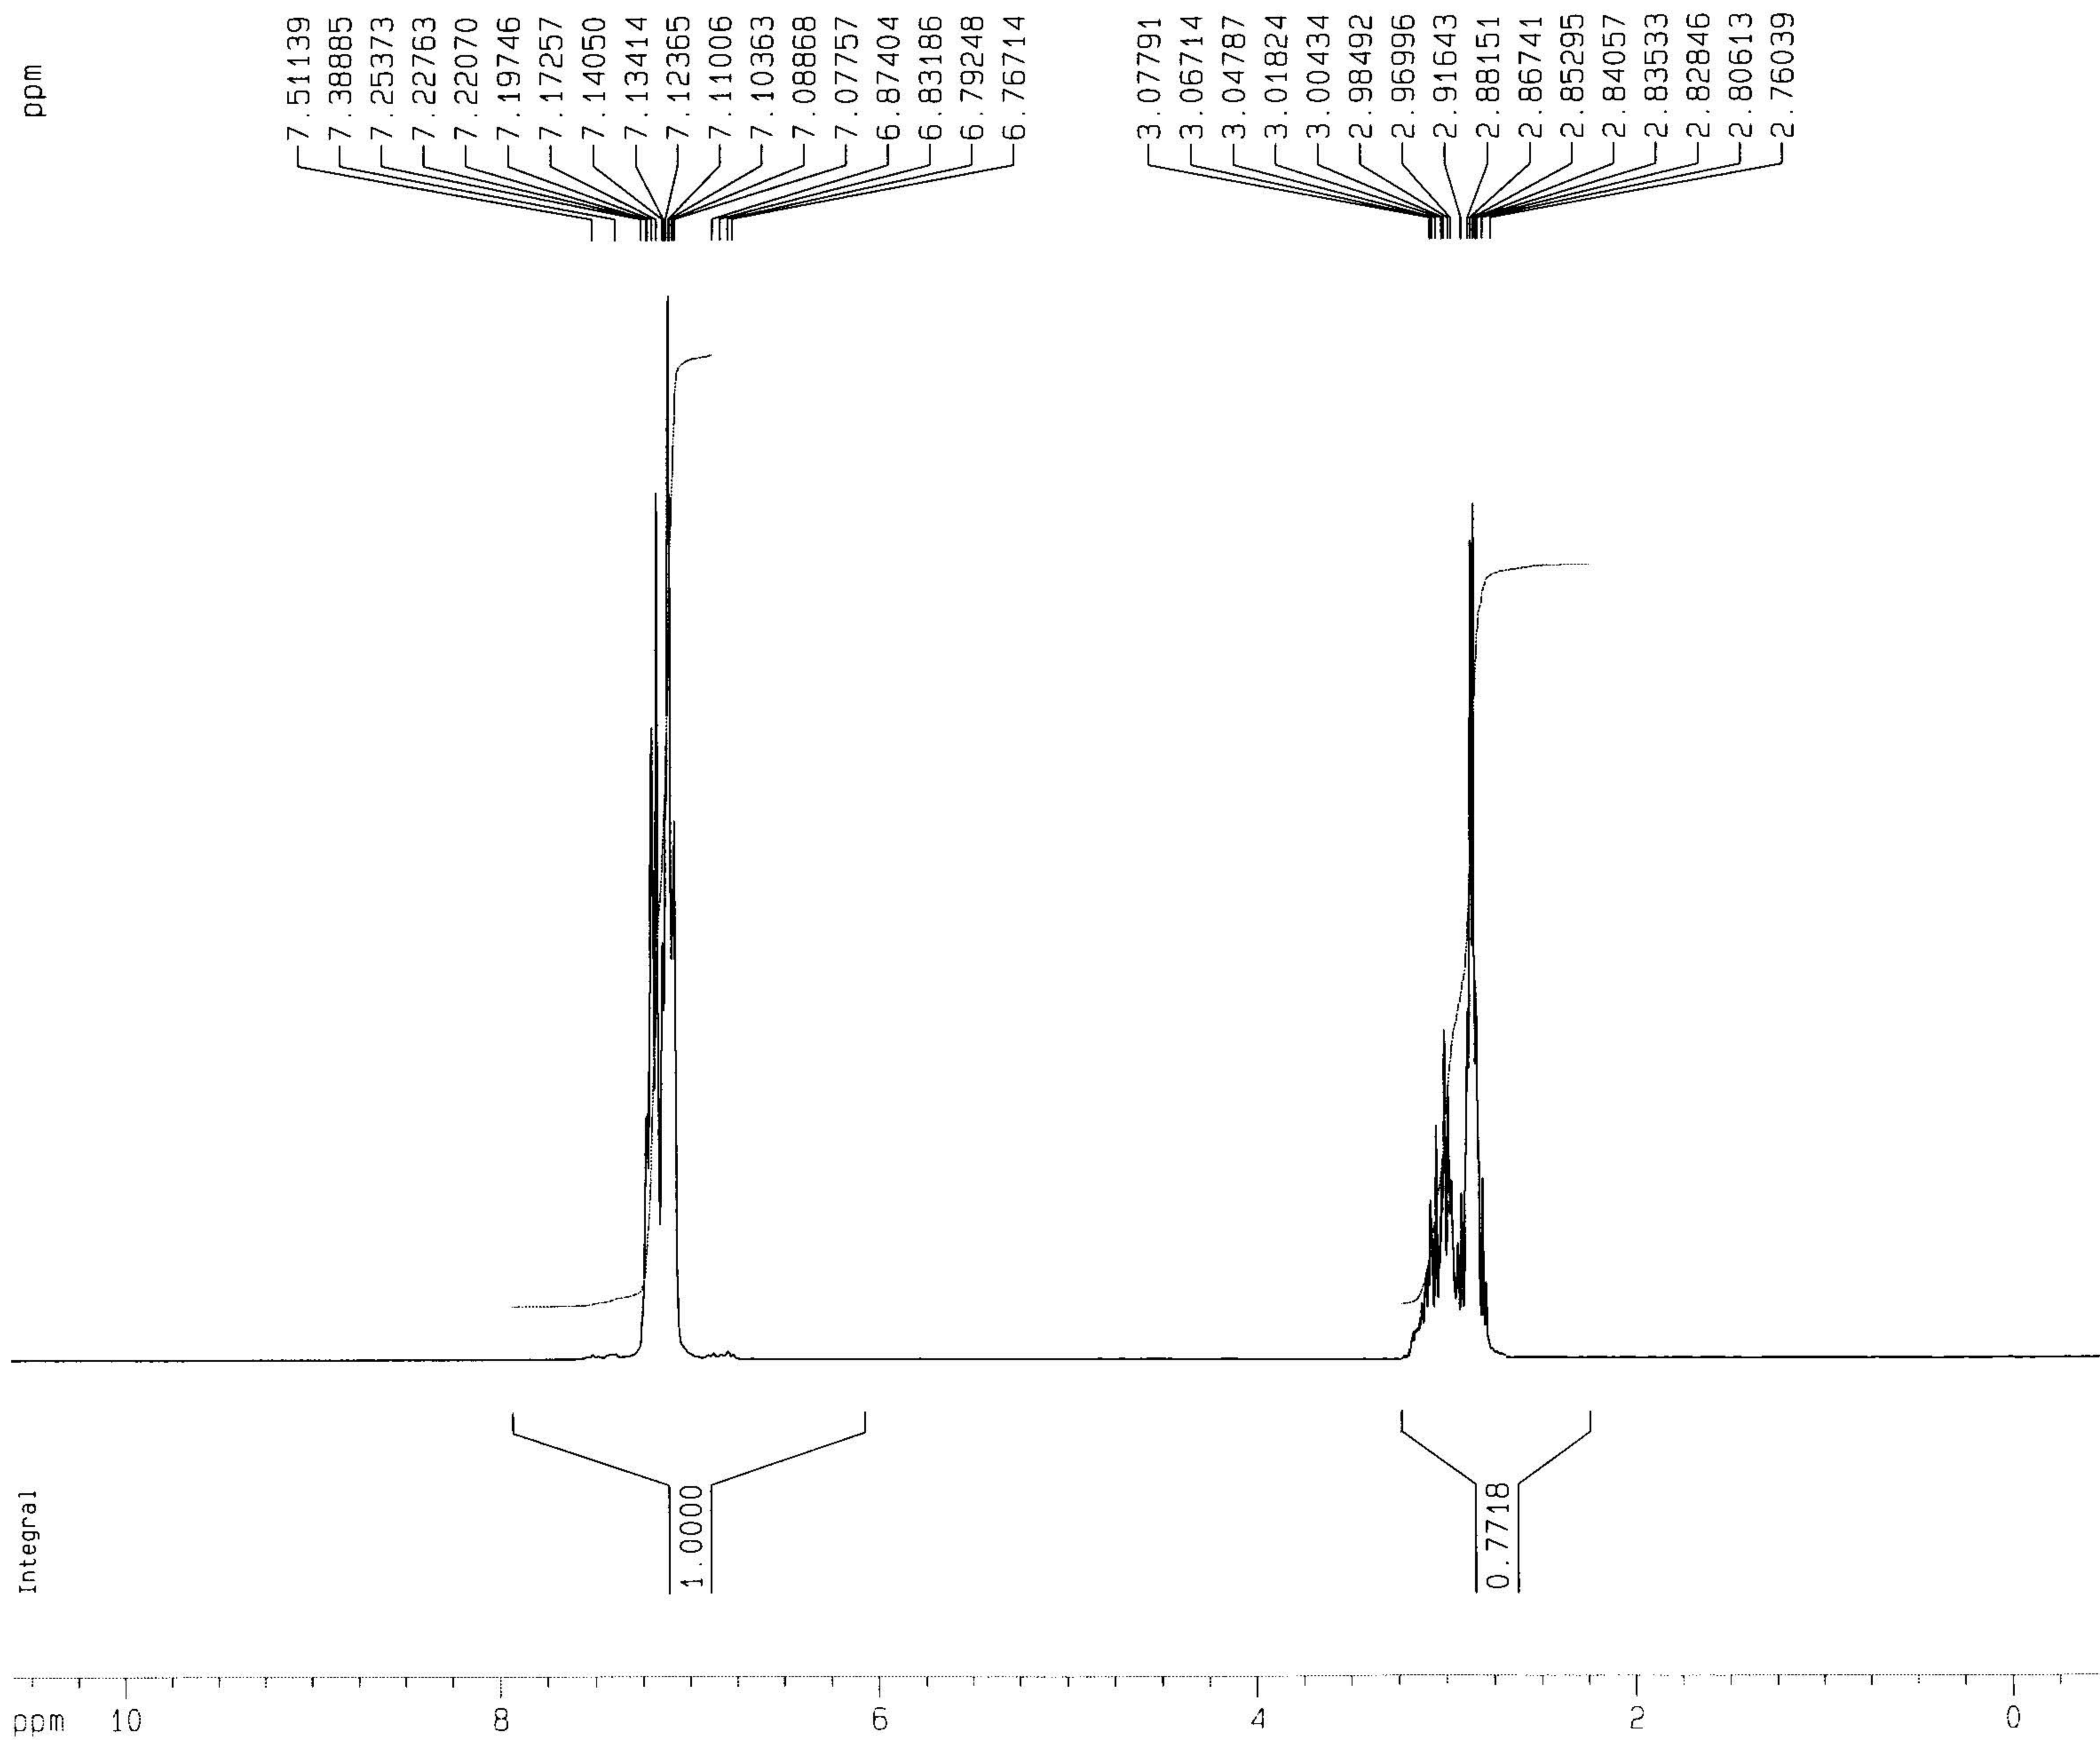

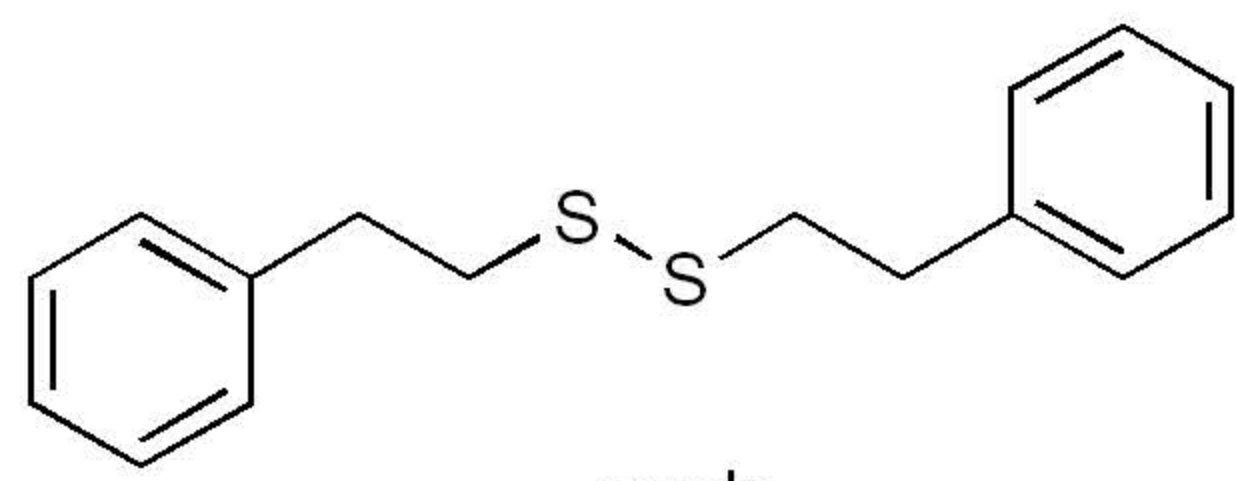

ppm

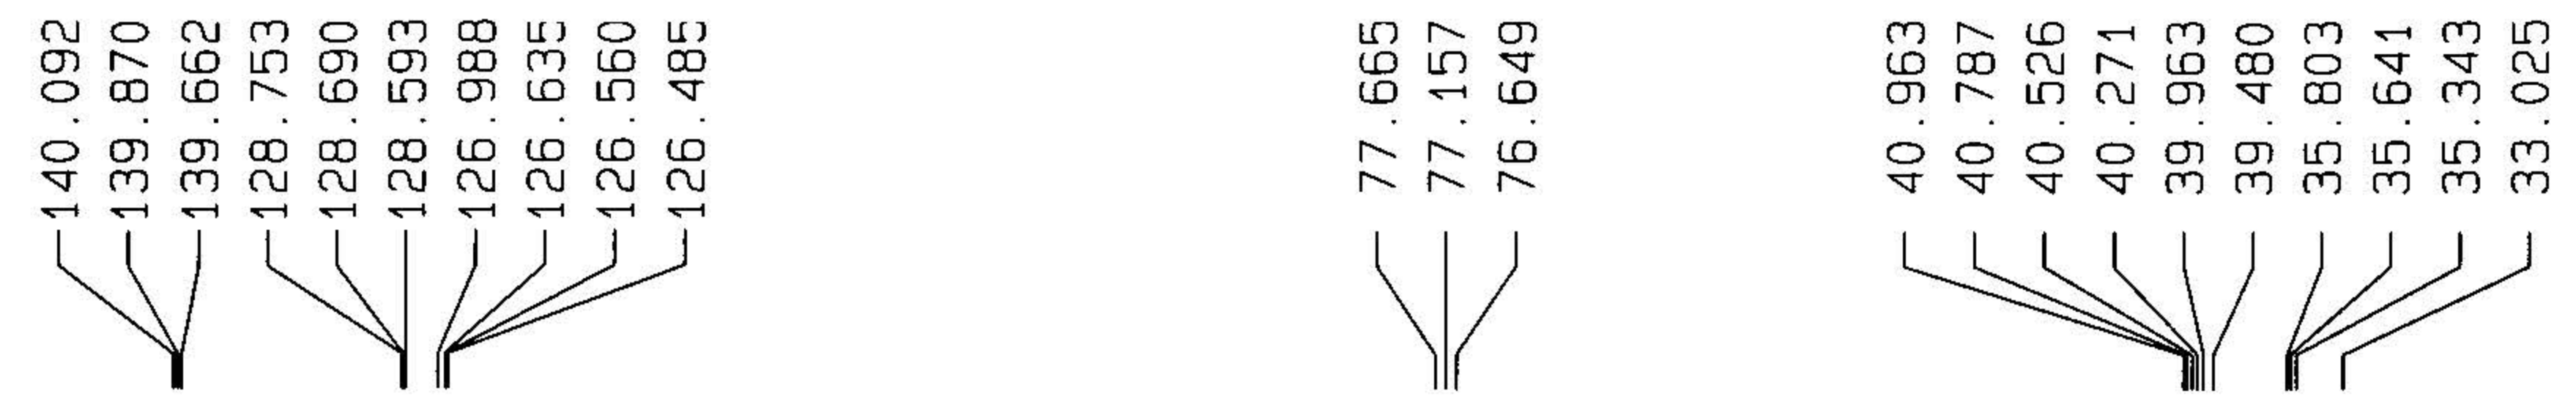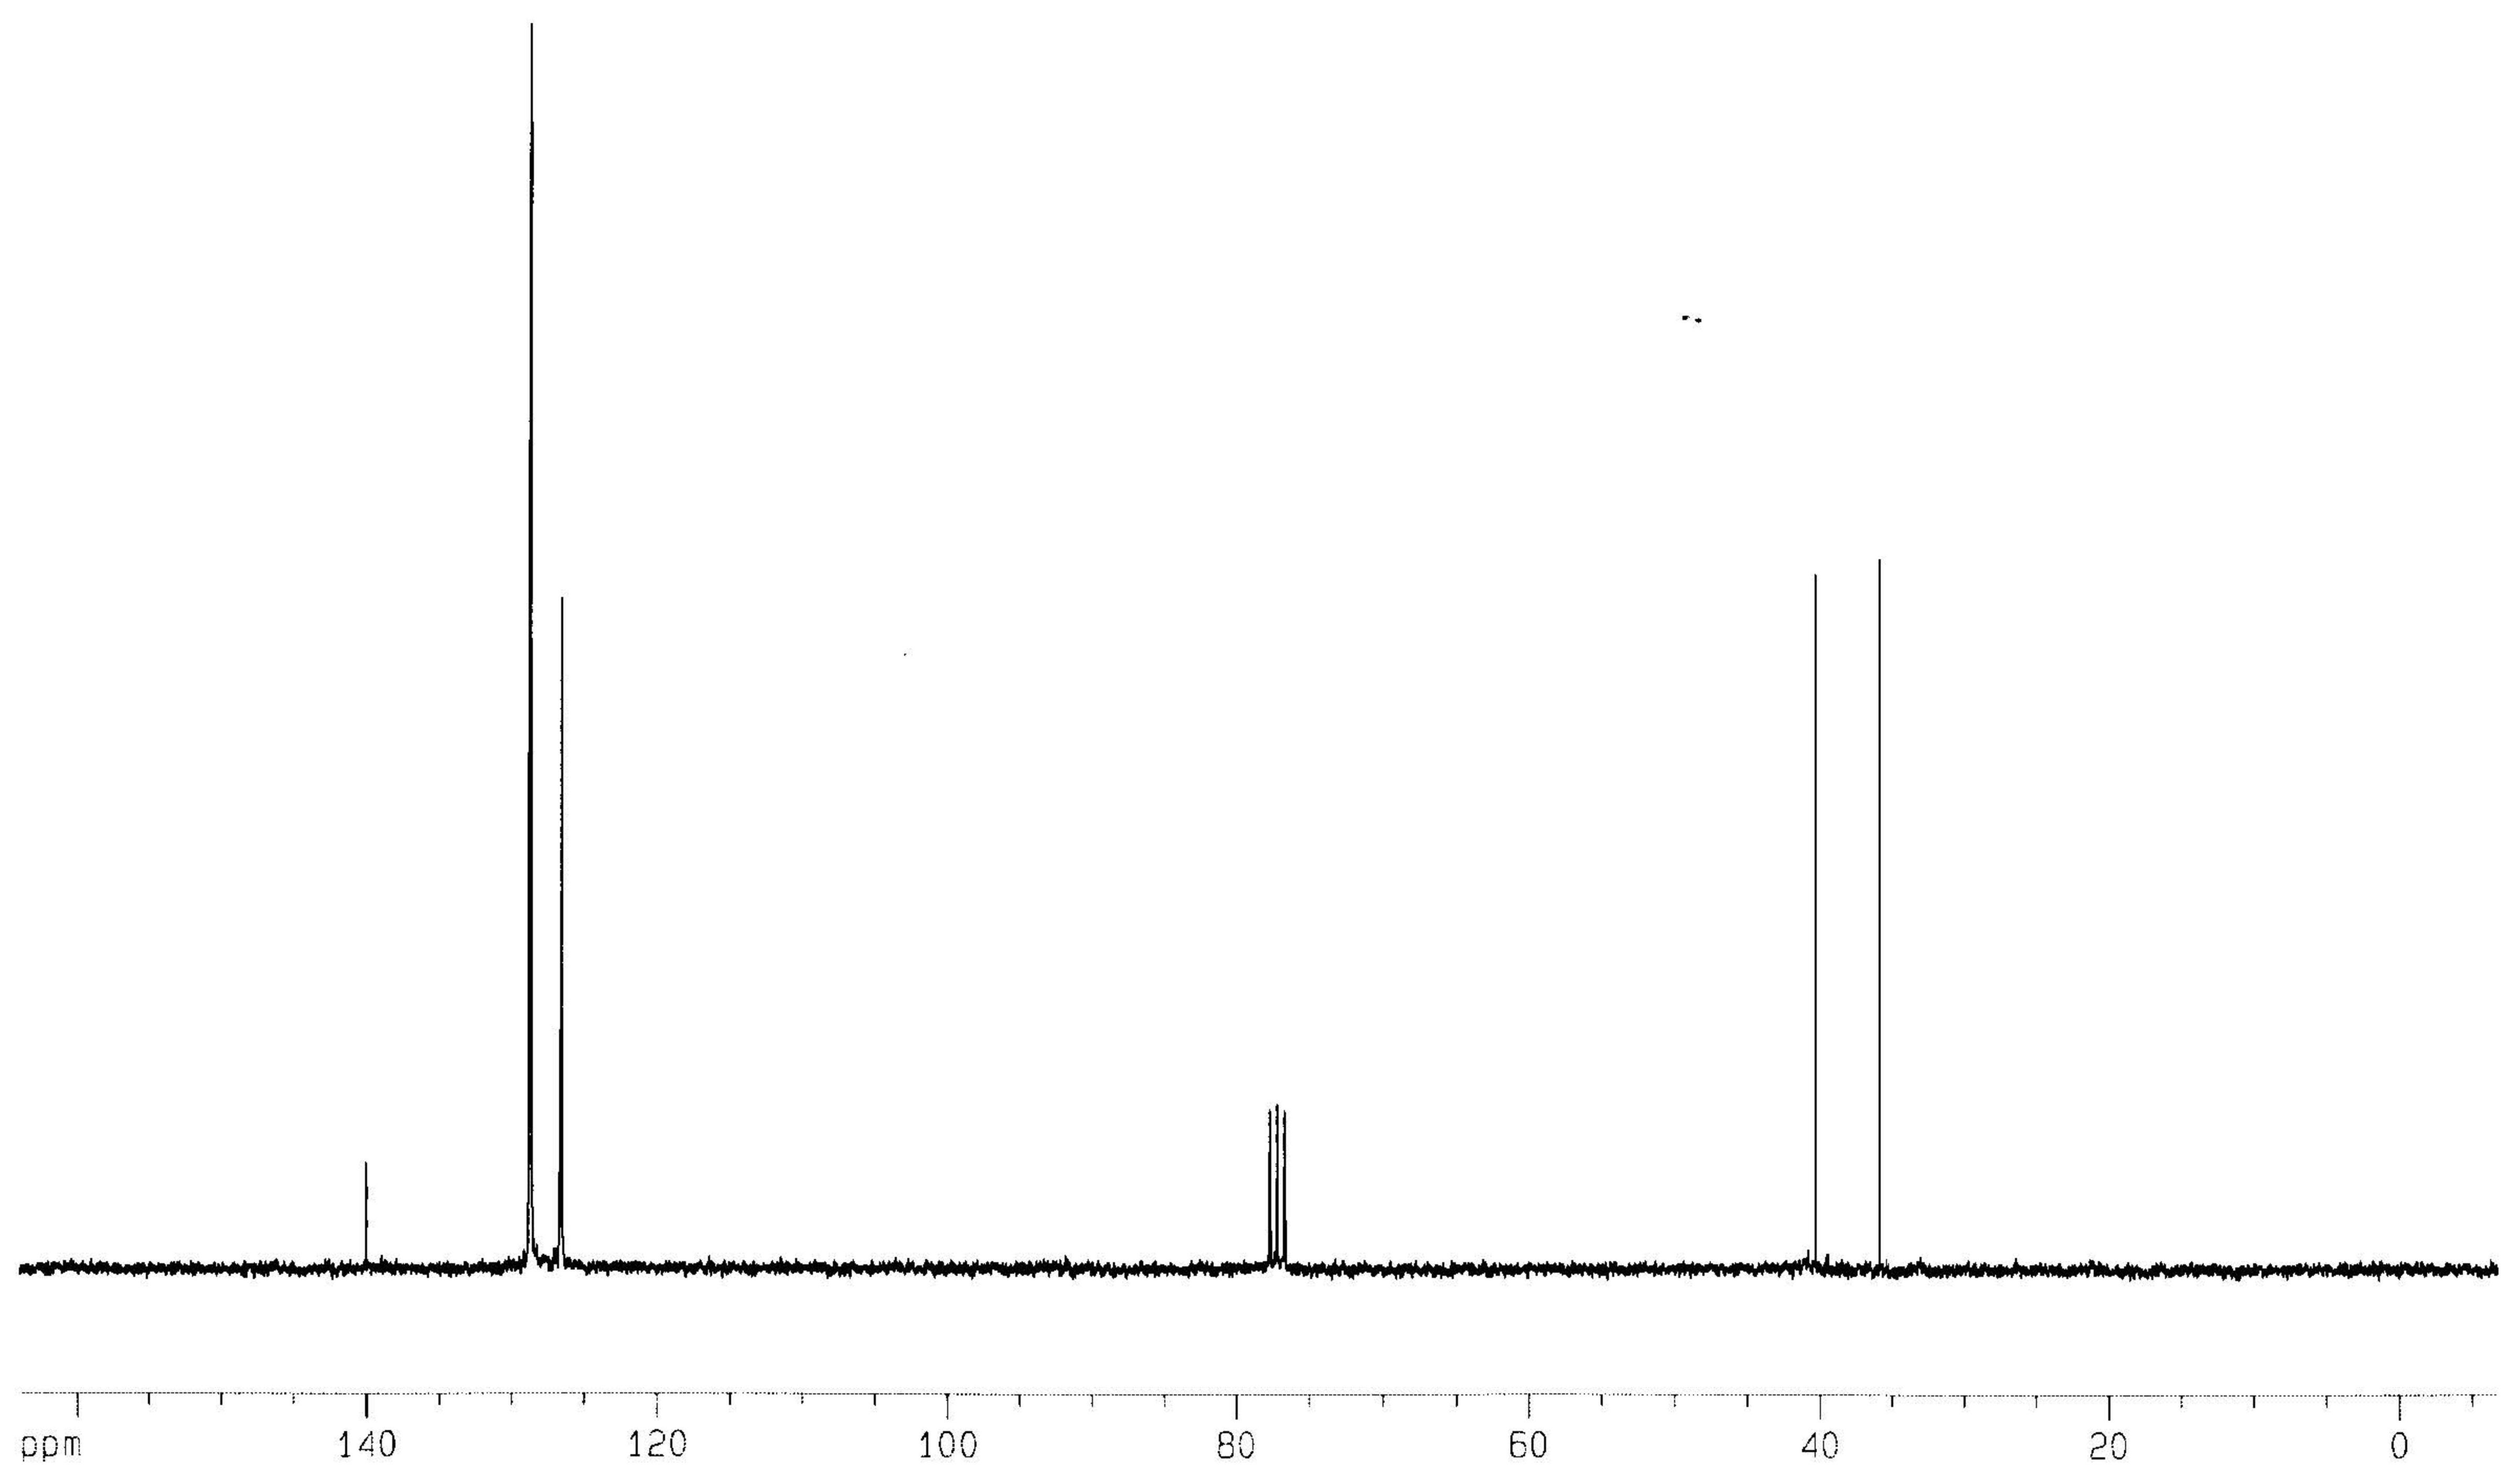

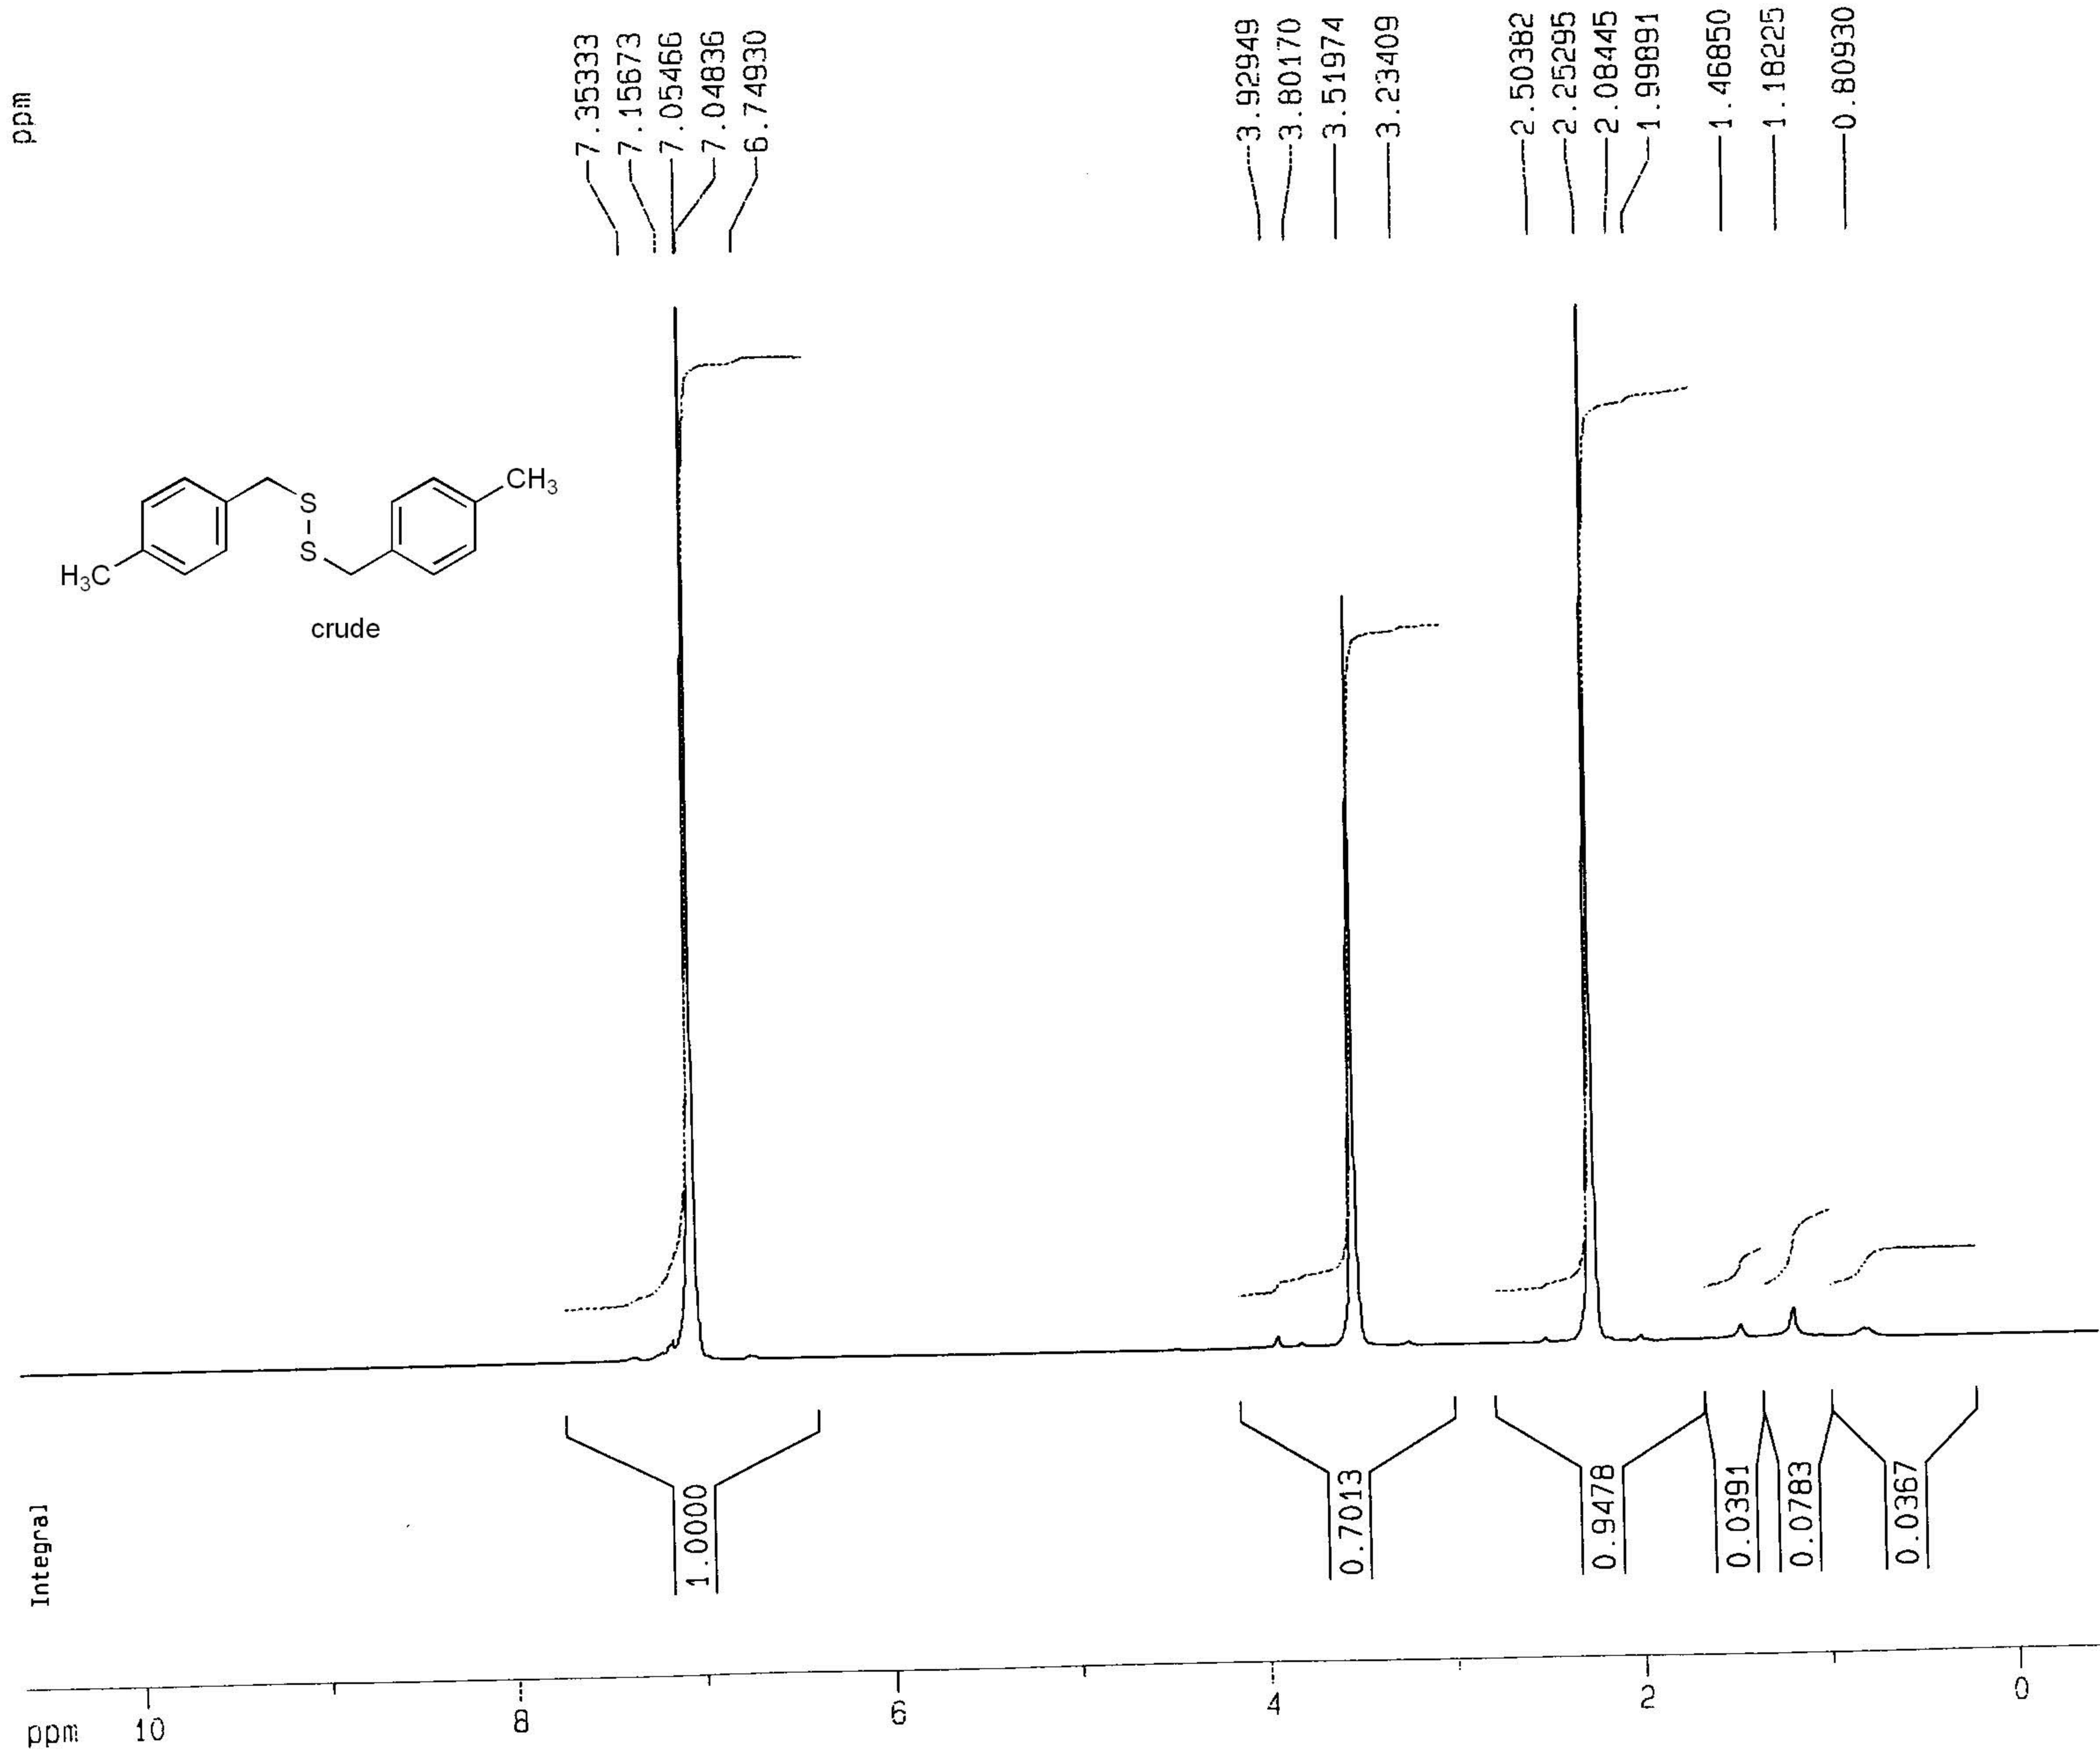

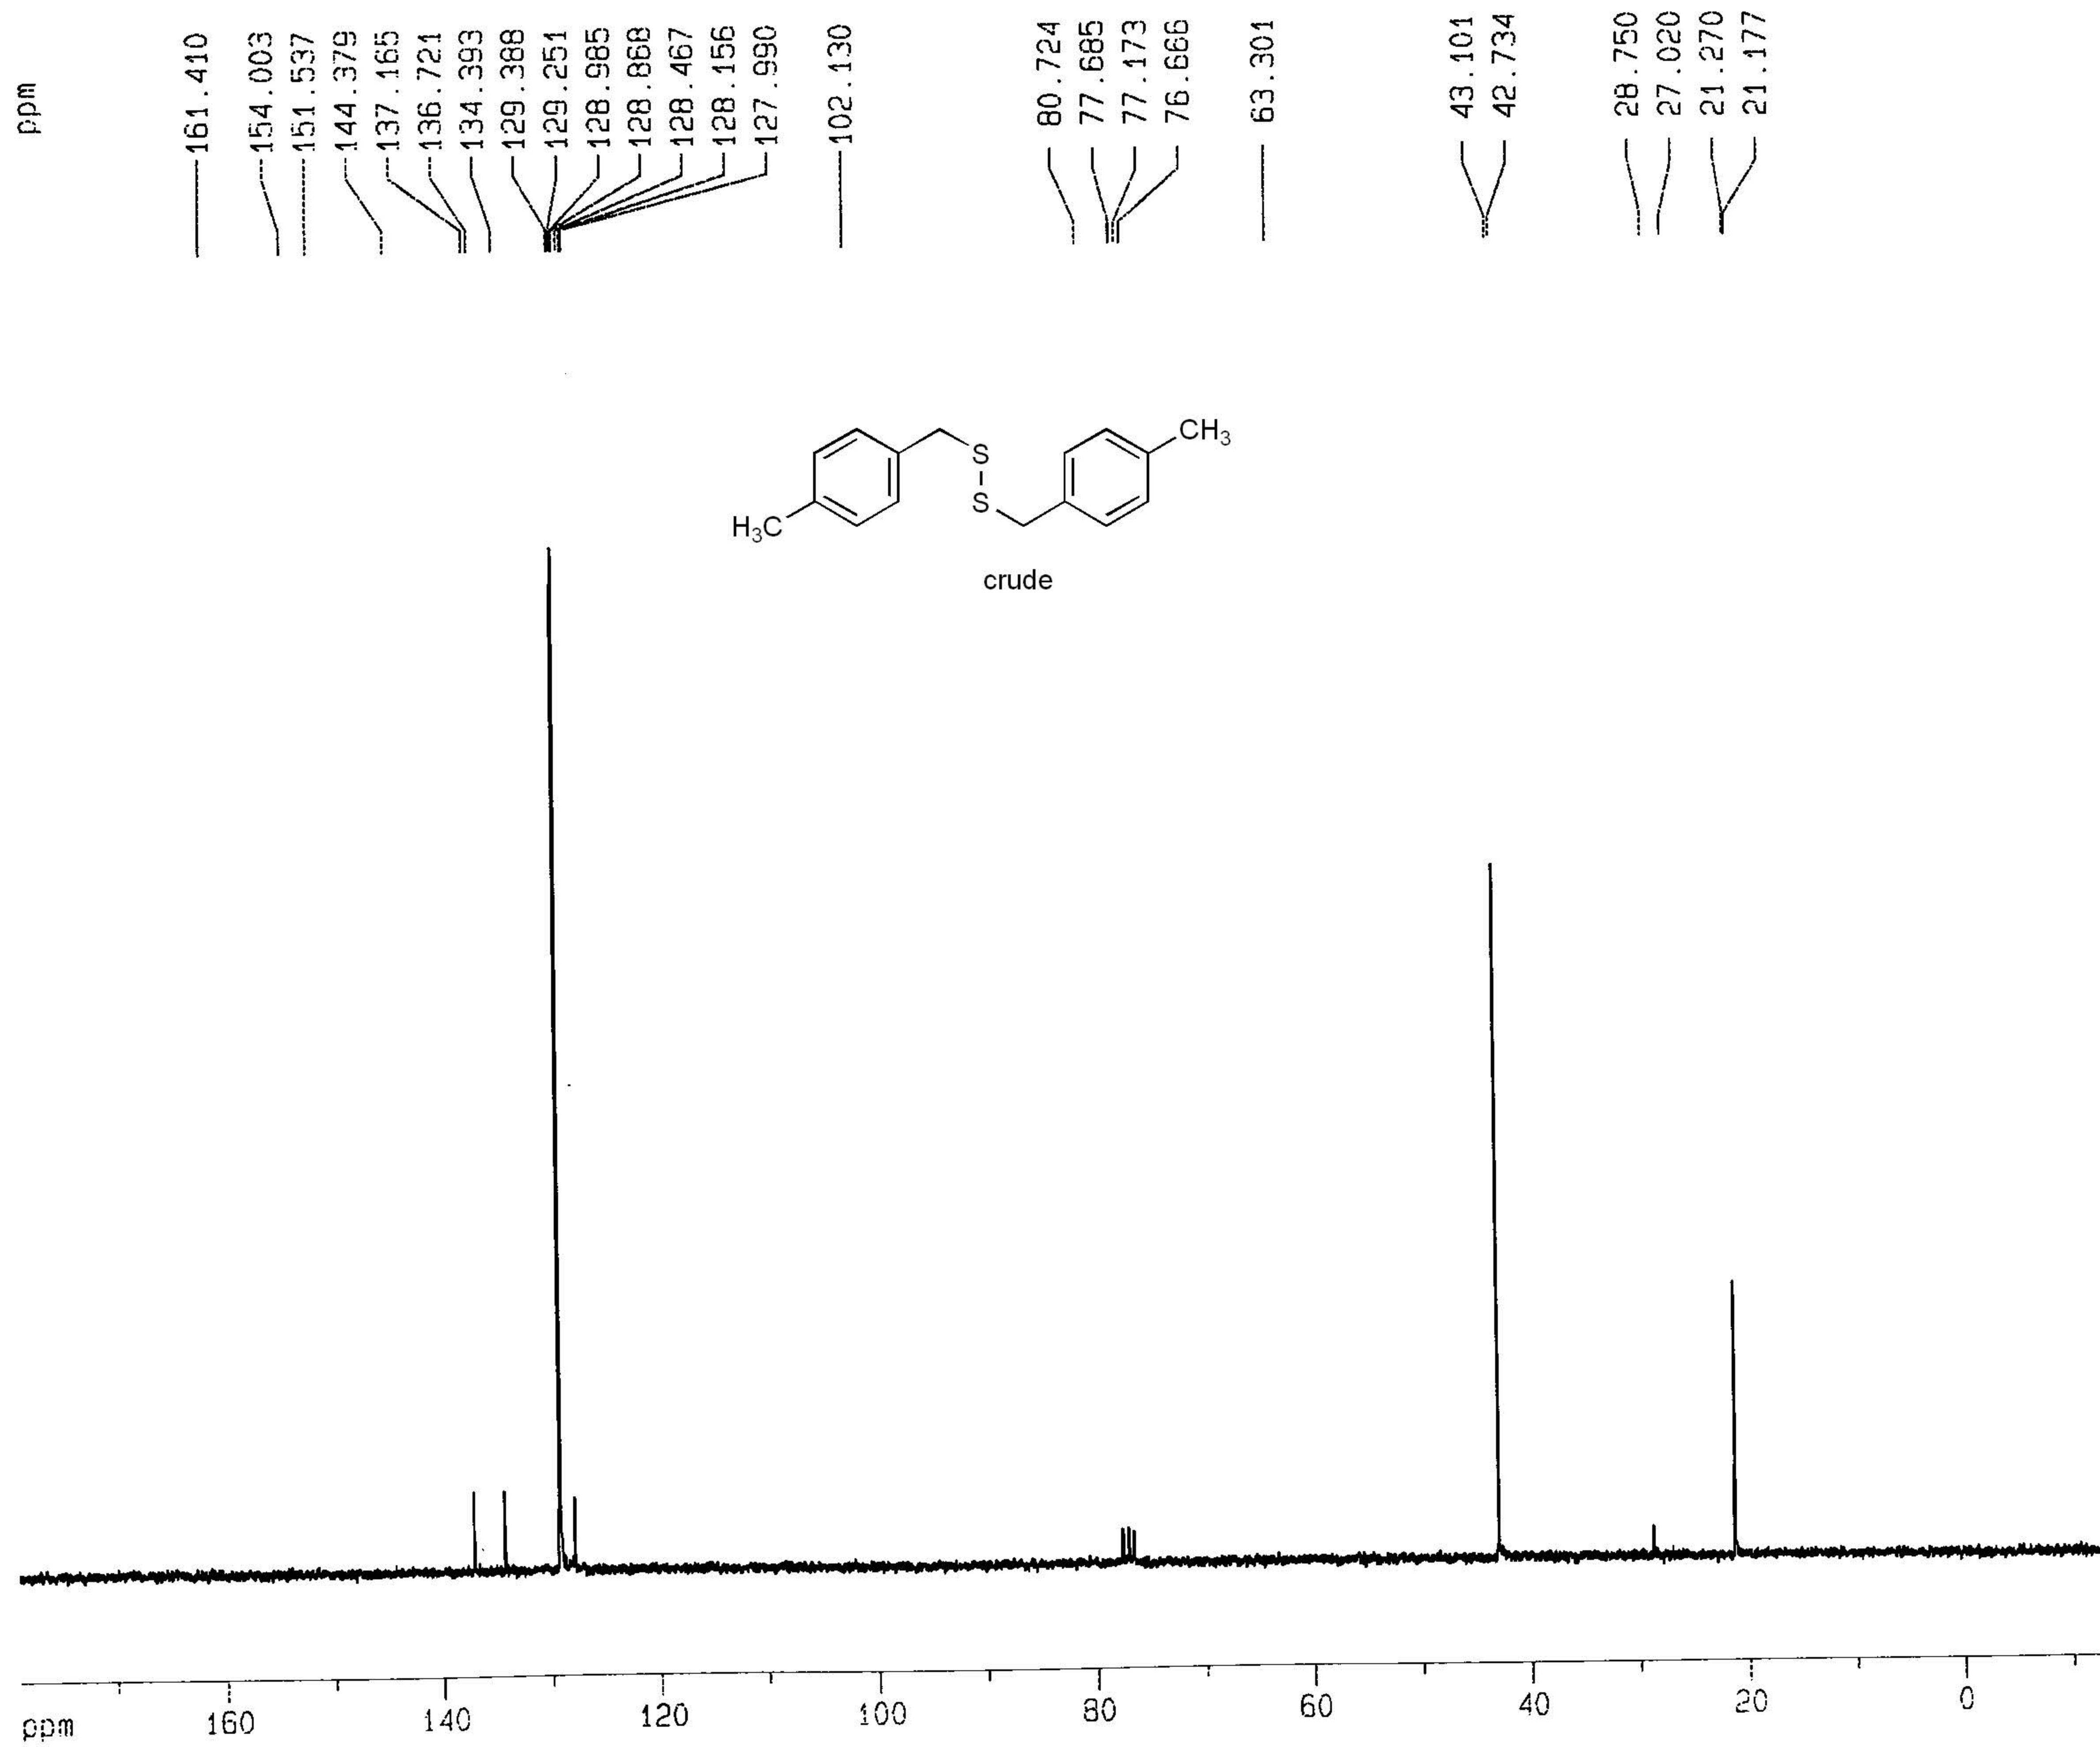

7.30083  
7.29165  
7.28514  
7.27779  
7.26860  
7.18928  
7.17982  
7.17523  
7.16582  
7.15593  
7.14642  
7.13737  
7.13235  
7.12316  
7.11293  
3.73129  
3.69904  
1.18244

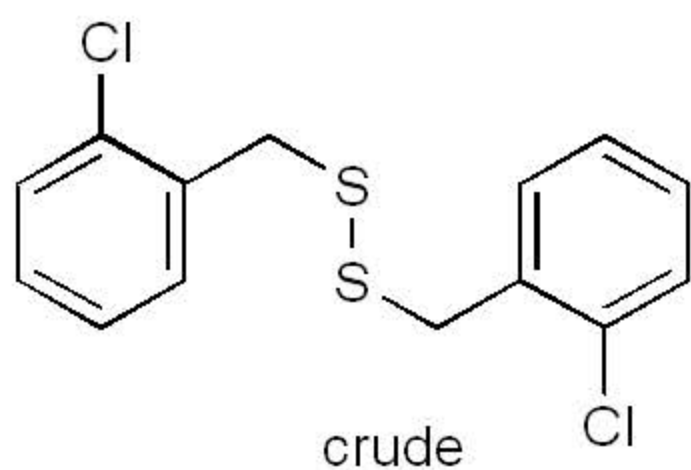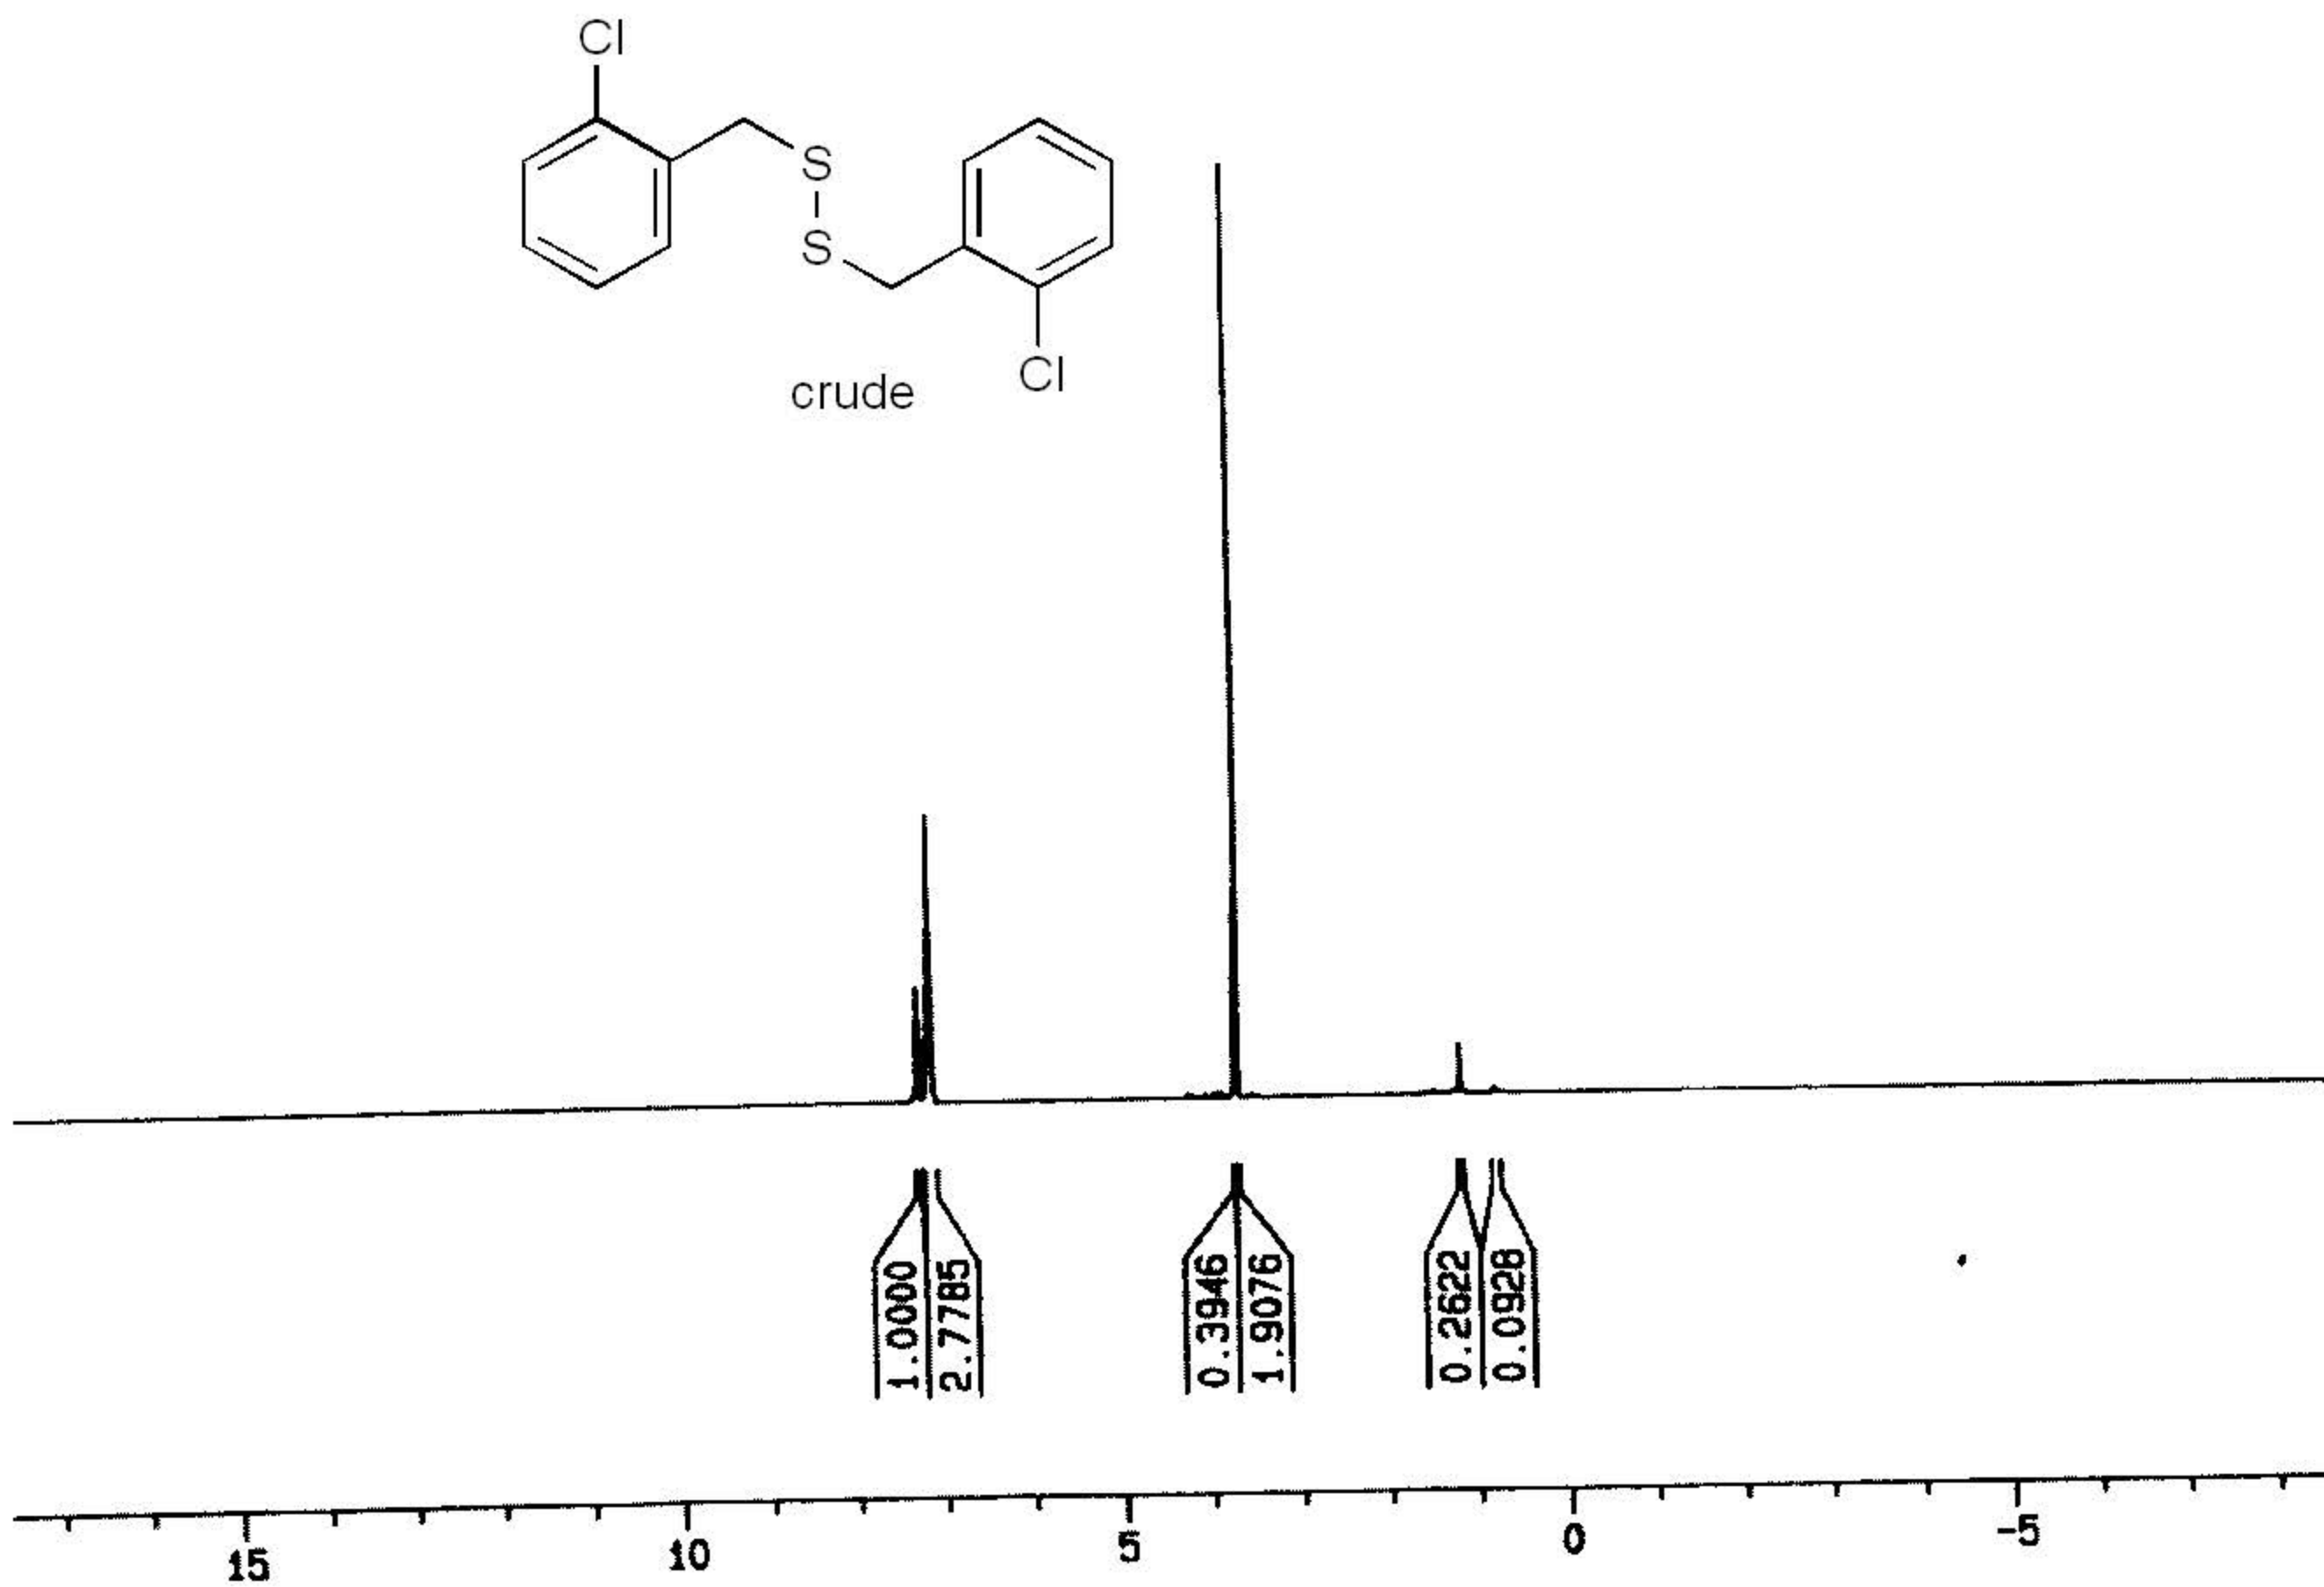



134.614  
133.915  
133.063  
131.441  
130.531  
129.648  
128.835  
128.796  
128.669  
127.895  
127.391  
126.230  
125.771  
125.663

76.318  
76.000  
75.683

54.977

40.011  
32.703  
28.656

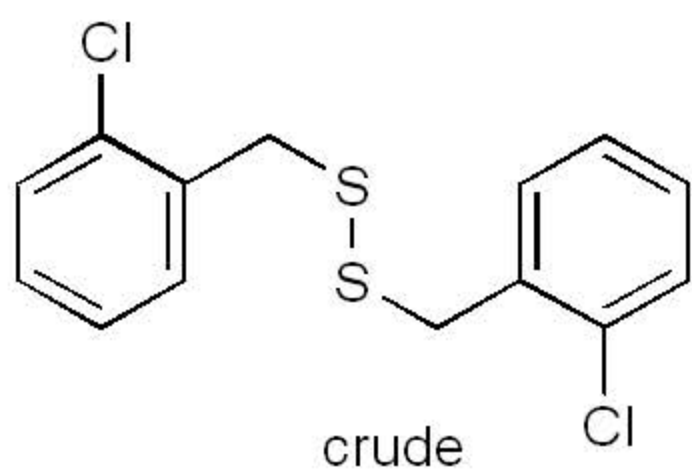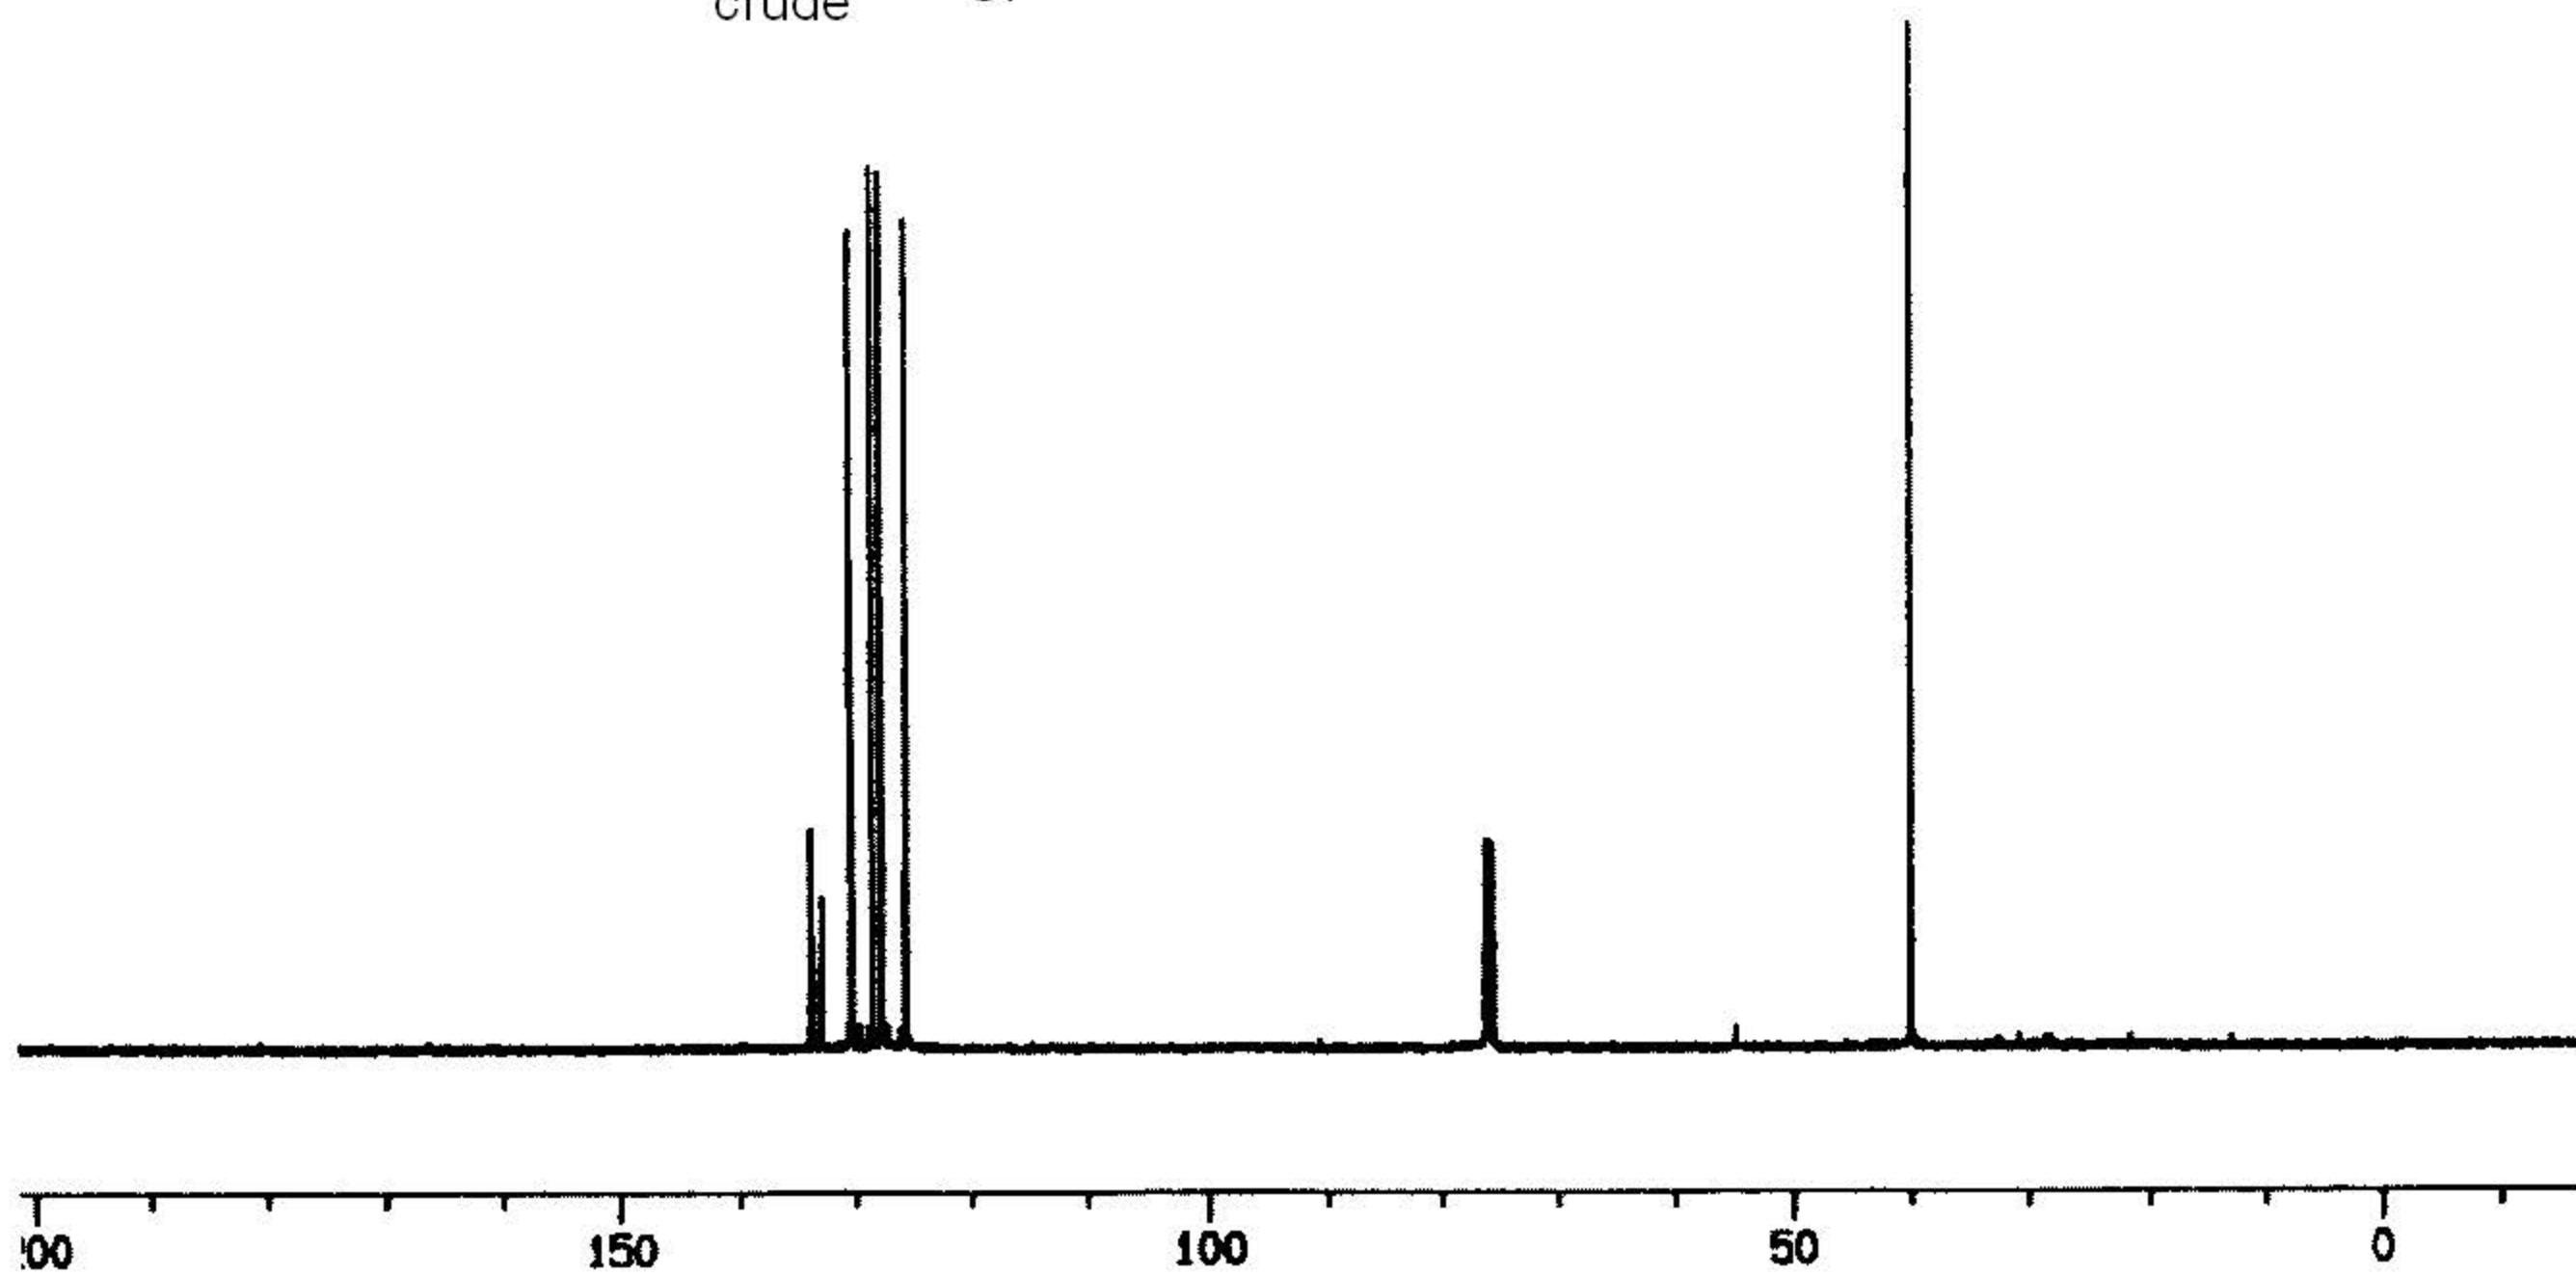

page 33

135.760  
133.998  
129.490  
129.450  
126.730  
124.859

76.320  
76.000  
75.686

40.544

28.666

18.249

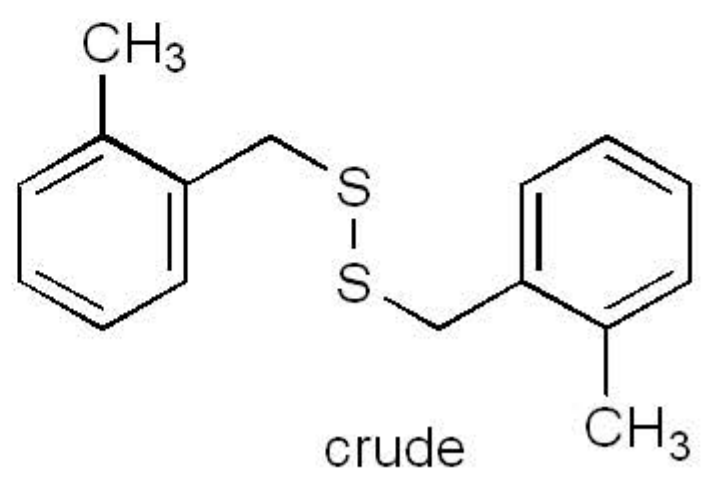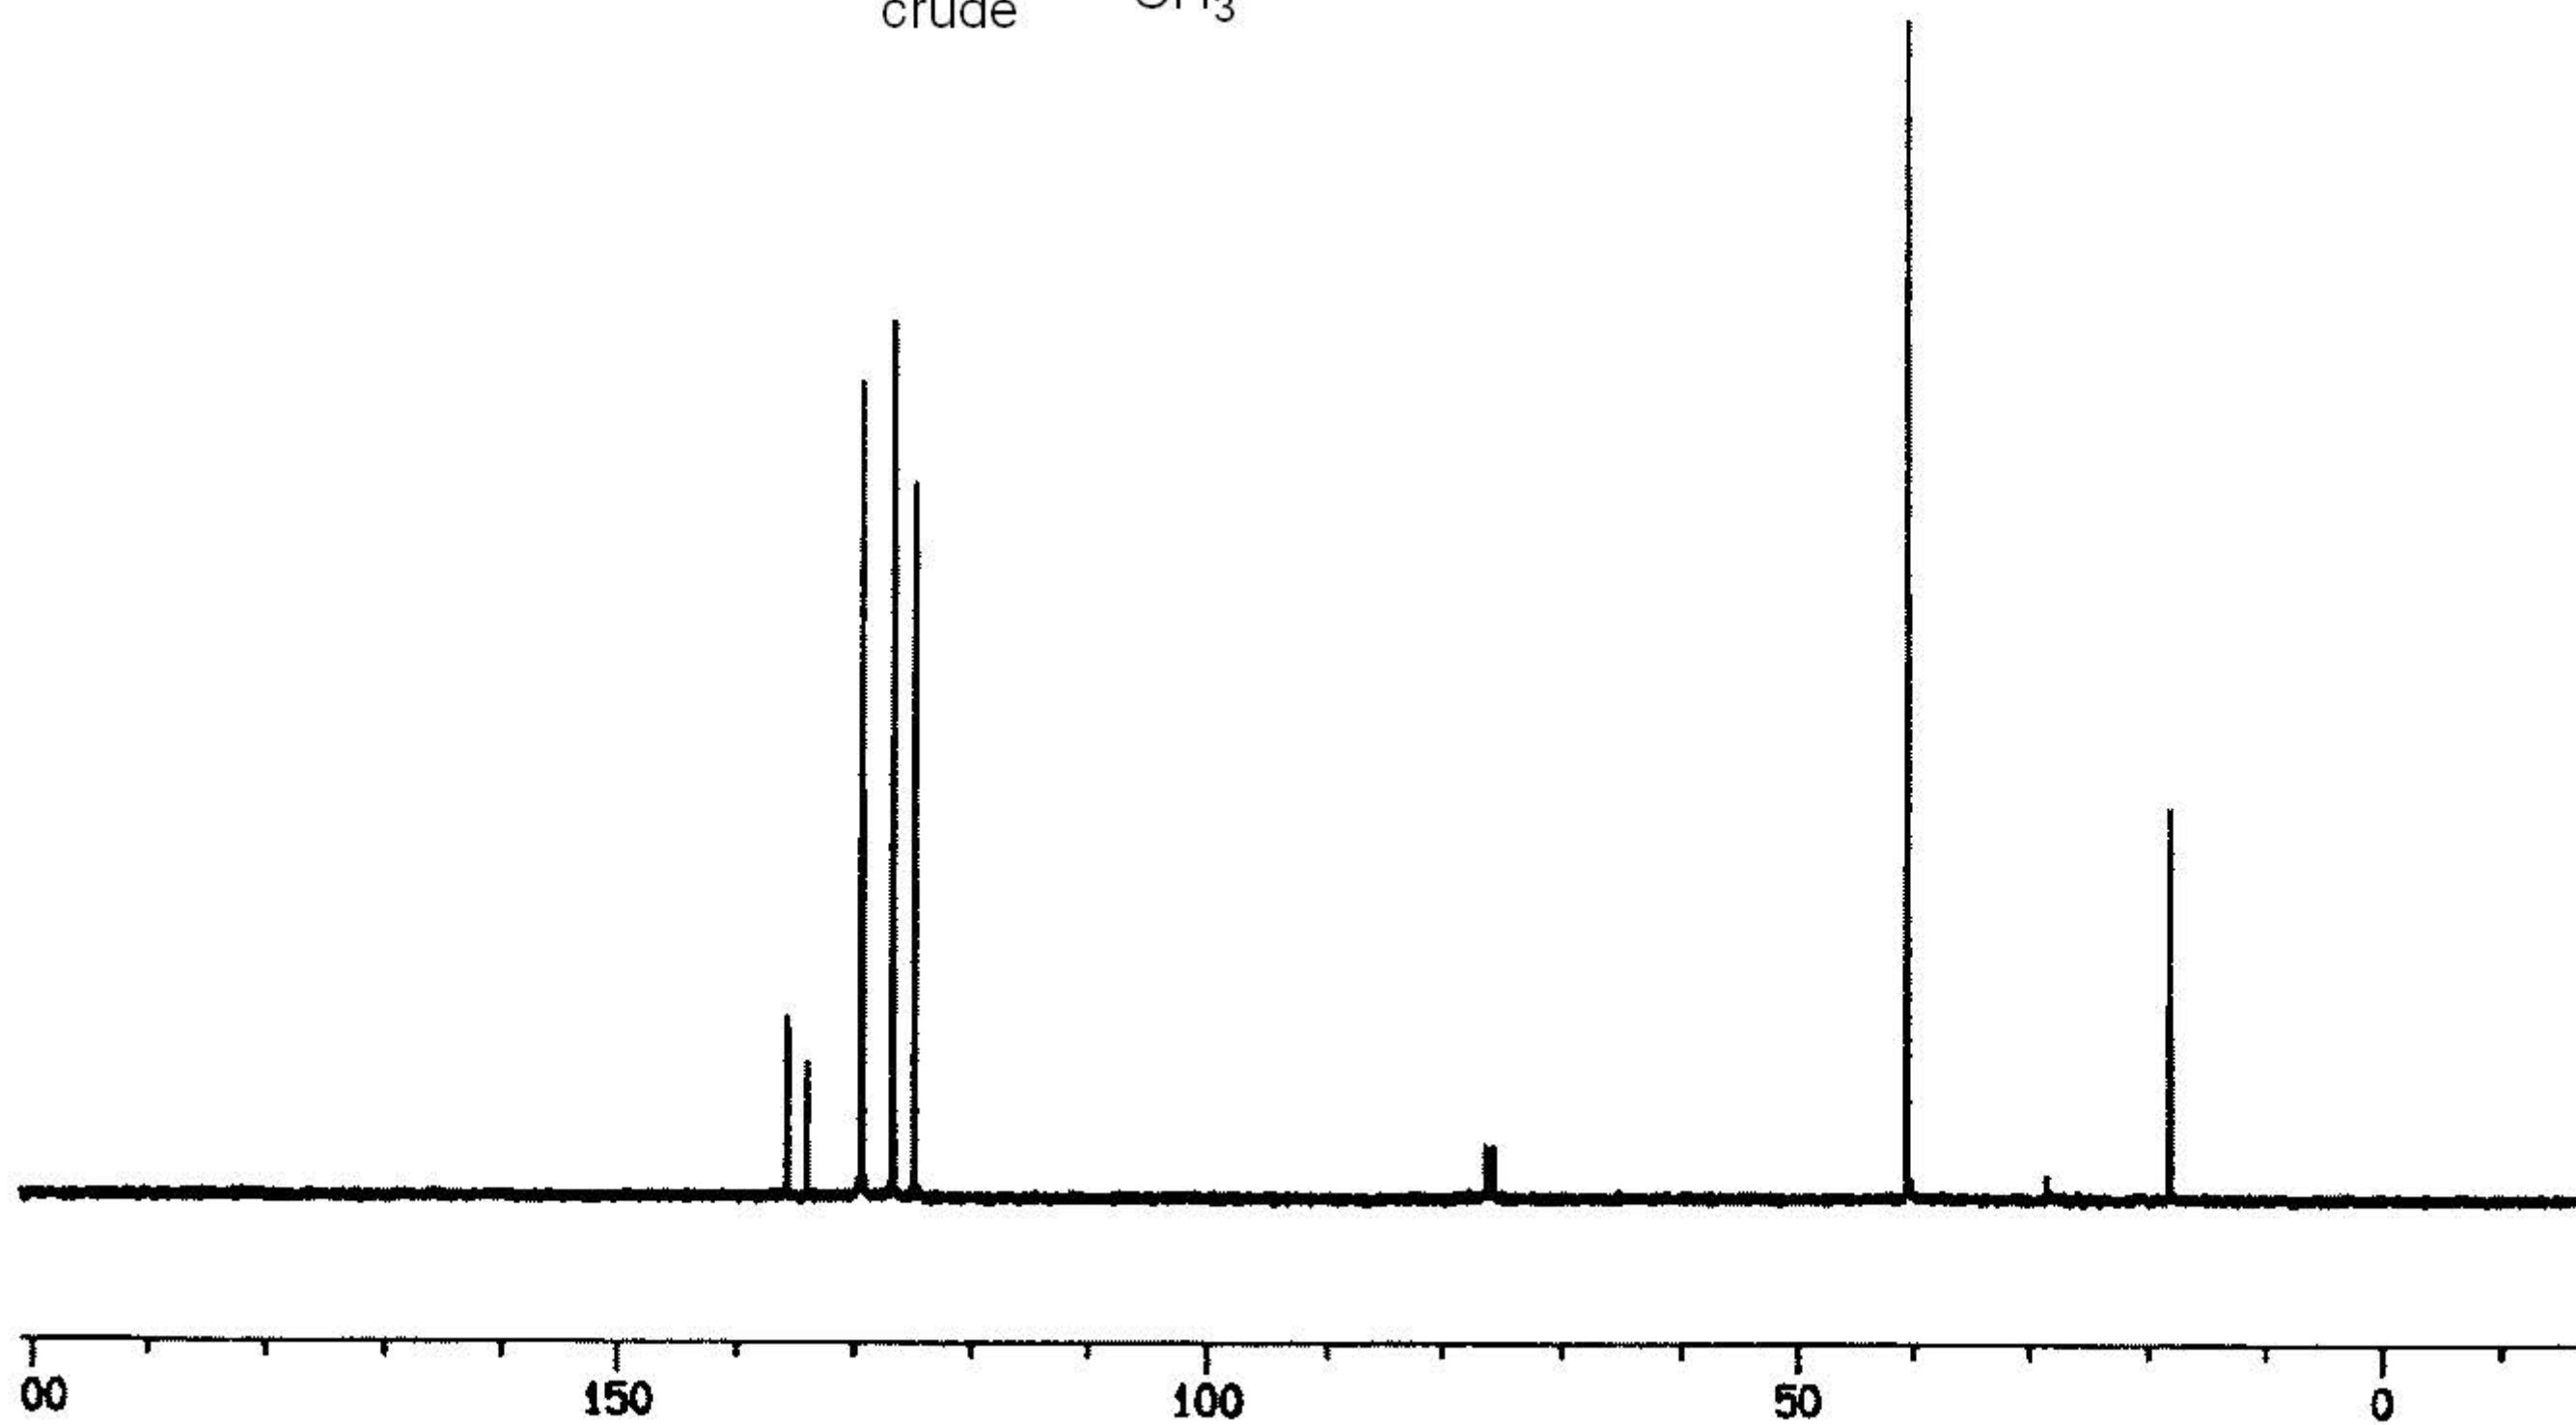

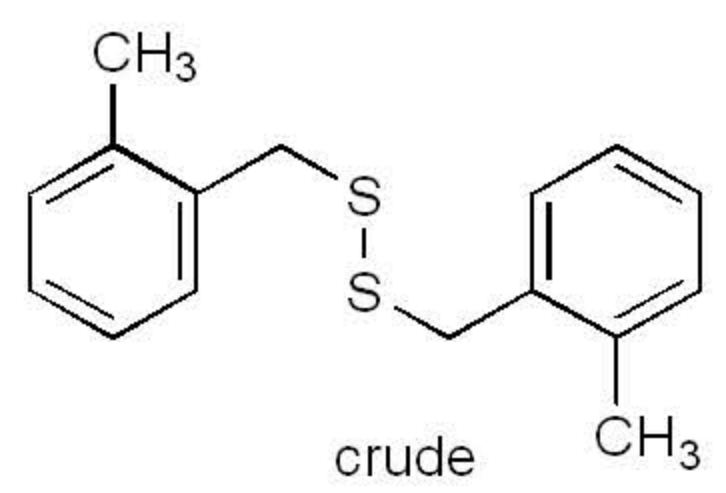

7.26000  
7.20627  
7.19985  
7.19067  
7.18407  
7.18141  
7.17356  
7.16820  
7.14814  
7.12794  
3.67034  
2.38286

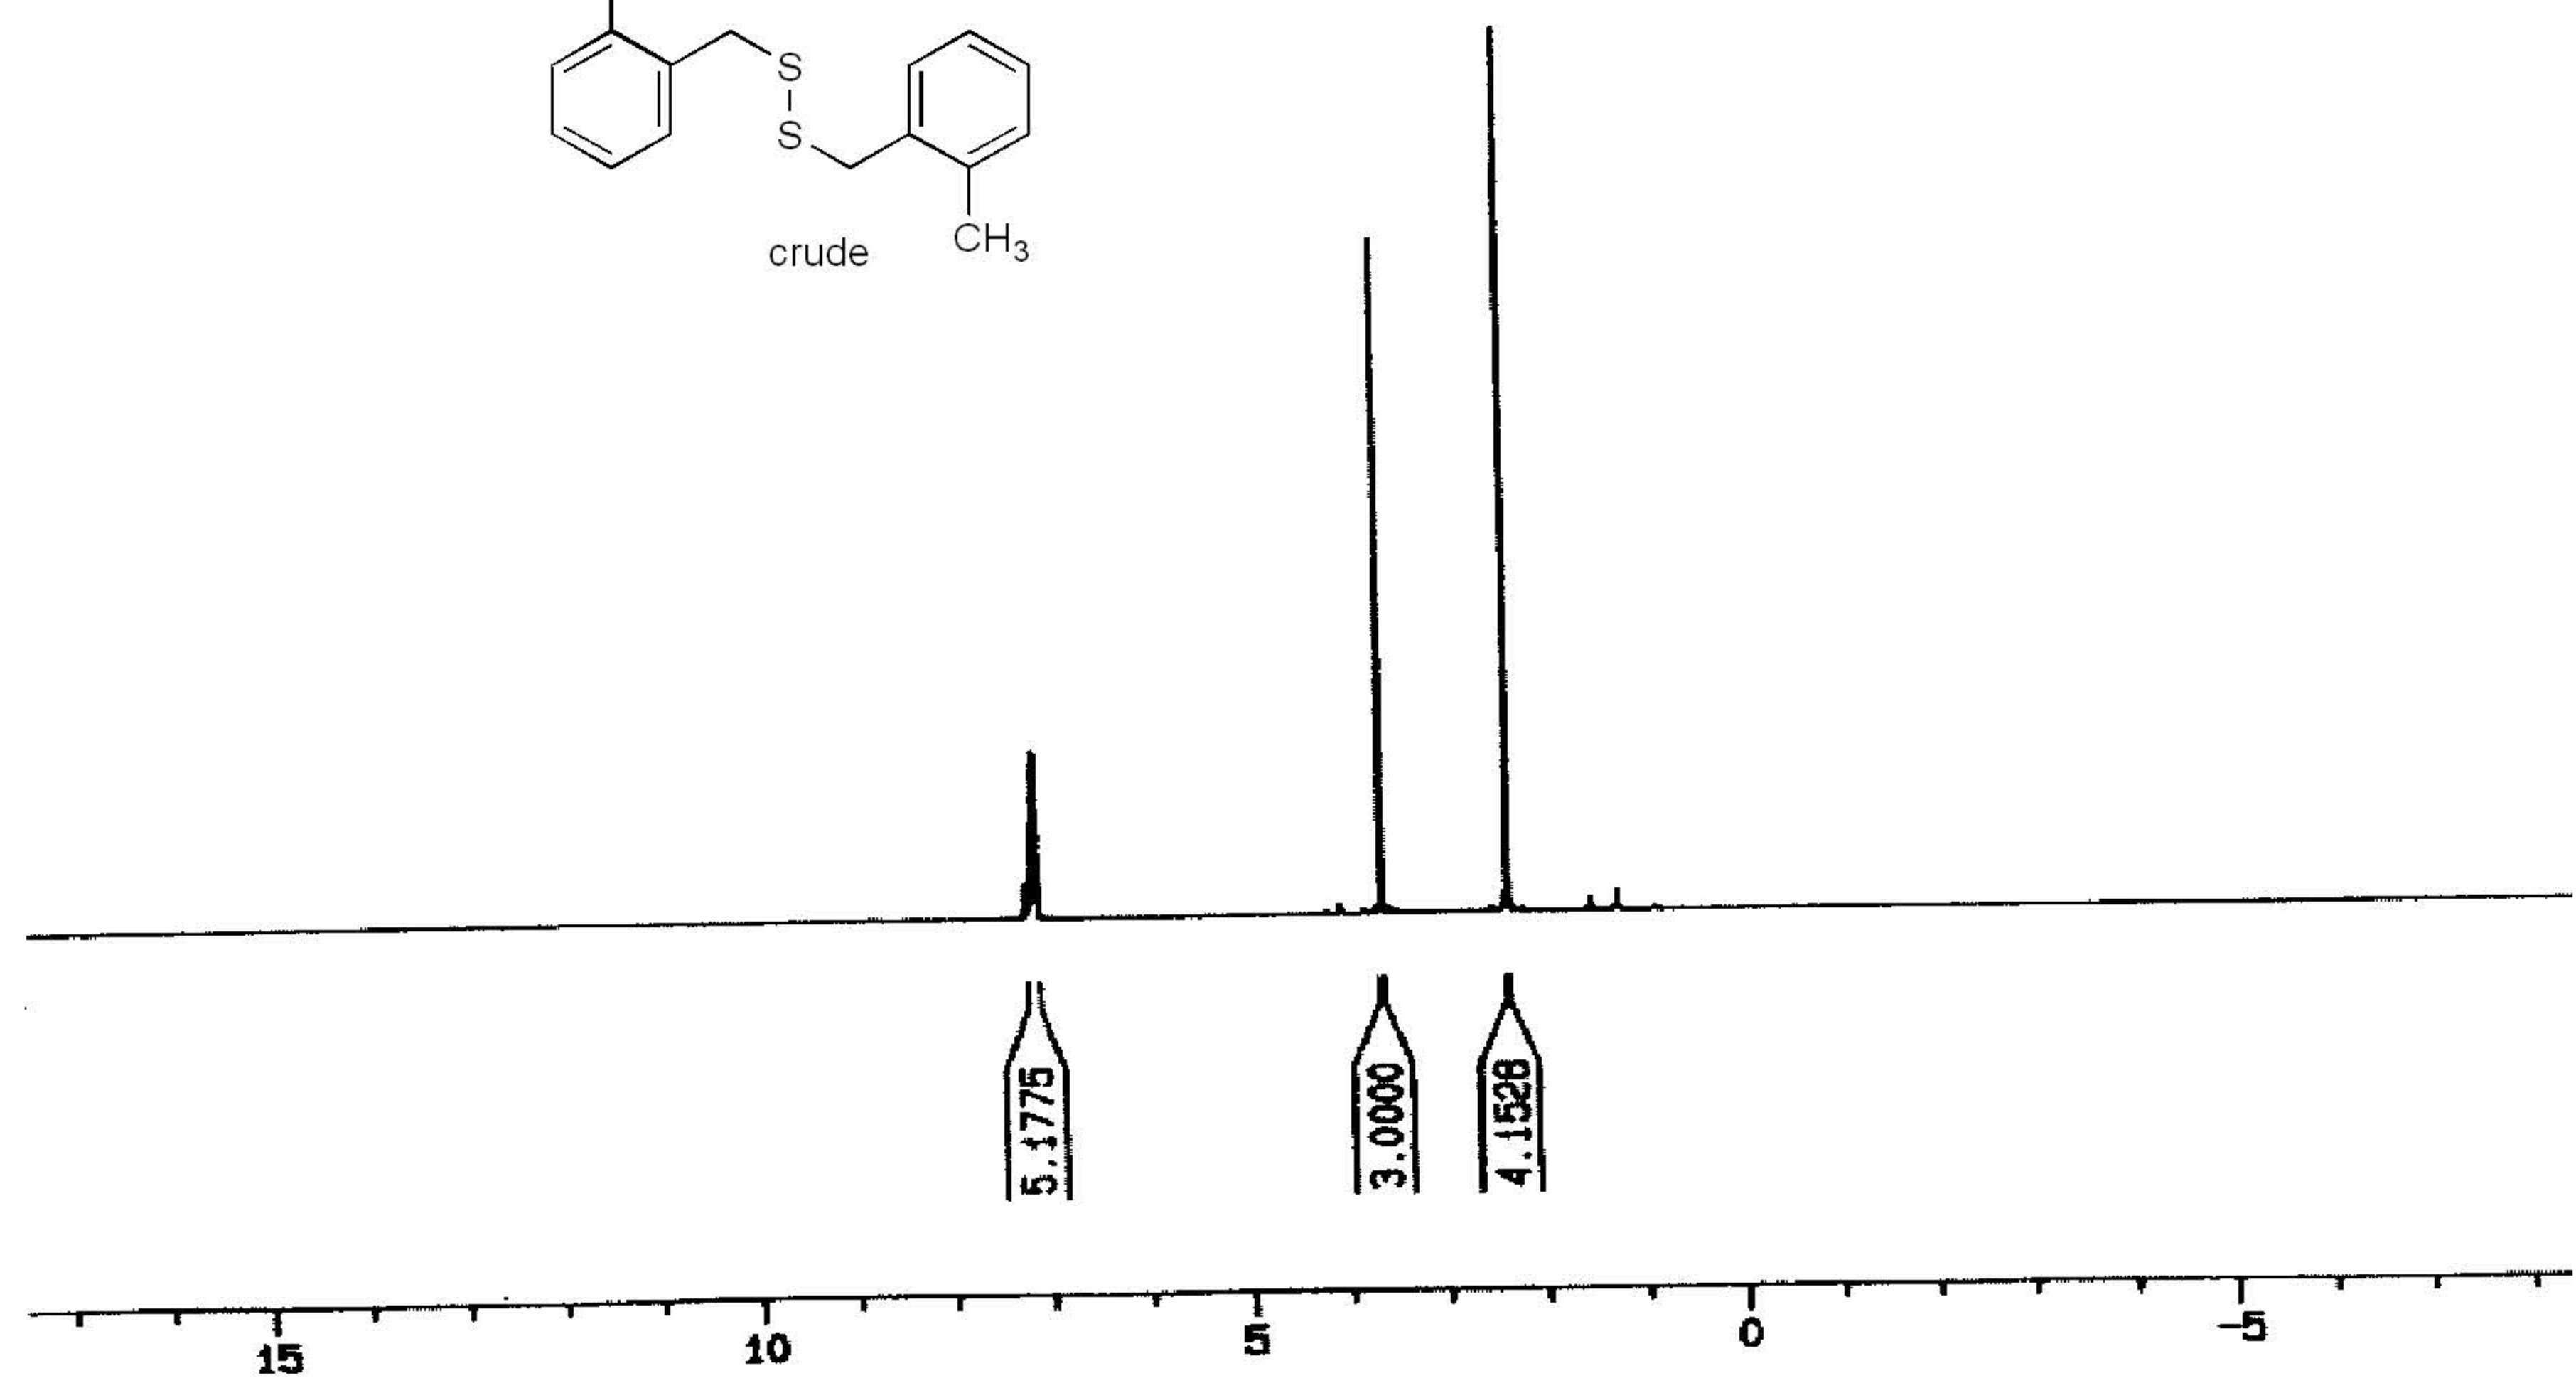

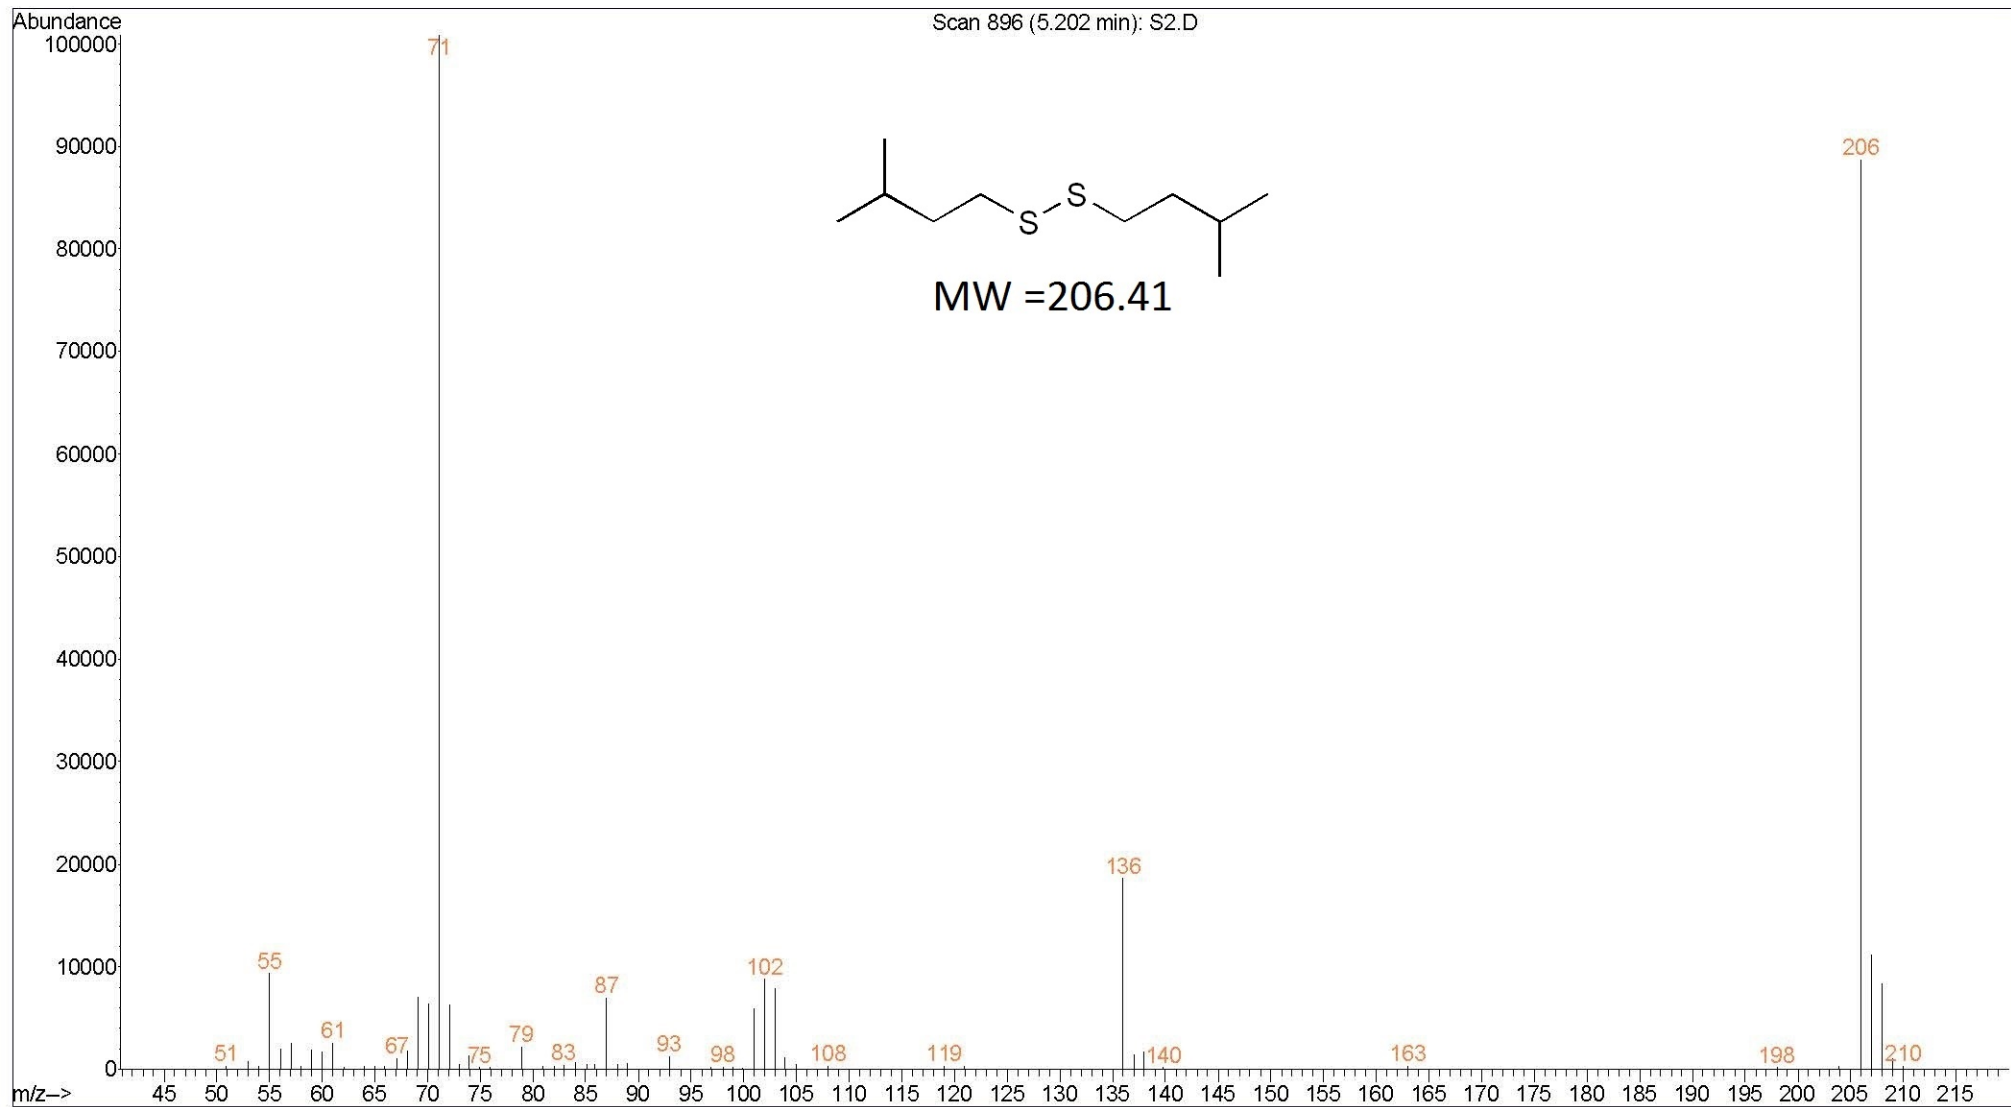

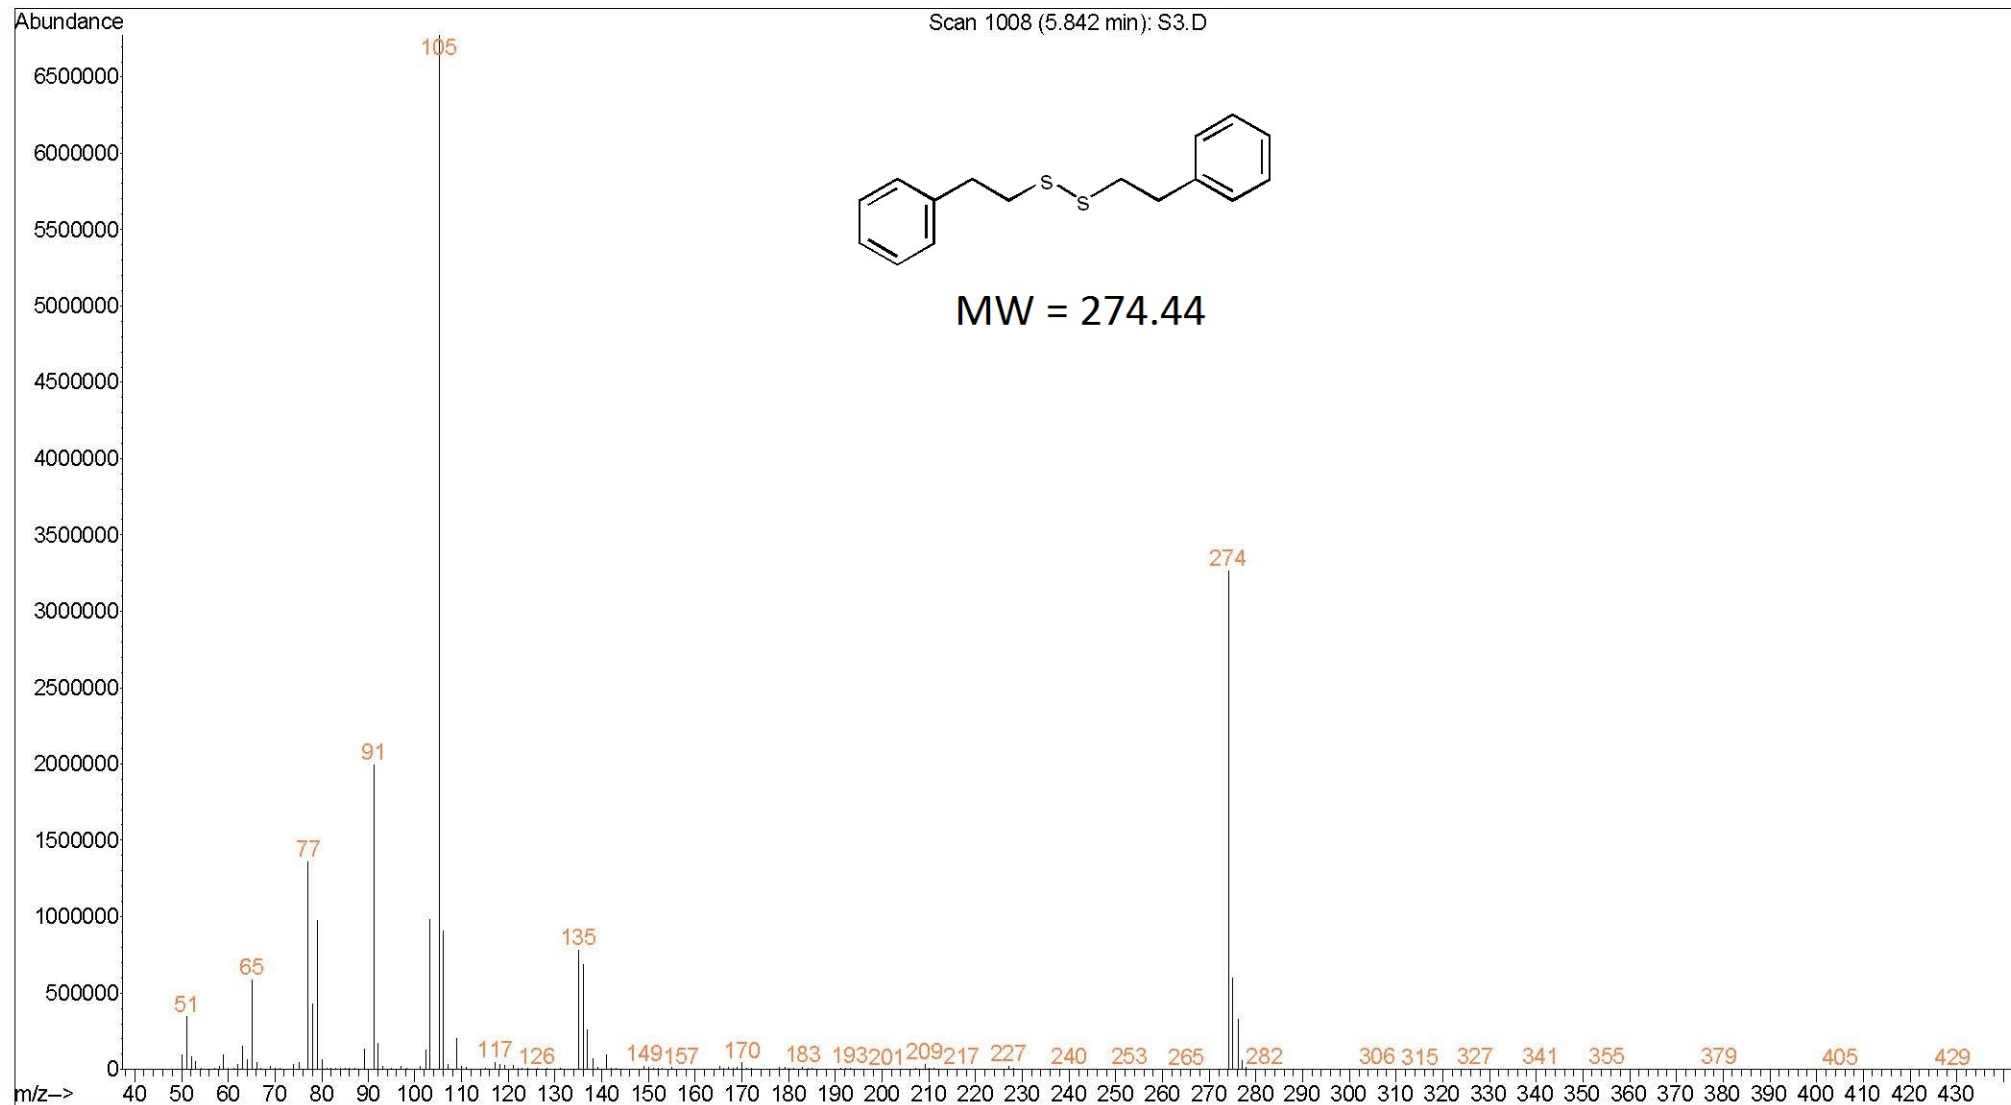

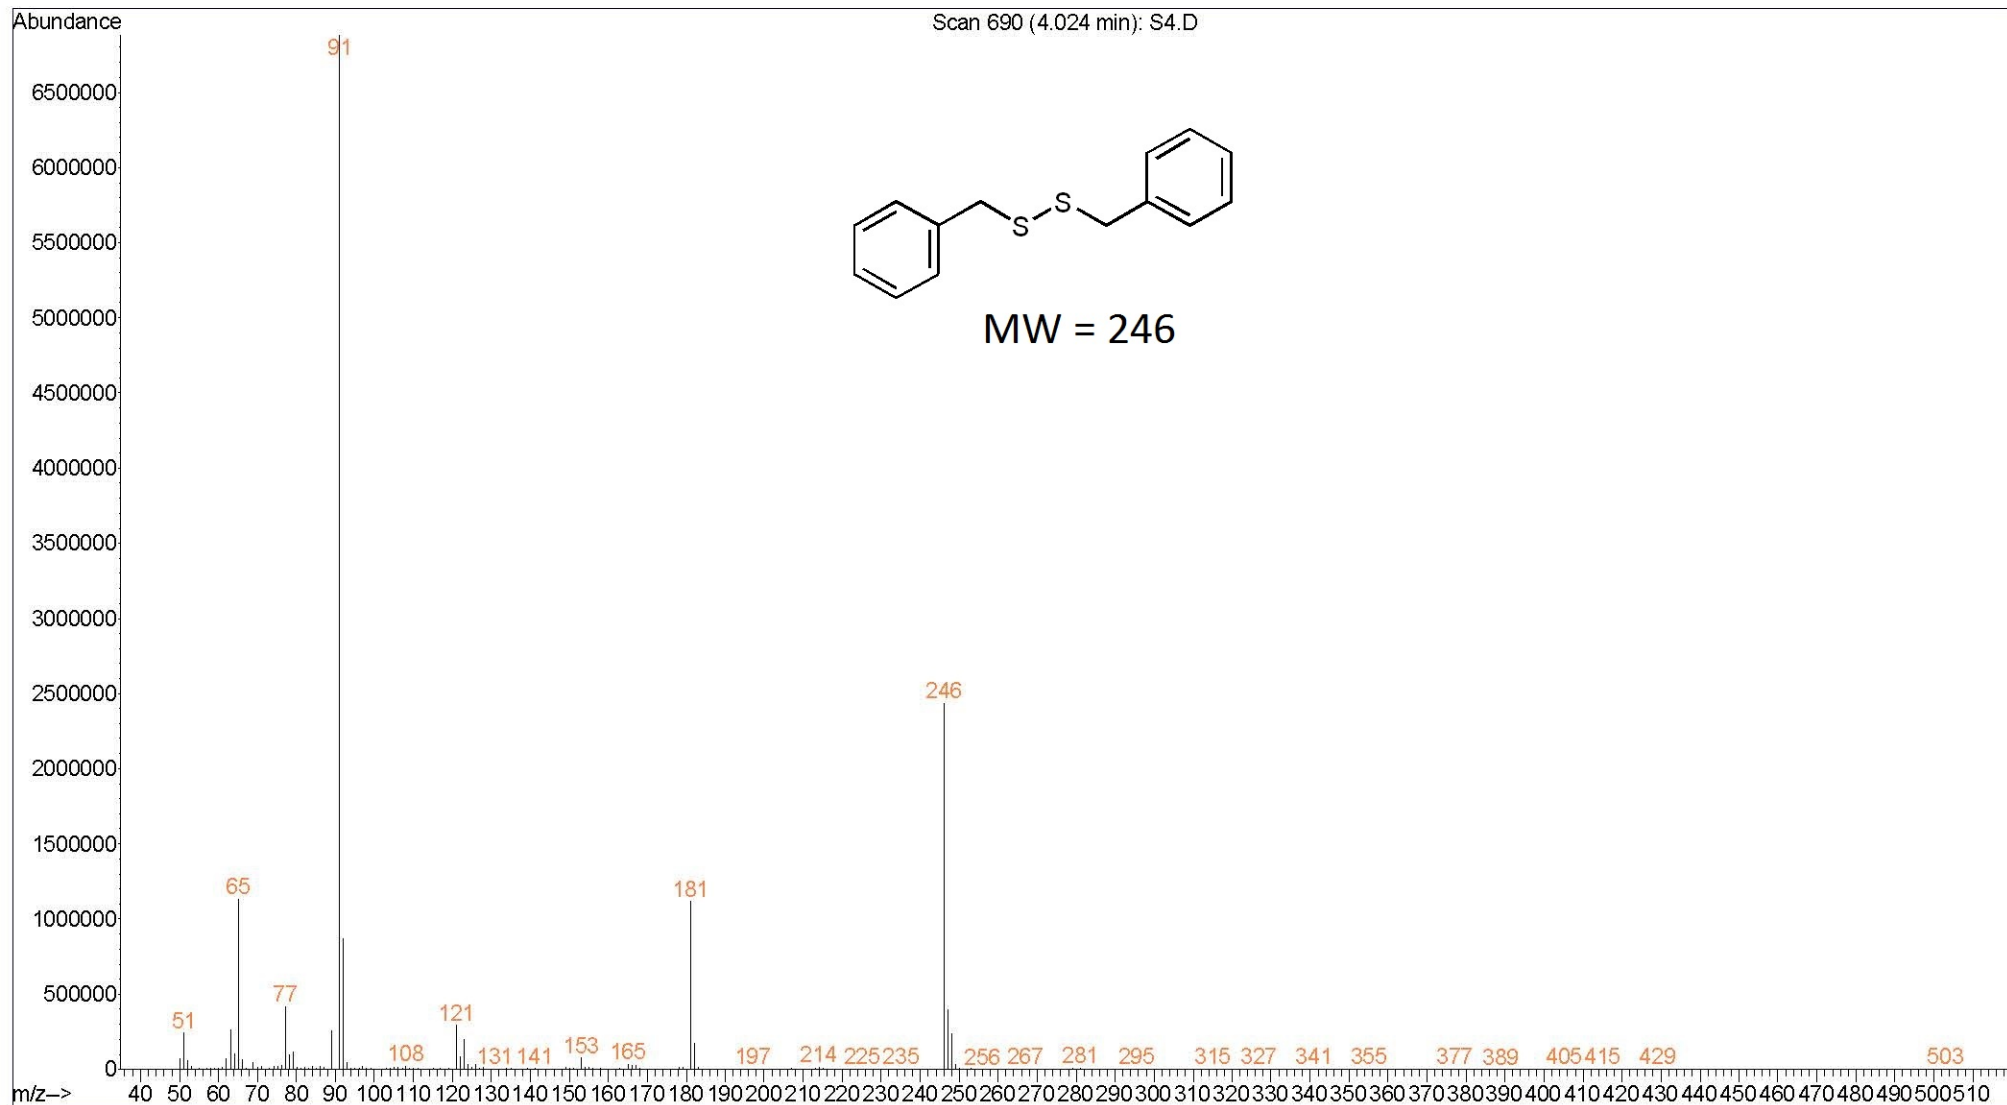

Supplement: c5nj01885d1.pdf [file c5nj01885d1.pdf]
